# Supplementary material for: Room-temperature near-infrared phosphorescence of a bismuthinidene N,C,N pincer complex
Source: Royal Society of Chemistry journal article supplement (doi:10.1039/d5cc00127g), 2025-01-01
Supplement: d5cc00127g1.pdf [file d5cc00127g1.pdf]

# Supporting Information

for

## Room-Temperature Near-Infrared Phosphorescence of a Bismuthinidene N,C,N Pincer Complex

Katharina L. Deuter, Daisy J. J. Balaba, Michael Linseis, Rainer F. Winter

Fachbereich Chemie, Universität Konstanz, Universitätsstraße 10, 78457 Konstanz (Germany); E-mail: rainer.winter@uni-konstanz.de

### Table of Contents

|                                             |    |
|---------------------------------------------|----|
| 1. Acknowledgements and Contributions ..... | 2  |
| 2. General Methods.....                     | 2  |
| 3. Synthesis.....                           | 4  |
| 4. NMR Spectroscopy .....                   | 7  |
| 5. SC-XRD .....                             | 15 |
| 6. UV-Vis Spectroscopy.....                 | 23 |
| 7. Photoluminescence Measurements .....     | 24 |
| 8. TD-DFT Calculations.....                 | 27 |
| References.....                             | 50 |

## 1. Acknowledgements and Contributions

Synthesis and characterization of the compounds and investigation of the absorptive and emissive properties were conducted by K. L. Deuter and in part by D. J. J. Balaba. SC-XRD data acquisition and processing was conducted by K. L. Deuter. Computational investigations using gaussian 16 were conducted by K. L. Deuter and ORCA calculations were conducted by K. L. Deuter under the direction of M. Linseis. The manuscript was prepared by K. L. Deuter with input from all authors. K. L. Deuter and R. F. Winter conceived the project and R. F. Winter supervised the research. The authors acknowledge support by the state of Baden-Württemberg through bwHPC and the German Research Foundation (DFG) through grant no INST 40/575-1 FUGG (JUSTUS 2 cluster), and the NMR Core Facility at the University of Konstanz for experimental support and spectrometer upkeep. K. L. Deuter would like to thank Moritz Nau and Luisa Rieger for proofreading early versions of this manuscript and Johannes Ehlert and Elias Weiße for the synthetic post-production of **LBi** as part of their undergraduate studies.

## 2. General Methods

**Syntheses** of all compounds were carried out according to modified literature procedures (see below), using standard Schlenk techniques or a nitrogen-filled glovebox when specified. Solvents (benzene, THF, Et<sub>2</sub>O, <sup>n</sup>hexane) were dried over a *MBRAUN* solvent purification system (SPS) and kept over molecular sieves (4 Å) and stored under nitrogen atmosphere prior to use. Water contents were determined to be <2 ppm using a Karl-Fischer-Coulometer from *SI Analytix* in regular time intervals. Other solvents (C<sub>6</sub>D<sub>6</sub>, 2-MeTHF) were dried over molecular sieves (4 Å). Commercially available starting materials were used as received.

**<sup>1</sup>H-NMR** spectra were measured on a Bruker Avance III 400 Spectrometer ( $B_H = 400$  MHz), a Jeol 500 Spectrometer ( $B_H = 500$  MHz), and a Bruker Avance III 600 Spectrometer ( $B_H = 600$  MHz) at r.t. in CD<sub>2</sub>Cl<sub>2</sub>, CDCl<sub>3</sub>, C<sub>6</sub>D<sub>6</sub> or DMSO-d<sub>6</sub>. **<sup>13</sup>C-NMR** spectra were recorded on a Bruker Avance III 600 Spectrometer ( $B_C = 151$  MHz) or on a Bruker Avance III 400 spectrometer ( $B_C = 101$  MHz) in CD<sub>2</sub>Cl<sub>2</sub> and C<sub>6</sub>D<sub>6</sub>. All spectra were referenced against the residual protonated solvent (<sup>1</sup>H,  $\delta = 5.32$  ppm for CHDCl<sub>2</sub>, 7.16 ppm for C<sub>6</sub>D<sub>5</sub>H, 7.26 ppm for CHCl<sub>3</sub>, and 4.79 ppm for DMSO. NMR spectra of **LBi** were recorded in custom-built 5 mm boroeco 5-7 NMR tubes fitted with a J. YOUNG`S Teflon cap and an insert.

**Elemental analysis.** A C, H, N-analyzer (model Elementar vario MICRO Cube) by Heraeus was used for combustion analyses.

**UV-Vis absorption** spectra were recorded on a TIDAS fiber optic diode array spectrometer, which consists of a combination of MCS UV/Vis and PGS NIR instruments from *j&m Analytic AG*. Extinction coefficients were measured using quartz cells with an optical path length of 1 cm, which were purchased from *Hellma Analytix*, or in a custom-built quartz cuvette with vacuum valve, whereby the original cuvette was a 1 cm cell with a 221.01Qs tube purchased from *Hellma Analytix*.

**Photoluminescence Spectroscopy** Excitation and emission spectra and the respective lifetimes of the excited states were recorded with the FluoTime 300 spectrometer from *PicoQuant*. All measurements were performed in dry 2-Me-THF, THF or CH<sub>2</sub>Cl<sub>2</sub>. Spectra of **LBiBr<sub>2</sub>** in 2-MeTHF were recorded in quartz tubes. Solutions of **LBi** in 2-MeTHF were handled in custom-built 5 mm boroeco 5-7 NMR tubes fitted with a J. YOUNG`S Teflon cap and an insert. Spectra of **LBi** in THF were subjected to four freeze-pump-thaw cycles prior to measurement to ensure that no quenching through residual O<sub>2</sub> could take place, and subsequently sealed in the cuvettes by melting. UV-vis absorption spectra were recorded prior to and after measurements and subsequently compared to guarantee no degradation during the measurement. Absolute quantum yields were determined using an integrating sphere within the FluoTime 300 spectrometer.

**Single Crystal X-ray Diffraction** for **LBiBr<sub>2</sub>** and **LBr** was conducted on a STOE IPDS II diffractometer from *STOE & Cie GmbH* at 100 K equipped with a graphite monochromator and a Mo  $K_{\alpha}$ -radiation source ( $\lambda = 0.71073 \text{ \AA}$ ). The X-Area program package was used for data processing, and absorption correction was conducted both semi-empirically and spherically. The structure was solved with SHELXT<sup>1, 2</sup> and the OLEX2<sup>3</sup> program packages. All non-hydrogen atoms were refined anisotropically. Intermolecular interactions were analyzed using the Mercury and OLEX2 program packages. Deposition Numbers 2394890 and 2412557 contain the supplementary crystallographic data for this paper.

**Quantum chemical calculations** based on density functional theory (DFT) employed the Gaussian 16 program package.<sup>4</sup> Geometry optimization was followed by vibrational analysis. All calculations were performed in either CH<sub>2</sub>Cl<sub>2</sub> for **LBiBr<sub>2</sub>** or benzene for **LBi** as the solvent, applying the polarizable continuum model (SMD).<sup>5</sup> Electronic spectra were calculated at the optimized ground-state structures by the time-dependent-DFT method. In conjunction with the Perdew, Burke Ernzerhof exchange and correlation functional PBE0,<sup>6, 7</sup> the fully realistic small-core multiconfiguration Dirac-Hartree Fock-adjusted pseudopotential and the corresponding set for Bi(ECP60MDF)<sup>8</sup> and 6-31(G)<sup>9</sup> polarizable double- $\zeta$  basis sets for the remaining atoms were used. ORCA Calculations including spin-orbit coupling were carried out using the ORCA 5.0.4 software package.<sup>10</sup> For the ground and excited triplet states, the optimization was performed according to the unrestricted Kohn-Sham (KS) DFT process. LR-CPCM was used for calculations of dissolved species **LBiBr<sub>2</sub>** or **LBi**, using CH<sub>2</sub>Cl<sub>2</sub> or benzene. For the excited states, TD-DFT without TDA was employed. Optimized structures were checked for negative frequencies. The spin-orbit integrals were calculated using the RI-SOMF(1X) approximation.<sup>11</sup> Calculations were done using the PBE0-functional (PBE0)<sup>6, 7</sup> with the SARC-ZORA-TZVP basis set<sup>12-14</sup> for Bi and the ZORA-def2-TZVP basis<sup>15, 16</sup> and the SARC/J decontracted def2/J auxiliary basis for all other elements. The GaussSum,<sup>17</sup> Avogadro,<sup>18</sup> GNU Parallel<sup>19</sup> and vmd<sup>20</sup> program packages were used in combination with POV-Ray<sup>21</sup> for data processing and graphical representations.

### 3. Synthesis

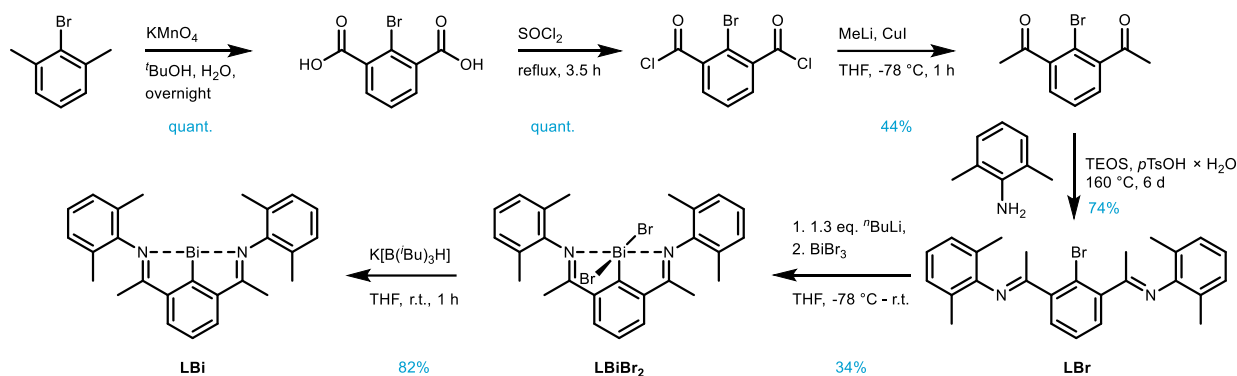

**Scheme S1.** Schematic overview of the synthesis steps conducted in this work. All syntheses were conducted based on modified literature procedures.

#### 2-Bromoisophthalic acid<sup>22</sup>

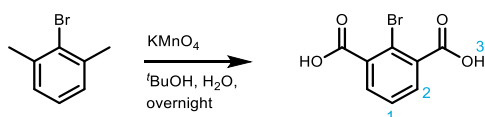

2-Bromo-*m*-xylene (18.0 mL, 131 mmol, 1.00 eq.) was suspended in a *t*-BuOH/H<sub>2</sub>O mixture (135 mL/250 mL) and heated to reflux at 110 °C. KMnO<sub>4</sub> (128 g, 810 mmol, 6.18 eq.) was added in portions and the mixture was stirred for 14 h at 110 °C and then allowed to cool to room temperature. The resulting mixture was filtered through a Büchner funnel. The black precipitate was extracted with distilled water (3 x 40 mL). The combined organic/aqueous phases were acidified with concentrated aqueous HCl (10 mL, 37m%), resulting in the precipitation of a white solid which was collected by Büchner filtration. The white solid was dried in a vacuum desiccator over P<sub>2</sub>O<sub>5</sub> for four days to remove residual traces of water. 2-Bromoisophthalic acid (32.0 g, 131 mmol) was obtained as a white, fluffy solid in quantitative yield.

<sup>1</sup>H-NMR (400 MHz, 298 K, DMSO-*d*<sub>6</sub>) δ [ppm] = 13.59 (s, 1H, H-3), 7.69 (d, <sup>3</sup>J<sub>HH</sub> = 7.6 Hz, 2H, H-2), 7.52 (t, <sup>3</sup>J<sub>HH</sub> = 7.6 Hz, 1H, H-1).

#### 2-Bromoisophthaloyl dichloride<sup>22</sup>

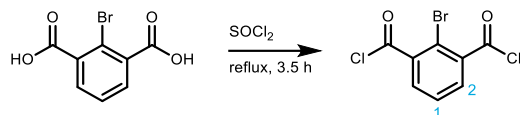

Under inert gas conditions, 2-bromoisophthalic acid (4.03 g, 16.5 mmol, 1.00 eq.) was suspended in SOCl<sub>2</sub> (30 mL). The reaction mixture was heated to reflux at 100 °C for 2.5 h and then at 120 °C for an additional hour until the 2-bromoisophthalic acid had dissolved completely, resulting in a clear yellow solution. After cooling to room temperature, SOCl<sub>2</sub> was removed *in vacuo*. 2-Bromoisophthaloyl dichloride (4.64 g, 16.5 mmol) was obtained as white solid in quantitative yield.

<sup>1</sup>H-NMR (500 MHz, 298 K, CDCl<sub>3</sub>) δ [ppm] = 7.99 (d, <sup>3</sup>J<sub>HH</sub> = 7.9 Hz, 2H, H-2), 7.61 (t, <sup>3</sup>J<sub>HH</sub> = 7.9 Hz, 1H, H-1).

## 2,6-Diacetylbromobenzene<sup>22</sup>

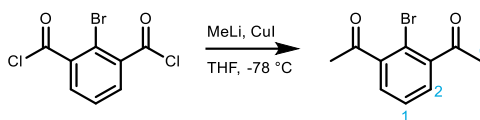

Under inert gas conditions, CuI (5.31 g, 27.9 mmol, 2.16 eq.) was suspended in dry THF (200 mL) and the suspension was cooled to -78 °C. A solution of MeLi·LiBr in dry Et<sub>2</sub>O (37 mL, 1.50 M, 4.30 eq.) was added. This suspension was stirred at -78 °C for one hour. A solution of 2-bromoisophthaloyl dichloride (3.64 g, 12.9 mmol, 1.00 eq.) in THF (24 mL, dry) was added dropwise to the reaction mixture. The resulting bright yellow solution was stirred at -78 °C for three hours and then slowly warmed to room temperature overnight, resulting in a black reaction mixture, which was quenched with <sup>i</sup>PrOH (10 mL). The solvent was removed under reduced pressure. Aqueous HCl (50 mL, 1.0 M) was added to the residue and the resulting grey solid was removed by Büchner filtration. The precipitate was extracted with Et<sub>2</sub>O (2 x 50 mL). The aqueous and organic phases were separated and the aqueous phase extracted with Et<sub>2</sub>O (2 x 50 mL). The combined yellow organic phases were dried over Na<sub>2</sub>SO<sub>4</sub> and the solvent was removed under reduced pressure. The crude product was obtained as a brown oil, which was purified by column chromatography on silica (PE/EE, v/v, 5:1). 2,6-Diacetylbromobenzene (1.37 g, 5.7 mmol) was obtained as a pale-yellow oil in 44% yield.

<sup>1</sup>H-NMR (400 MHz, 298 K, CDCl<sub>3</sub>) δ [ppm] = 7.50-7.36 (m, 3H, H-2, H-1), 2.62 (s, 6H, H-6).

## (1E,1'E)-1,1'-(2-Bromo-1,3-phenylene)bis(N-(2,6-dimethylphenyl)ethan-1-imine) LBr<sup>22</sup>

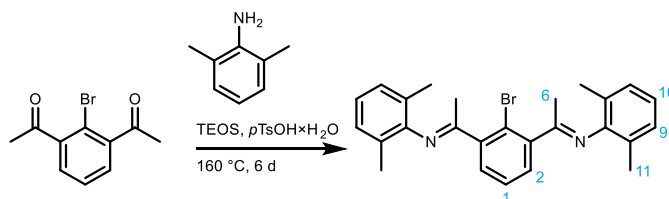

Under inert gas conditions, 2,6-diacetylbromobenzene (1.27 g, 5.3 mmol, 1.00 eq.), 2,6-dimethylaniline (2.0 mL, 16.1 mmol, 3.05 eq.), Si(OEt)<sub>4</sub> (9.4 mL, 42 mmol, 8.0 eq.) and *p*-toluene sulfonic acid monohydrate (512 mg, 2.7 mmol, 0.51 eq.) were placed into a Schlenk tube and stirred at 160 °C for six days. The dark brown reaction mixture was quenched by addition of aqueous NaOH (20 mL, 0.10 M) and EtOH (14 mL). The resulting deep violet organic phase was separated and concentrated under reduced pressure. Distilled water (25 mL) was added and the aqueous solution was extracted with Et<sub>2</sub>O (4 x 50 mL). The combined brown organic layers were dried over Na<sub>2</sub>SO<sub>4</sub> and concentrated under reduced pressure. The crude product was purified by column chromatography on silica (PE/EE, v/v, 5:1). (1E,1'E)-1,1'-(2-bromo-1,3-phenylene)bis(N-(2,6-dimethylphenyl)ethan-1-imine) (**LBr**) (1.75 g, 3.91 mmol) was obtained as a beige solid in 74% yield. Single crystals suitable for SC-XRD were obtained by recrystallization from <sup>n</sup>heptane.

<sup>1</sup>H-NMR (400 MHz, 298 K, CDCl<sub>3</sub>) δ [ppm] = 7.52-7.47 (m, 3H, H-1 & H-2), 7.08 (d, <sup>3</sup>J<sub>HH</sub> = 7.6 Hz, 4H, H-9), 6.96 (t, <sup>3</sup>J<sub>HH</sub> = 7.6 Hz, 2H, H-10), 2.21 (s, 12H, H-11), 2.08 (s, 6H, H-6).

### LBiBr<sub>2</sub><sup>23</sup>

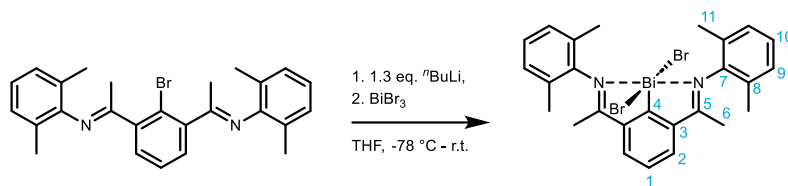

Under inert gas conditions, <sup>n</sup>butyllithium (0.45 mL, 2.5 M in hexane, 1.13 μmol, 1.30 eq.) was added dropwise to a stirred solution of **LBr** (390 mg, 872 μmol, 1.00 eq.) in THF (30 mL, dry) at -78 °C. The mixture was stirred at -78 °C for one hour. The resulting brown solution was added dropwise over the course of 45 minutes to a pre-cooled (-78 °C) solution of BiBr<sub>3</sub> (391 mg, 871 μmol, 1.00 eq.) in THF (15 mL, dry), under vigorous stirring. The turquoise solution was allowed to warm to room temperature overnight, yielding a yellow-green suspension. The solvent was removed under reduced pressure and the residue was washed with a mixture of hexane/Et<sub>2</sub>O (3:1, v/v, 2 x 40 mL). The light brown residue was extracted with CH<sub>2</sub>Cl<sub>2</sub> (2 x 40 mL), yielding a bright yellow solution. The solvent was removed under reduced pressure, yielding **LBiBr<sub>2</sub>** (220 mg, 299 μmol) as a pale-yellow solid in 34% yield. Single crystals suitable for SC-XRD were obtained by evaporation of a concentrated solution of **LBiBr<sub>2</sub>** in dichloromethane.

<sup>1</sup>H-NMR (600 MHz, 298 K, CD<sub>2</sub>Cl<sub>2</sub>) δ [ppm] = 8.65 (d, <sup>3</sup>J<sub>HH</sub> = 7.8 Hz, 2H, H-2), 8.08 (t, <sup>3</sup>J<sub>HH</sub> = 7.8 Hz, 1H, H-1), 7.23-7.15 (m, 6H, H-9, H-10), 2.42 (s, 6H, H-6), 2.41 (s, 12H, H-11).

<sup>13</sup>C-NMR (151 MHz, 298 K, CD<sub>2</sub>Cl<sub>2</sub>) δ [ppm] = 209.0 (C-4), 181.8 (C-5), 148.3 (C-3), 144.7 (C-7), 137.7 (C-2), 131.1 (C-8), 129.7 (C-1), 129.2 (C-9), 126.9 (C-10), 20.9 (C-11), 19.9 (C-6).

**Elemental Analysis** calculated for C<sub>26</sub>H<sub>27</sub>BiBr<sub>2</sub>N<sub>2</sub>: 42.41% C, 3.70% H, 3.80% N; found: 42.57% C, 4.10% H, 3.82% N.

### LBi<sup>23</sup>

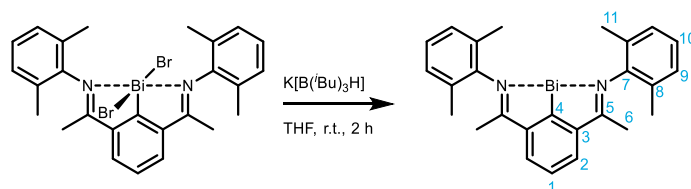

Under inert gas conditions at room temperature, a solution of K[B(‘Bu)<sub>3</sub>H] (0.46 mL, 1.0 M in THF, 459 μmol, 2.00 eq.) was added dropwise to a vigorously stirred solution of **LBiBr<sub>2</sub>** (169 mg, 229 μmol, 1.00 eq.) in THF (20 mL, dry), resulting in a deep green solution. After stirring for one hour at room temperature, the solvent was removed *in vacuo*, and the Schlenk flask was transferred to a nitrogen-filled glovebox for the workup. The dark green residue was extracted six times with dry <sup>n</sup>hexane (6 mL each) until the <sup>n</sup>hexane extract was colourless. The solvent was allowed to evaporate over the course of three days, leading to dark green, (micro)crystalline **LBi** (109 mg, 189 μmol) in 82% yield.

<sup>1</sup>H-NMR (400 Hz, 298 K, C<sub>6</sub>D<sub>6</sub>) δ [ppm] = 8.09 (d, <sup>3</sup>J<sub>HH</sub> = 7.6 Hz, 2H, H-2), 7.11 (t, <sup>3</sup>J<sub>HH</sub> = 7.2 Hz, 1H, H-1), 7.02 (d, <sup>3</sup>J<sub>HH</sub> = 7.5 Hz, 4H, H-9), 6.90 (t, <sup>3</sup>J<sub>HH</sub> = 8.1, 6.9 Hz, 2H, H-10), 2.48 (s, 6H, H-6), 2.02 (s, 12H, H-11).

<sup>13</sup>C-NMR (101 Hz, 298 K, C<sub>6</sub>D<sub>6</sub>) δ [ppm] = 203.8 (C-4), 171.7 (C-5), 147.8 (C-8), 146.1 (C-3), 133.2 (C-2), 129.0 (C-9), 128.1 (C-7), 124.7 (C-10), 121.8 (C-1), 19.2 (C-11), 17.7 (C-5).

## 4. NMR Spectroscopy

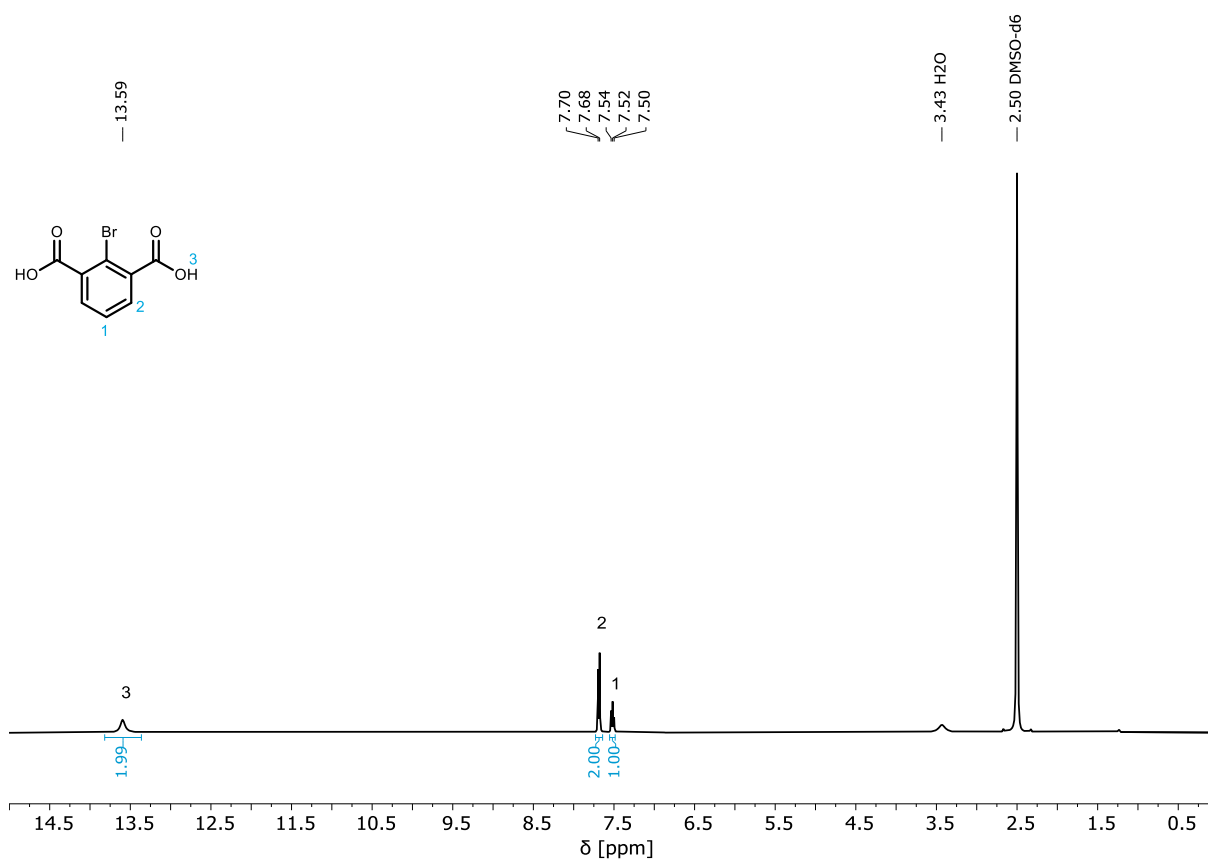

Figure S1. <sup>1</sup>H-NMR spectrum of 2-bromoisophthalic acid in DMSO-d<sub>6</sub> at 298 K.

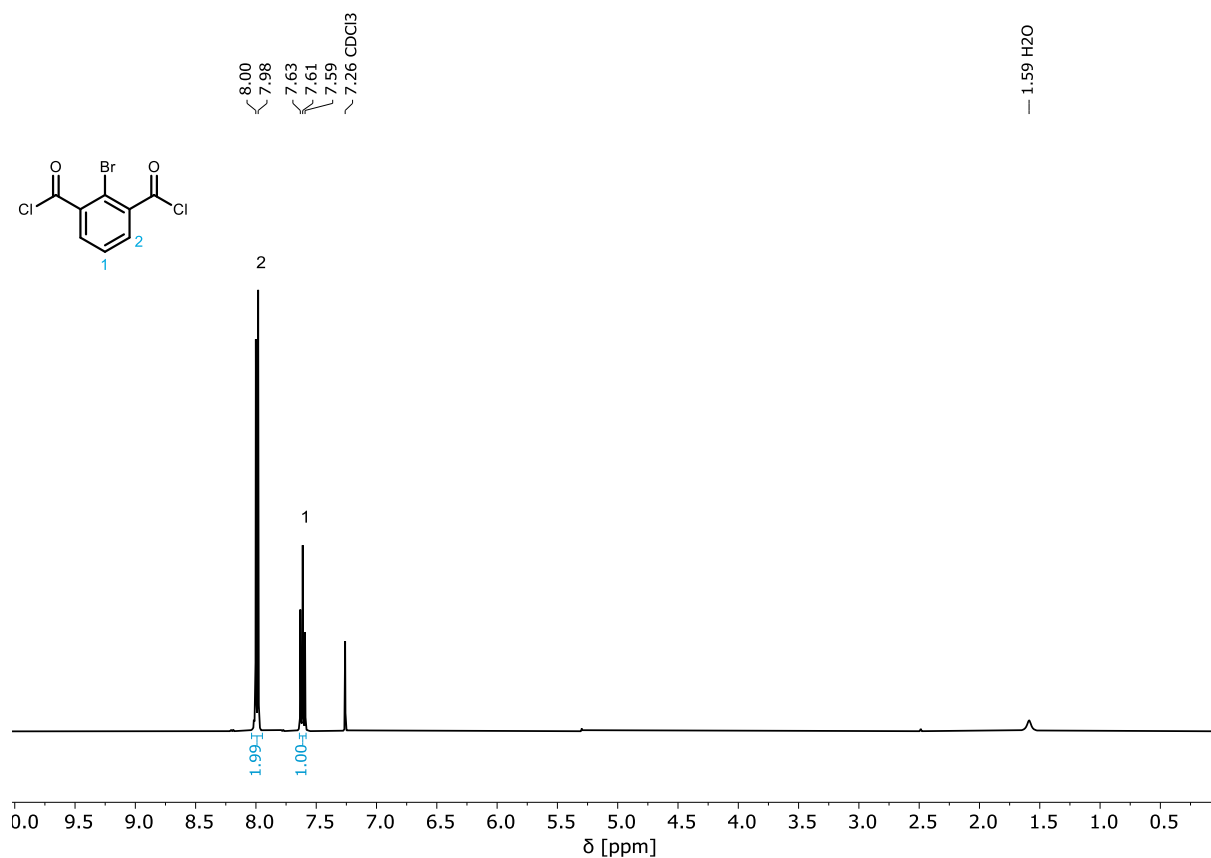

Figure S2. <sup>1</sup>H-NMR spectrum 2-bromoisophthaloyl dichloride in CDCl<sub>3</sub> at 298 K.

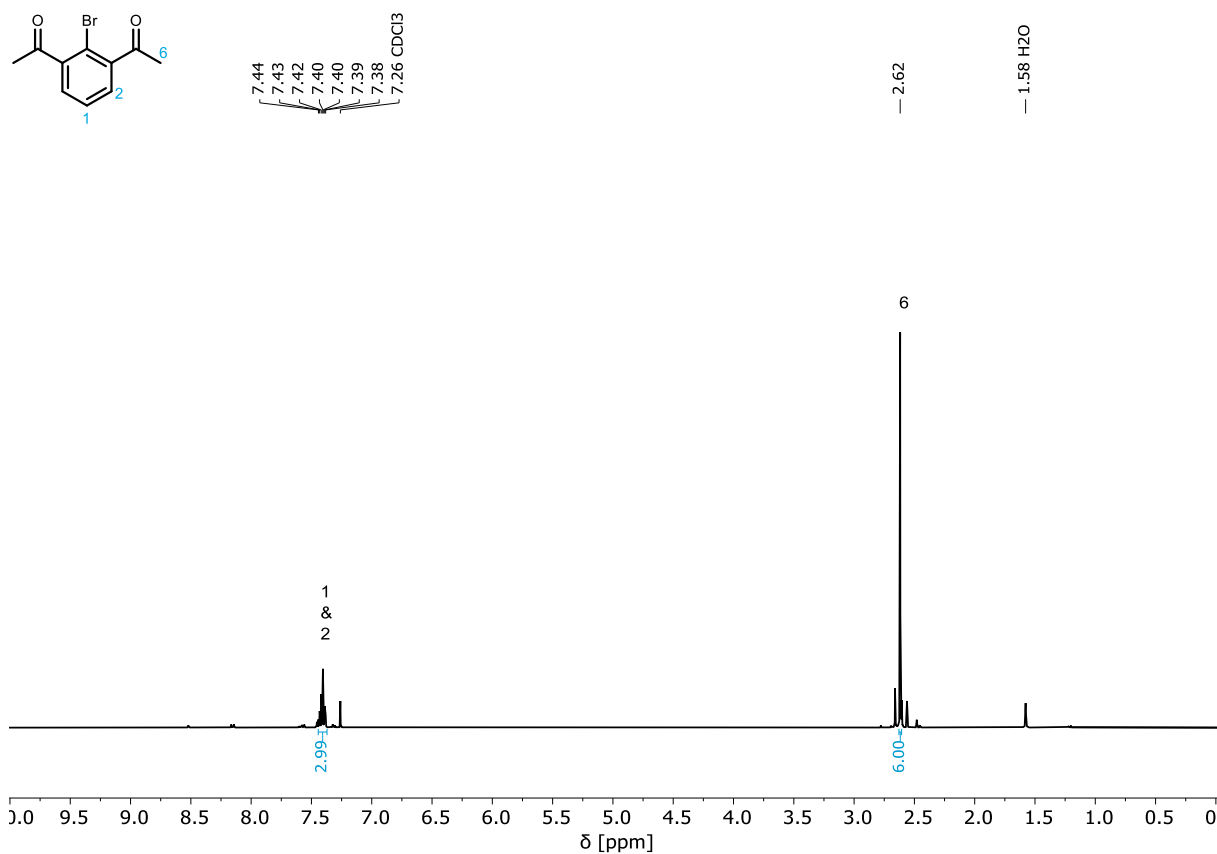

**Figure S3.** <sup>1</sup>H-NMR spectrum of 2,6-diacetyl bromobenzene in CDCl<sub>3</sub> at 298 K.

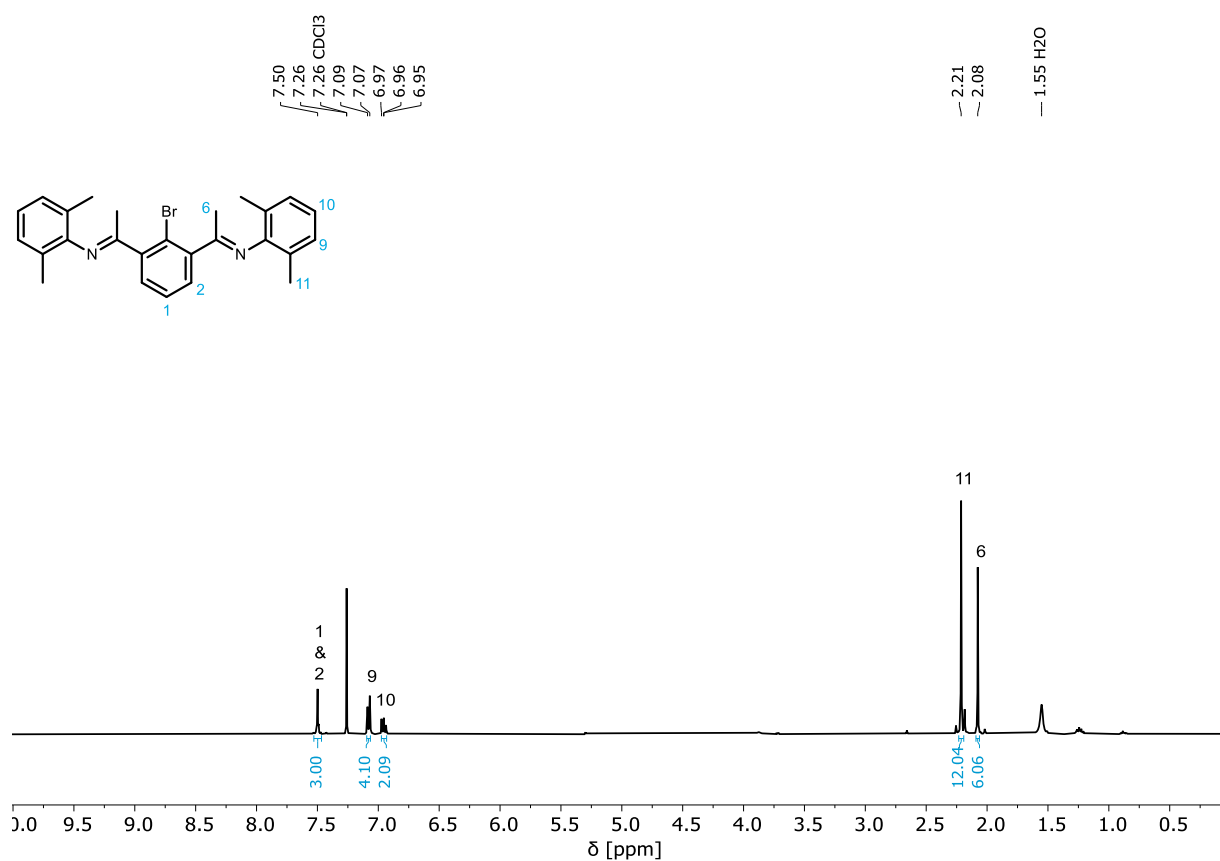

**Figure S4.** <sup>1</sup>H-NMR spectrum of LBr in CDCl<sub>3</sub> at 298 K.



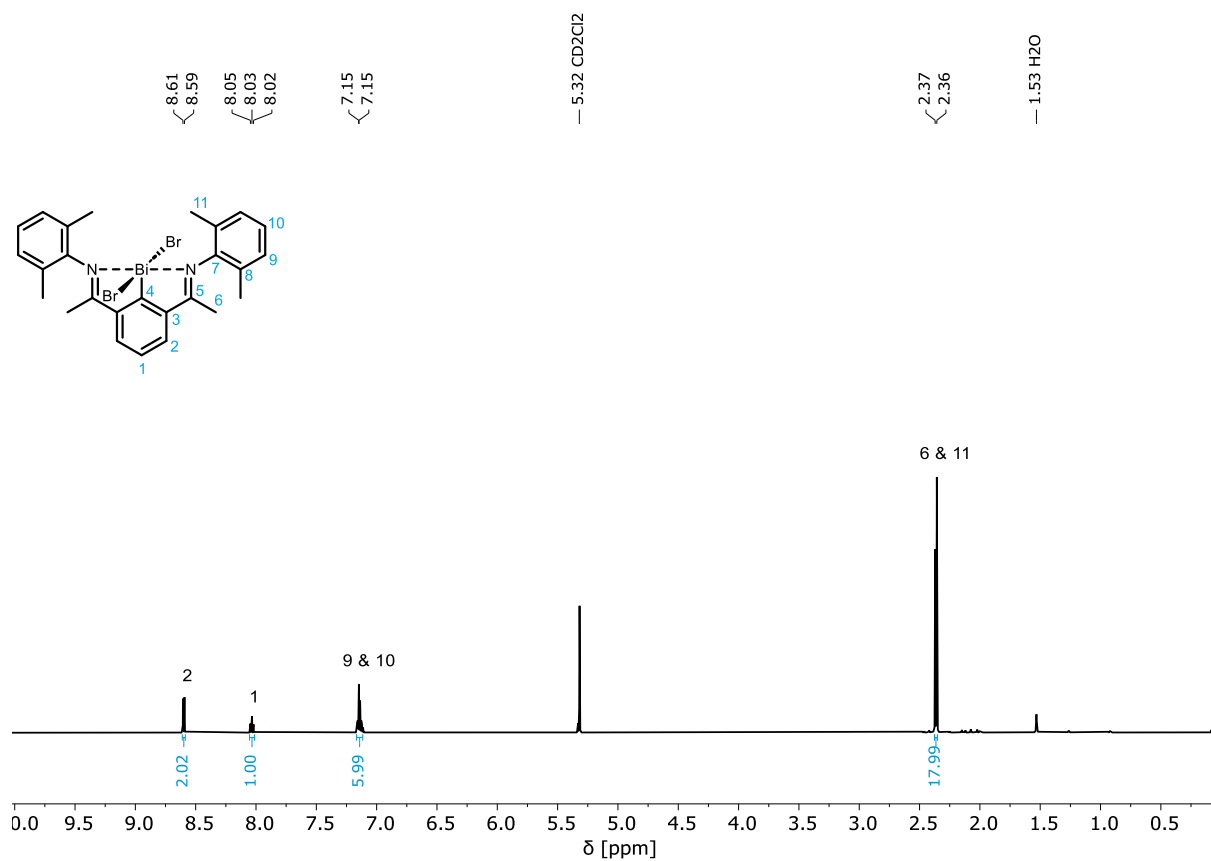

Figure S5.  $^1\text{H-NMR}$  spectrum of  $\text{LBiBr}_2$  in  $\text{CD}_2\text{Cl}_2$  at 298 K.

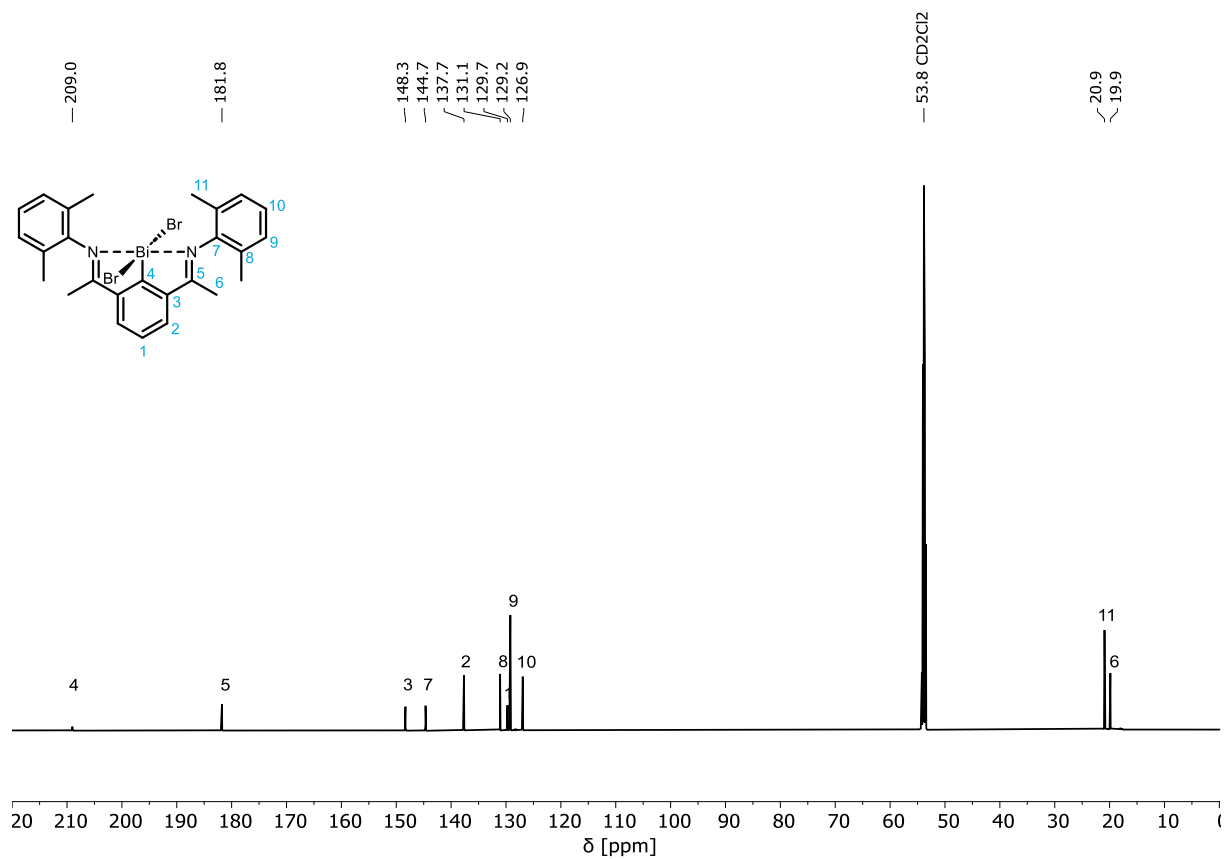

Figure S6.  $^{13}\text{C}\{^1\text{H}\}$ -NMR spectrum of  $\text{LBiBr}_2$  in  $\text{CD}_2\text{Cl}_2$  at 298 K.

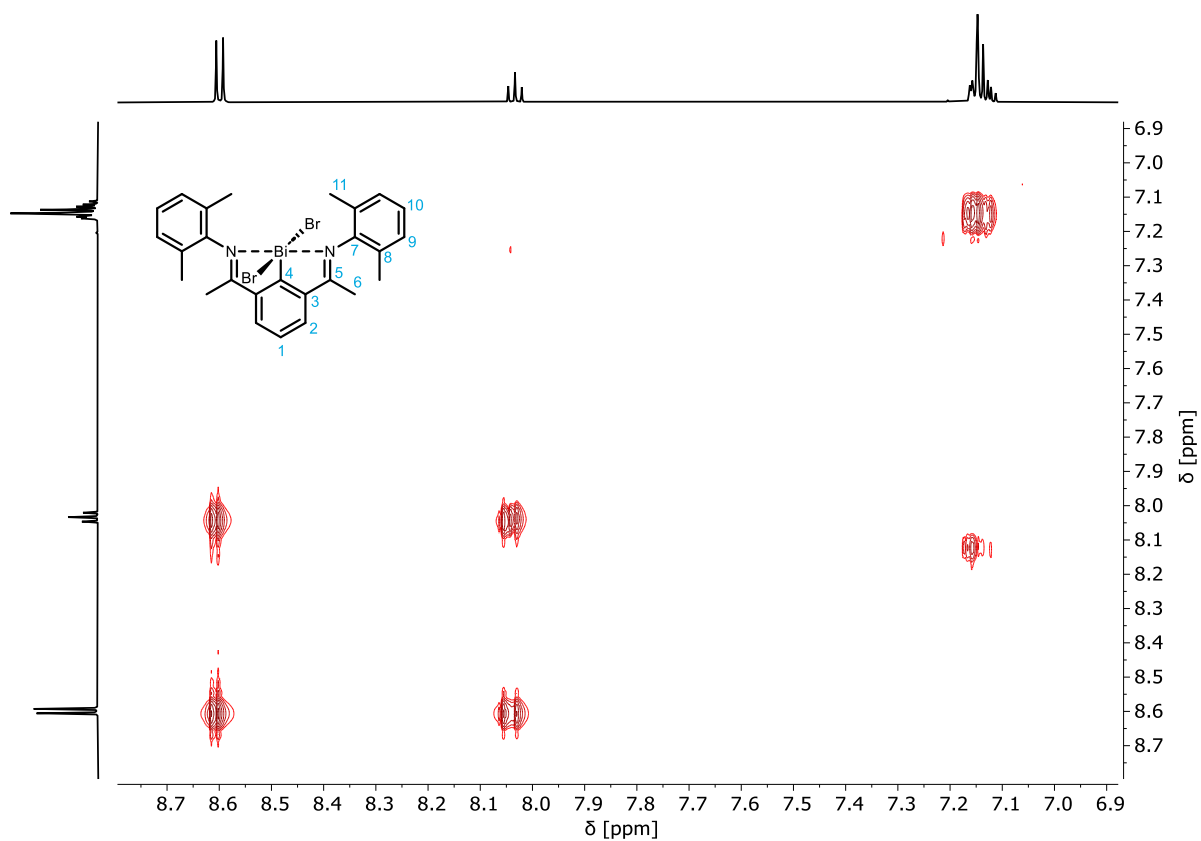

**Figure S7.**  $^1\text{H-NMR}$  COSY spectrum of  $\text{LBiBr}_2$  in  $\text{CD}_2\text{Cl}_2$  at 298 K.

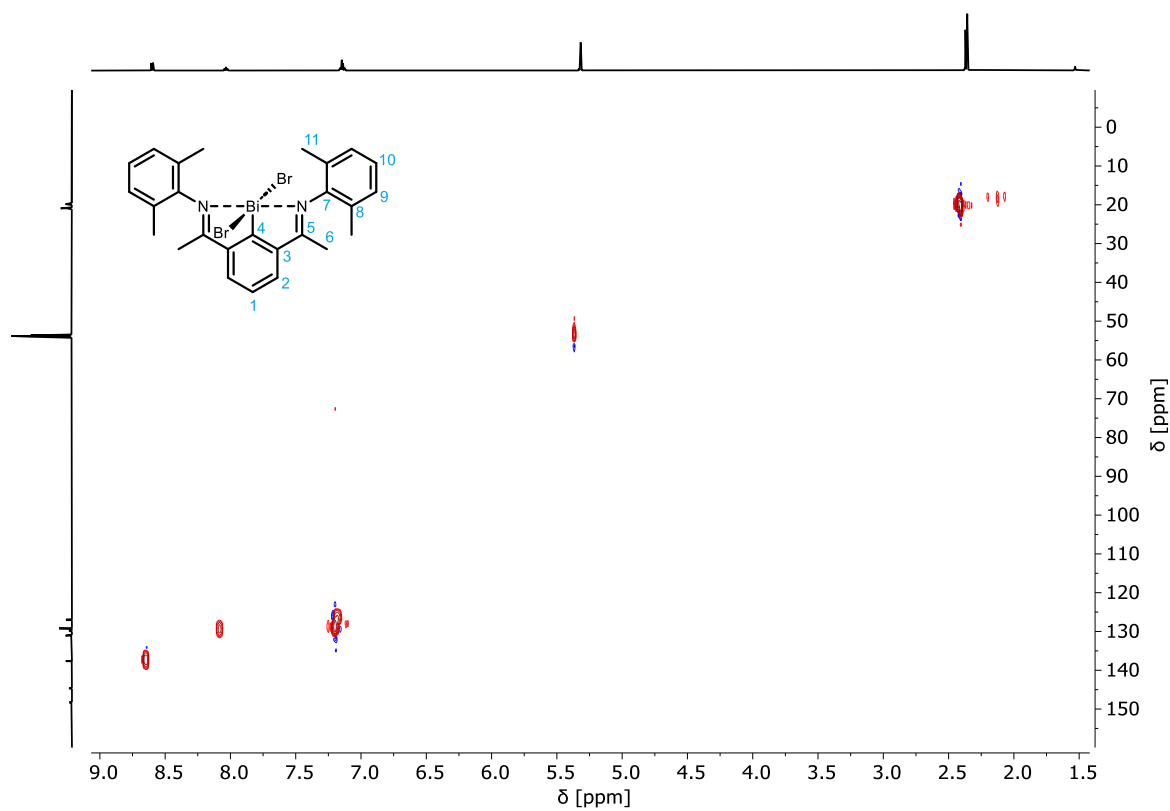

**Figure S8.**  $^1\text{H-NMR}/^{13}\text{C}\{^1\text{H}\}$ -NMR HSQC spectrum of  $\text{LBiBr}_2$  in  $\text{CD}_2\text{Cl}_2$  at 298 K.

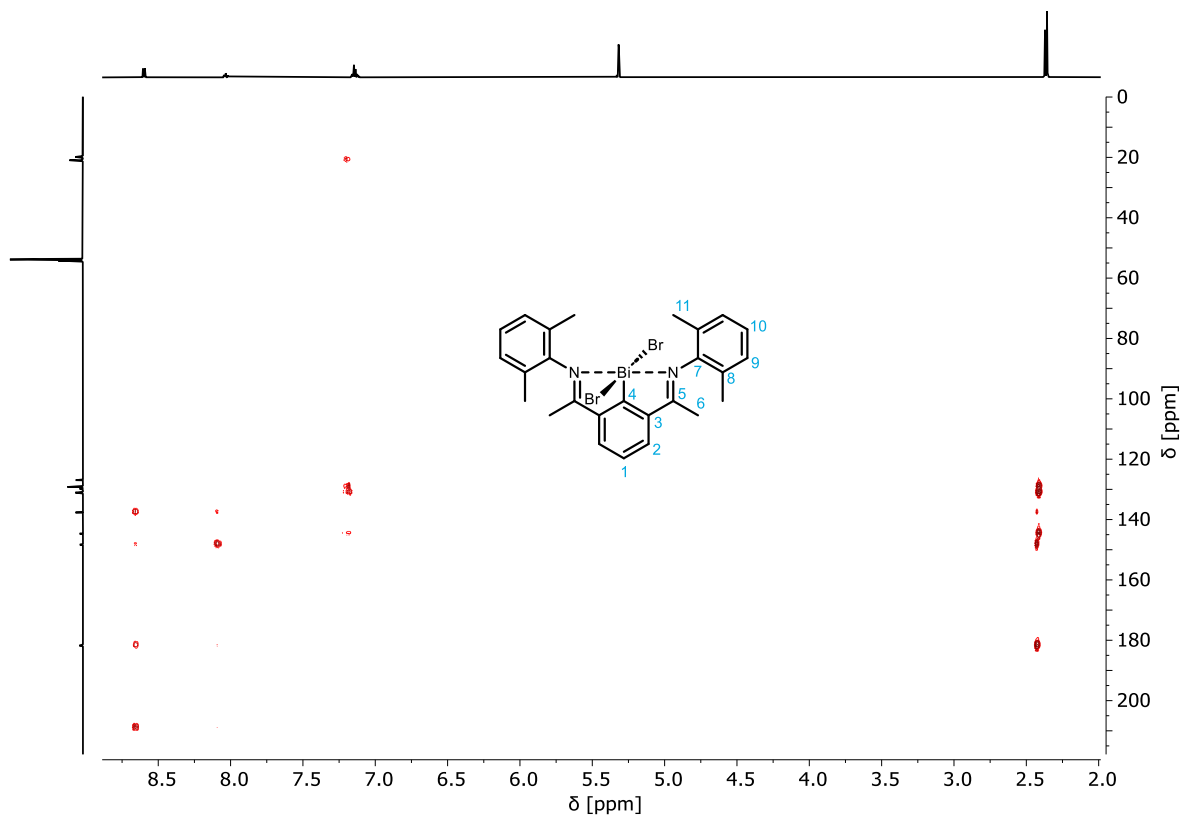

Figure S9.  $^1\text{H-NMR}/^{13}\text{C}\{^1\text{H}\}$ -NMR HMBC spectrum of  $\text{LBiBr}_2$  in  $\text{CD}_2\text{Cl}_2$  at 298 K.

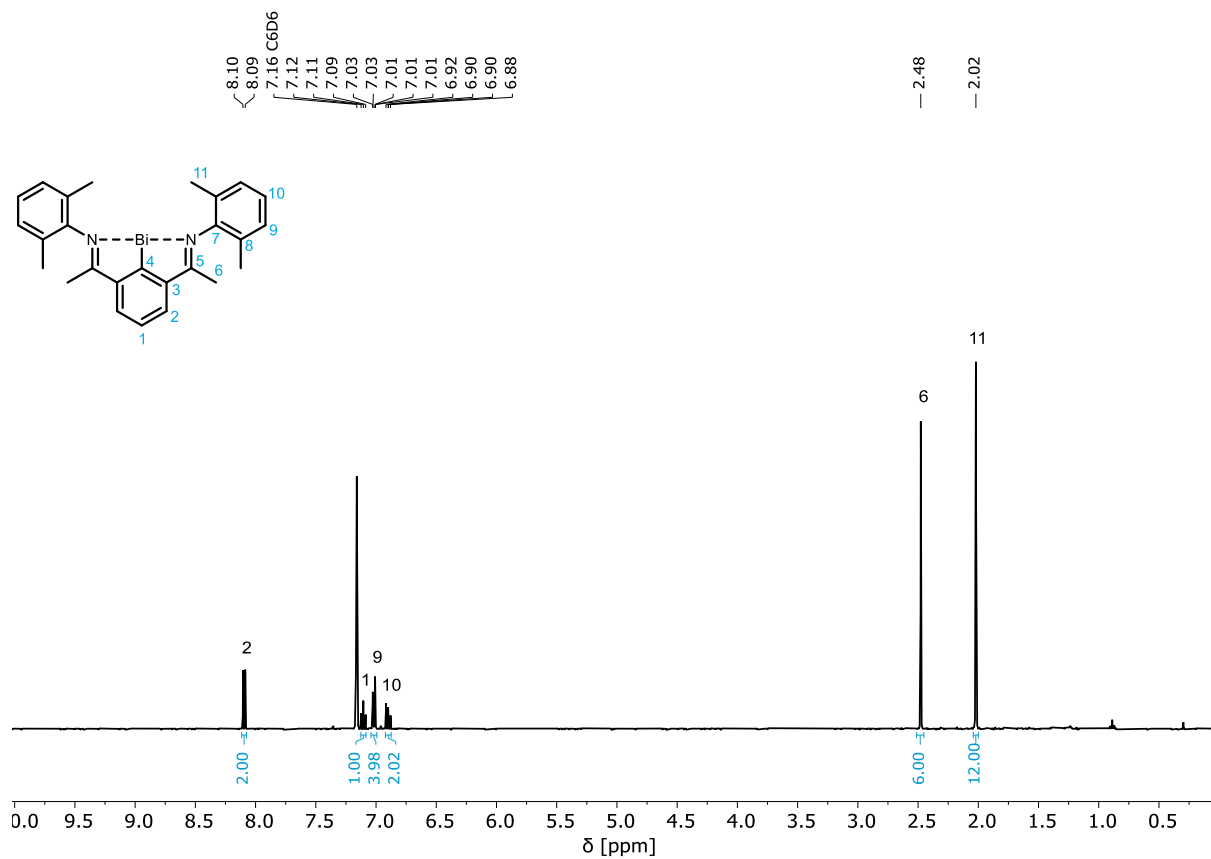

Figure S10.  $^1\text{H-NMR}$  spectrum of  $\text{LBi}$  in  $\text{C}_6\text{D}_6$  at 298 K.

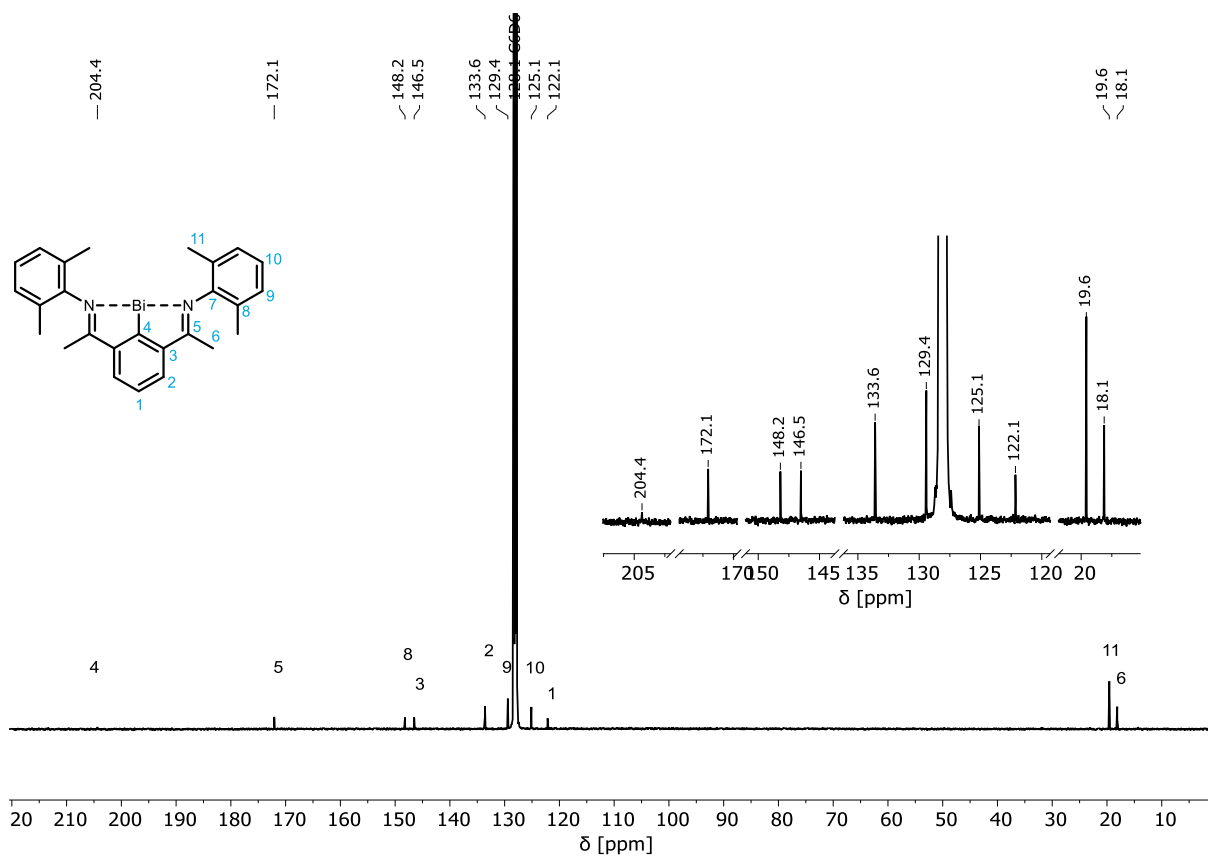

**Figure S11.**  $^{13}\text{C}\{^1\text{H}\}$ -NMR spectrum of LBi in  $\text{C}_6\text{D}_6$  at 298 K.

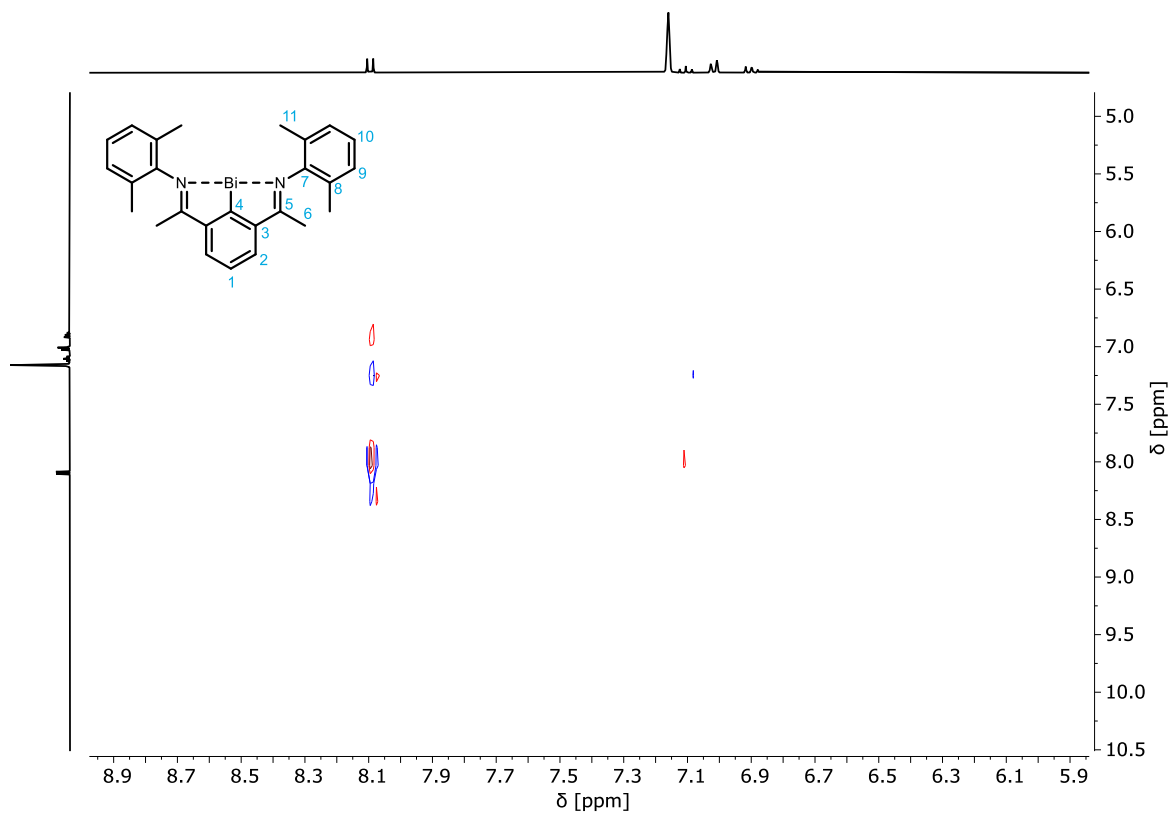

**Figure S12.**  $^1\text{H}$ -NMR COSY spectrum of LBi in  $\text{C}_6\text{D}_6$  at 298 K.

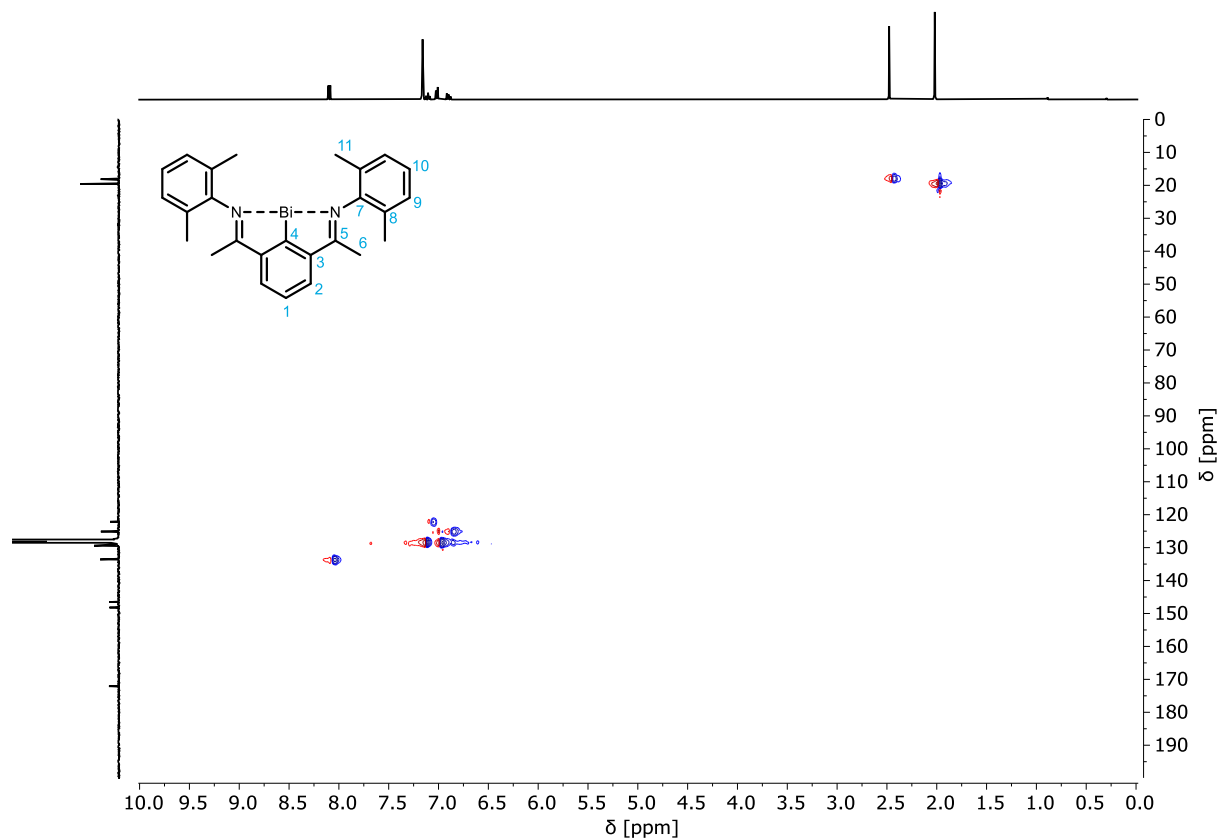

**Figure S13.**  $^1\text{H-NMR}/^{13}\text{C}\{^1\text{H}\}$ -NMR HSQC spectrum of **LBi** in  $\text{C}_6\text{D}_6$  at 298 K.

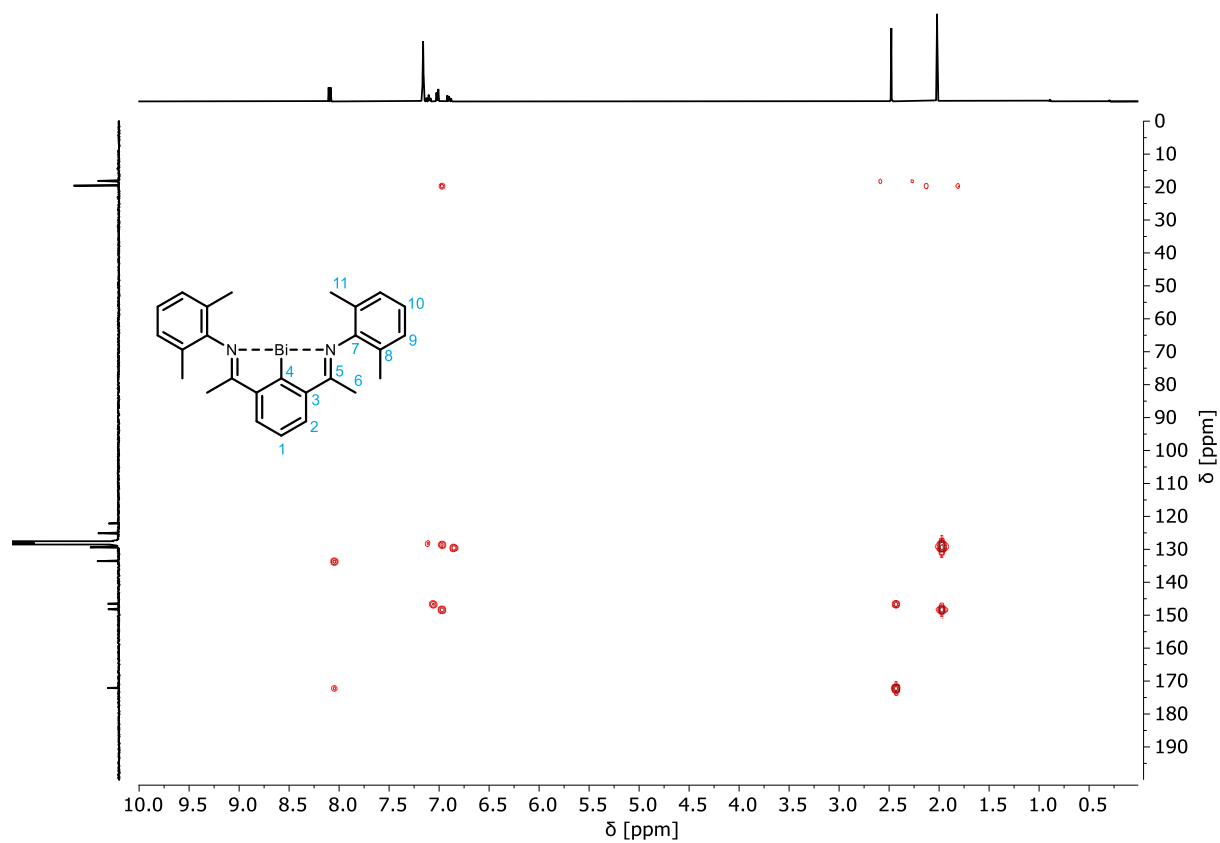

**Figure S14.**  $^1\text{H-NMR}/^{13}\text{C}\{^1\text{H}\}$ -NMR HMBC spectrum of **LBi** in  $\text{C}_6\text{D}_6$  at 298 K.

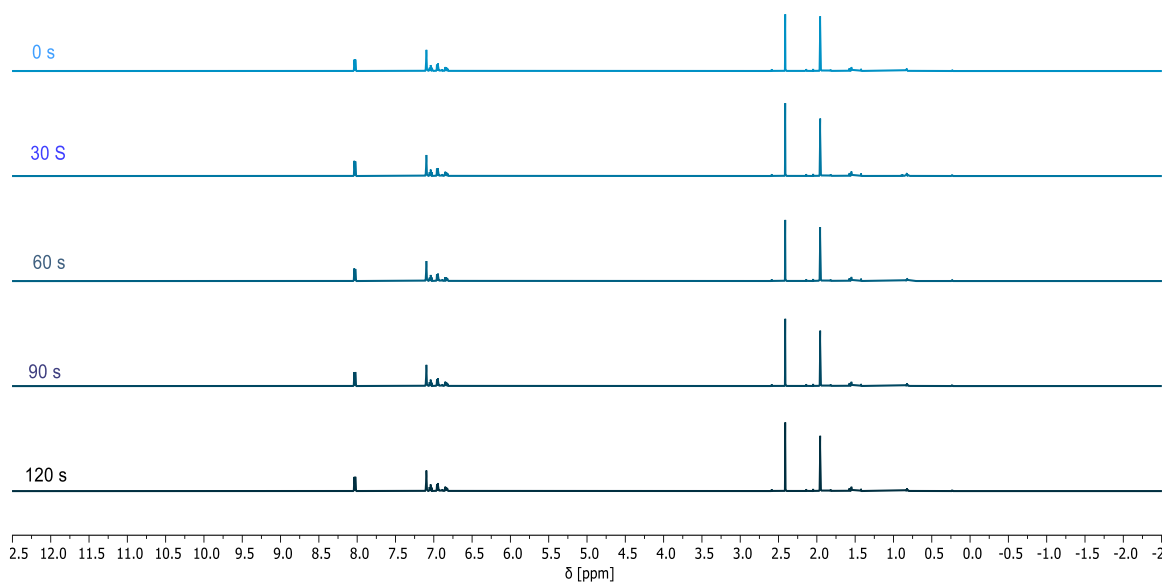

**Figure S16.** Photostability tests on LBi in C<sub>6</sub>H<sub>6</sub> at r.t. after irradiation at  $\lambda = 365$  nm (2.4 W).

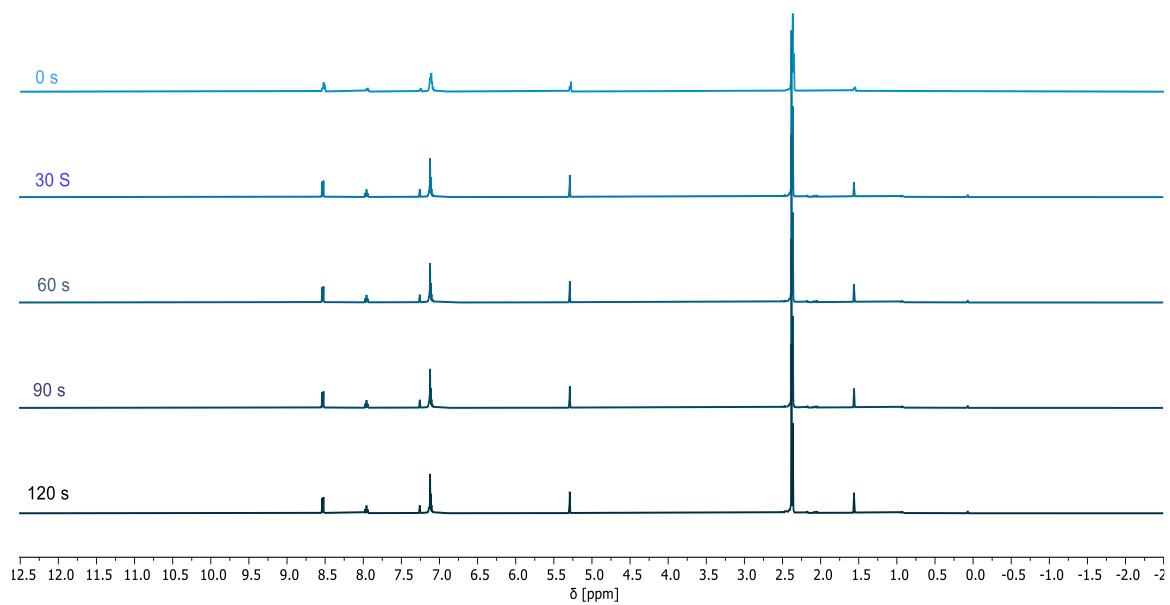

**Figure S15.** Photostability tests on LBiBr<sub>2</sub> in CD<sub>2</sub>Cl<sub>2</sub> at r.t. after irradiation at  $\lambda = 365$  nm (2.4 W).

## 5. SC-XRD

**Table S1:** Crystal data and structure refinement for **LBiBr<sub>2</sub>**.

|                                                              |                                                                                         |
|--------------------------------------------------------------|-----------------------------------------------------------------------------------------|
| Identification code                                          | KD109-NMR                                                                               |
| Empirical formula                                            | C <sub>26.25</sub> H <sub>27.5</sub> BiBr <sub>2</sub> Cl <sub>0.5</sub> N <sub>2</sub> |
| Formula weight                                               | 757.53                                                                                  |
| Temperature/K                                                | 100                                                                                     |
| Crystal system                                               | monoclinic                                                                              |
| Space group                                                  | <i>P</i> 2 <sub>1</sub> / <i>n</i>                                                      |
| <i>a</i> /Å                                                  | 13.2163(6)                                                                              |
| <i>b</i> /Å                                                  | 8.2052(2)                                                                               |
| <i>c</i> /Å                                                  | 28.5094(12)                                                                             |
| $\alpha$ /°                                                  | 90                                                                                      |
| $\beta$ /°                                                   | 96.531(4)                                                                               |
| $\gamma$ /°                                                  | 90                                                                                      |
| Volume/Å <sup>3</sup>                                        | 3071.6(2)                                                                               |
| <i>Z</i>                                                     | 4                                                                                       |
| $\rho_{\text{calc}}$ /cm <sup>-3</sup>                       | 1.638                                                                                   |
| $\mu$ /mm <sup>-1</sup>                                      | 8.399                                                                                   |
| <i>F</i> (000)                                               | 1442.0                                                                                  |
| Crystal size/mm <sup>3</sup>                                 | 0.5 × 0.183 × 0.01                                                                      |
| Radiation                                                    | Mo <i>K</i> <sub>α</sub> ( $\lambda$ = 0.71073)                                         |
| 2 $\theta$ range for data collection/°                       | 5.02 to 53                                                                              |
| Index ranges                                                 | -16 ≤ <i>h</i> ≤ 16, -10 ≤ <i>k</i> ≤ 9, -35 ≤ <i>l</i> ≤ 35                            |
| Reflections collected                                        | 13046                                                                                   |
| Independent reflections                                      | 6242 [ <i>R</i> <sub>int</sub> = 0.0460, <i>R</i> <sub>sigma</sub> = 0.0444]            |
| Data/restraints/parameters                                   | 6242/0/286                                                                              |
| Goodness-of-fit on <i>F</i> <sup>2</sup>                     | 1.068                                                                                   |
| Final <i>R</i> indexes [ <i>I</i> ≥ 2 $\sigma$ ( <i>I</i> )] | <i>R</i> <sub>1</sub> = 0.0489, <i>wR</i> <sub>2</sub> = 0.1319                         |
| Final <i>R</i> indexes [all data]                            | <i>R</i> <sub>1</sub> = 0.0640, <i>wR</i> <sub>2</sub> = 0.1454                         |
| Largest diff. peak/hole / e Å <sup>-3</sup>                  | 2.17/-2.44                                                                              |

**Table S2.** Bond lengths in the solid-state structure of **LBiBr<sub>2</sub>**.

| Atom1 | Atom2 | Length [Å] | Atom1 | Atom2 | Length [Å] | Atom1 | Atom2 | Length [Å] |
|-------|-------|------------|-------|-------|------------|-------|-------|------------|
| Bi1   | Br2   | 2.9115     | C21   | C22   | 1.4058     | C25   | C24   | 1.3662     |
| Bi1   | Br1   | 2.7577     | C3    | C2    | 1.3959     | C25   | C26   | 1.4866     |
| Bi1   | N1    | 2.4704     | C15   | H15   | 0.9299     | C14   | H14a  | 0.96       |
| Bi1   | N2    | 2.4543     | C15   | C16   | 1.3923     | C14   | H14b  | 0.9601     |
| Bi1   | C4    | 2.195      | C2    | H2    | 0.9301     | C14   | H14c  | 0.9601     |
| N1    | C5    | 1.3073     | C7    | C12   | 1.4148     | C14   | C8    | 1.5114     |
| N1    | C7    | 1.4259     | C7    | C8    | 1.3999     | C24   | H24   | 0.93       |
| N2    | C20   | 1.4496     | C12   | C13   | 1.5047     | C24   | C23   | 1.3813     |
| N2    | C18   | 1.2827     | C12   | C11   | 1.3872     | C11   | H11   | 0.9299     |
| C4    | C3    | 1.3742     | C16   | C18   | 1.4805     | C11   | C10   | 1.3925     |
| C4    | C16   | 1.4173     | C19   | H19a  | 0.9601     | C8    | C9    | 1.382      |
| C5    | C3    | 1.5        | C19   | H19b  | 0.96       | C22   | H22   | 0.93       |
| C5    | C6    | 1.4811     | C19   | H19c  | 0.9599     | C22   | C23   | 1.3636     |
| C27   | H27a  | 0.9599     | C19   | C18   | 1.4865     | C9    | H9    | 0.93       |
| C27   | H27b  | 0.9601     | C6    | H6a   | 0.96       | C9    | C10   | 1.4038     |
| C27   | H27c  | 0.9599     | C6    | H6b   | 0.96       | C26   | H26a  | 0.9601     |
| C27   | C21   | 1.5036     | C6    | H6c   | 0.9599     | C26   | H26b  | 0.96       |
| C1    | H1    | 0.9299     | C20   | C25   | 1.4295     | C26   | H26c  | 0.9598     |
| C1    | C15   | 1.3704     | C13   | H13a  | 0.96       | C23   | H23   | 0.93       |
| C1    | C2    | 1.3733     | C13   | H13b  | 0.9601     | C10   | H10   | 0.9301     |
| C21   | C20   | 1.4015     | C13   | H13c  | 0.9599     |       |       |            |

**Table S3.** Angles in the solid-state structure of **LBiBr<sub>2</sub>**.

| <b>Atom1</b> | <b>Atom2</b> | <b>Atom3</b> | <b>Angle [°]</b> | <b>Atom1</b> | <b>Atom2</b> | <b>Atom3</b> | <b>Angle [°]</b> |
|--------------|--------------|--------------|------------------|--------------|--------------|--------------|------------------|
| Br2          | Bi1          | Br1          | 168.35           | H19b         | C19          | H19c         | 109.47           |
| Br2          | Bi1          | N1           | 92.08            | H19b         | C19          | C18          | 109.47           |
| Br2          | Bi1          | N2           | 89.29            | H19c         | C19          | C18          | 109.47           |
| Br2          | Bi1          | C4           | 79.05            | C5           | C6           | H6a          | 109.46           |
| Br1          | Bi1          | N1           | 84.91            | C5           | C6           | H6b          | 109.47           |
| Br1          | Bi1          | N2           | 86.26            | C5           | C6           | H6c          | 109.48           |
| Br1          | Bi1          | C4           | 89.34            | H6a          | C6           | H6b          | 109.47           |
| N1           | Bi1          | N2           | 142.16           | H6a          | C6           | H6c          | 109.47           |
| N1           | Bi1          | C4           | 71.19            | H6b          | C6           | H6c          | 109.48           |
| N2           | Bi1          | C4           | 71.98            | N2           | C20          | C21          | 118.35           |
| Bi1          | N1           | C5           | 114.43           | N2           | C20          | C25          | 119.71           |
| Bi1          | N1           | C7           | 121.84           | C21          | C20          | C25          | 121.86           |
| C5           | N1           | C7           | 123.27           | C12          | C13          | H13a         | 109.47           |
| Bi1          | N2           | C20          | 124.89           | C12          | C13          | H13b         | 109.48           |
| Bi1          | N2           | C18          | 114.14           | C12          | C13          | H13c         | 109.47           |
| C20          | N2           | C18          | 120.95           | H13a         | C13          | H13b         | 109.46           |
| Bi1          | C4           | C3           | 119.84           | H13a         | C13          | H13c         | 109.47           |
| Bi1          | C4           | C16          | 117.44           | H13b         | C13          | H13c         | 109.48           |
| C3           | C4           | C16          | 122.63           | C20          | C25          | C24          | 117.23           |
| N1           | C5           | C3           | 115.81           | C20          | C25          | C26          | 121.66           |
| N1           | C5           | C6           | 125.39           | C24          | C25          | C26          | 121.11           |
| C3           | C5           | C6           | 118.8            | N2           | C18          | C16          | 117.25           |
| H27a         | C27          | H27b         | 109.47           | N2           | C18          | C19          | 125.13           |
| H27a         | C27          | H27c         | 109.48           | C16          | C18          | C19          | 117.6            |
| H27a         | C27          | C21          | 109.47           | H14a         | C14          | H14b         | 109.47           |
| H27b         | C27          | H27c         | 109.47           | H14a         | C14          | H14c         | 109.48           |
| H27b         | C27          | C21          | 109.47           | H14a         | C14          | C8           | 109.47           |
| H27c         | C27          | C21          | 109.47           | H14b         | C14          | H14c         | 109.47           |
| H1           | C1           | C15          | 119.35           | H14b         | C14          | C8           | 109.46           |
| H1           | C1           | C2           | 119.35           | H14c         | C14          | C8           | 109.47           |
| C15          | C1           | C2           | 121.3            | C25          | C24          | H24          | 118.52           |
| C27          | C21          | C20          | 123.21           | C25          | C24          | C23          | 122.95           |
| C27          | C21          | C22          | 120.68           | H24          | C24          | C23          | 118.53           |
| C20          | C21          | C22          | 116.09           | C12          | C11          | H11          | 119.2            |
| C4           | C3           | C5           | 118.48           | C12          | C11          | C10          | 121.59           |
| C4           | C3           | C2           | 118.76           | H11          | C11          | C10          | 119.2            |
| C5           | C3           | C2           | 122.76           | C7           | C8           | C14          | 122.67           |
| C1           | C15          | H15          | 119.28           | C7           | C8           | C9           | 119.25           |
| C1           | C15          | C16          | 121.44           | C14          | C8           | C9           | 118.05           |
| H15          | C15          | C16          | 119.28           | C21          | C22          | H22          | 118.34           |
| C1           | C2           | C3           | 119.61           | C21          | C22          | C23          | 123.32           |
| C1           | C2           | H2           | 120.18           | H22          | C22          | C23          | 118.34           |
| C3           | C2           | H2           | 120.21           | C8           | C9           | H9           | 119.5            |
| N1           | C7           | C12          | 117              | C8           | C9           | C10          | 121              |
| N1           | C7           | C8           | 121.67           | H9           | C9           | C10          | 119.5            |
| C12          | C7           | C8           | 120.82           | C25          | C26          | H26a         | 109.47           |
| C7           | C12          | C13          | 122.43           | C25          | C26          | H26b         | 109.47           |
| C7           | C12          | C11          | 118.31           | C25          | C26          | H26c         | 109.48           |
| C13          | C12          | C11          | 119.22           | H26a         | C26          | H26b         | 109.46           |
| C4           | C16          | C15          | 116.24           | H26a         | C26          | H26c         | 109.49           |
| C4           | C16          | C18          | 118.22           | H26b         | C26          | H26c         | 109.47           |
| C15          | C16          | C18          | 125.43           | C24          | C23          | C22          | 118.49           |
| H19a         | C19          | H19b         | 109.47           | C24          | C23          | H23          | 120.76           |
| H19a         | C19          | H19c         | 109.48           | C22          | C23          | H23          | 120.76           |
| H19a         | C19          | C18          | 109.46           | C11          | C10          | C9           | 118.97           |



**Table S4.** Contact lengths in the solid-state structure of **LBiBr<sub>2</sub>**.

| Atom1 | Atom2 | Length [Å] |
|-------|-------|------------|
| H19b  | Br2   | 2.905      |
| H22   | Br1   | 2.896      |
| H14b  | C10   | 2.895      |
| C1    | C1    | 3.392      |
| C1    | H1    | 2.863      |
| Br2   | H2    | 2.93       |
| C1    | H6a   | 2.761      |
| C2    | H6a   | 2.875      |

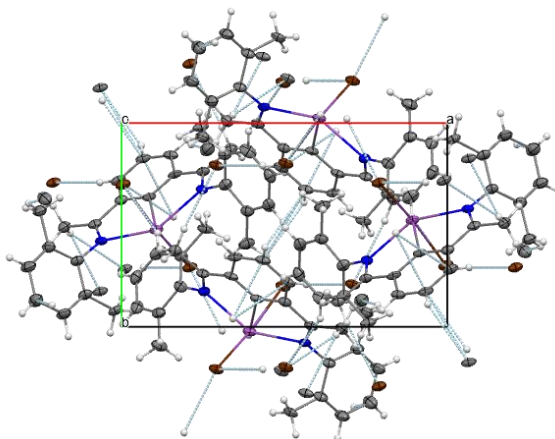

**Figure S17.** Solid state packing of **LBiBr<sub>2</sub>** viewed along the *c*-axis.

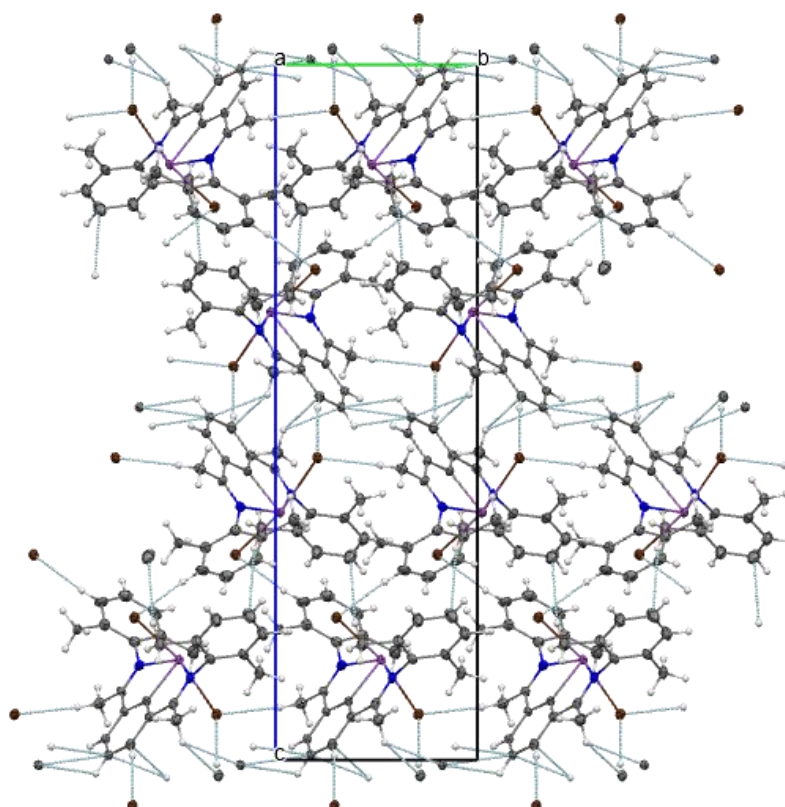

**Figure S18.** Solid state packing of **LBiBr<sub>2</sub>** viewed along the *a*-axis.

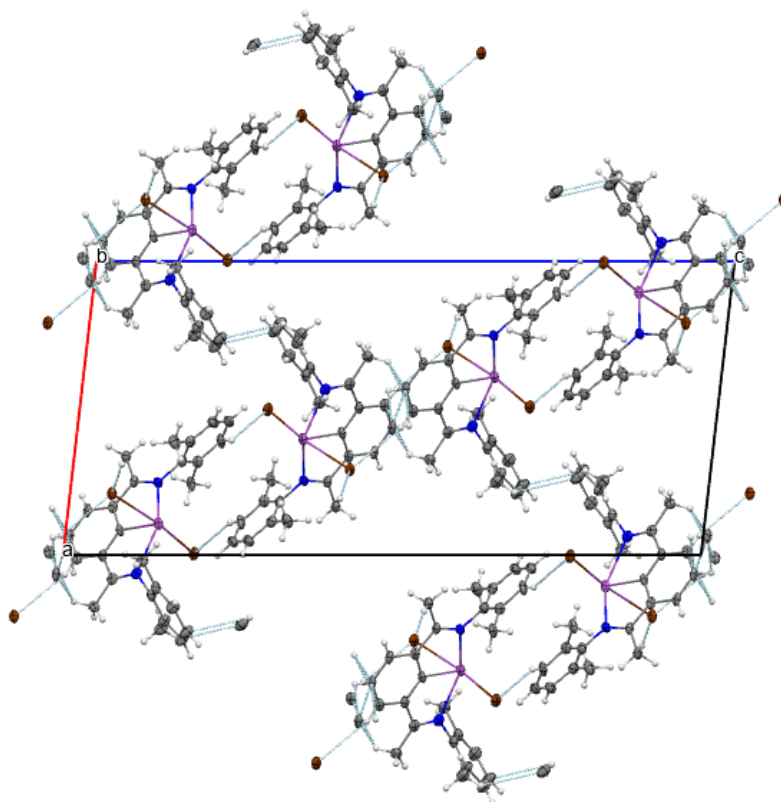

**Figure S19.** Solid state packing of **LBiBr<sub>2</sub>** viewed along the *b*-axis.

The bismuth ion itself does not engage in intermolecular interactions, and these are instead restricted to the N,C,N pincer ligand L and the bromide ligands. These include a methyl group from the imine forming an H-arene interaction with the central phenyl ring  $d(\text{C1}\cdots\text{H6a}) = 2.761(8) \text{ \AA}$ , as well as halide-H interactions with  $d(\text{Br1}\cdots\text{H22}) = 2.8959(8) \text{ \AA}$ ,  $d(\text{Br2}\cdots\text{H19b}) = 2.9048(8) \text{ \AA}$  and  $d(\text{Br2}\cdots\text{H2}) = 2.9303(9) \text{ \AA}$ . The  $\text{Bi}^{3+}$  center is coordinated in a distorted square pyramidal geometry, (refer to Figure 1c) in which the halides and nitrogen atoms are positioned mutually *trans* to each other, constructing the base of the pyramid, while the carbon atom occupies the apical coordination site. Distortion from the pyramidal coordination is evidenced by the angles of  $\angle(\text{N1-Bi1-N2}) = 142.2(2)^\circ$  and  $\angle(\text{Br1-Bi1-Br2}) = 168.35(3)^\circ$ . The xyllyl substituents are twisted slightly out of plane, with one methyl group closer to the respective bromide ligand. The Bi-N distances of  $d(\text{Bi-N1}) = 2.479(7) \text{ \AA}$  and  $d(\text{Bi-N2}) = 2.454(6) \text{ \AA}$  are significantly smaller than the sum of the van der Waals radii, confirming coordination and providing the  $\text{Bi}^{3+}$  ion with 12 valence electrons. Interestingly, there is an asymmetry in the Bi-Br distances, with one measuring  $d(\text{Bi1-Br1}) = 2.7576(9) \text{ \AA}$  as opposed to  $d(\text{Bi1-Br2}) = 2.9116(9) \text{ \AA}$ , and this highlights the exceptional steric shielding of the  $\text{Bi}^{3+}$  ion in this system.

**Table S5.** Crystal data and structure refinement for **LBr**.

|                                                              |                                                                              |
|--------------------------------------------------------------|------------------------------------------------------------------------------|
| Identification code                                          | KD102                                                                        |
| Empirical formula                                            | C <sub>26</sub> H <sub>27</sub> BrN <sub>2</sub>                             |
| Formula weight                                               | 447.40                                                                       |
| Temperature/K                                                | 100                                                                          |
| Crystal system                                               | orthorhombic                                                                 |
| Space group                                                  | <i>P</i> 2 <sub>1</sub> 2 <sub>1</sub> 2 <sub>1</sub>                        |
| <i>a</i> /Å                                                  | 8.5116(9)                                                                    |
| <i>b</i> /Å                                                  | 10.8836(11)                                                                  |
| <i>c</i> /Å                                                  | 24.405(3)                                                                    |
| $\alpha$ /°                                                  | 90                                                                           |
| $\beta$ /°                                                   | 90                                                                           |
| $\gamma$ /°                                                  | 90                                                                           |
| Volume/Å <sup>3</sup>                                        | 2260.8(4)                                                                    |
| <i>Z</i>                                                     | 4                                                                            |
| $\rho_{\text{calc}}$ g/cm <sup>3</sup>                       | 1.314                                                                        |
| $\mu$ /mm <sup>-1</sup>                                      | 1.832                                                                        |
| <i>F</i> (000)                                               | 928.0                                                                        |
| Crystal size/mm <sup>3</sup>                                 | 0.5 × 0.367 × 0.25                                                           |
| Radiation                                                    | Mo K $\alpha$ ( $\lambda$ = 0.71073)                                         |
| 2 $\theta$ range for data collection/°                       | 5.068 to 55.262                                                              |
| Index ranges                                                 | -11 ≤ <i>h</i> ≤ 10, -14 ≤ <i>k</i> ≤ 12, -27 ≤ <i>l</i> ≤ 31                |
| Reflections collected                                        | 9226                                                                         |
| Independent reflections                                      | 5108 [ <i>R</i> <sub>int</sub> = 0.0186, <i>R</i> <sub>sigma</sub> = 0.0222] |
| Data/restraints/parameters                                   | 5108/0/269                                                                   |
| Goodness-of-fit on <i>F</i> <sub>2</sub>                     | 1.086                                                                        |
| Final <i>R</i> indexes [ <i>I</i> ≥ 2 $\sigma$ ( <i>I</i> )] | <i>R</i> <sub>1</sub> = 0.0302, <i>wR</i> <sub>2</sub> = 0.0640              |
| Final <i>R</i> indexes [all data]                            | <i>R</i> <sub>1</sub> = 0.0375, <i>wR</i> <sub>2</sub> = 0.0682              |
| Largest diff. peak/hole / e <sup>-</sup> Å <sup>-3</sup>     | 0.43/-0.28                                                                   |
| Flack parameter                                              | 0.020(6)                                                                     |

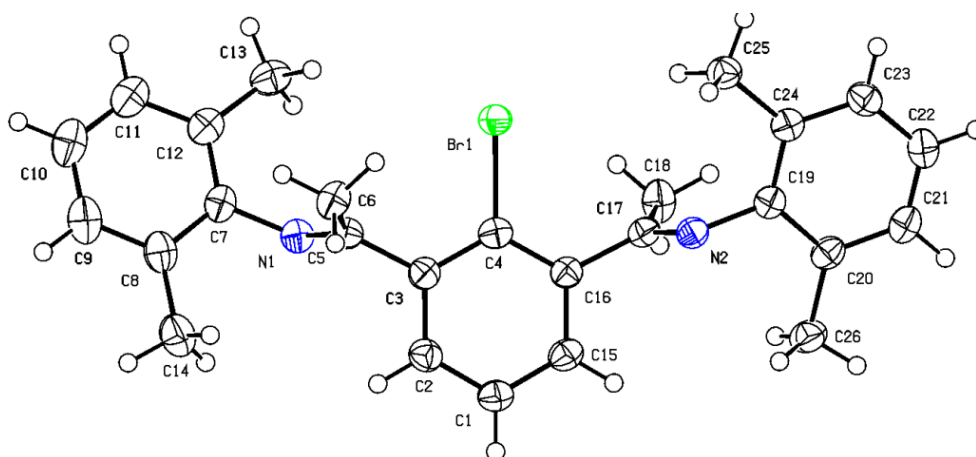

**Figure S20.** ORTEP plots and atom numbering of **LBr**. Thermal displacement ellipsoids are displayed at the 50% probability level.

**Table S6.** Bond lengths in the solid-state structure of LBr.

| Atom1 | Atom2 | Length [Å] | Atom1 | Atom2 | Length [Å] | Atom1 | Atom2 | Length [Å] |
|-------|-------|------------|-------|-------|------------|-------|-------|------------|
| Br1   | C4    | 1.924(3)   | C2    | H2    | 0.950      | C18   | H18C  | 0.980      |
| N2    | C19   | 1.429(5)   | C2    | C1    | 1.382(5)   | C11   | H11   | 0.950      |
| N2    | C17   | 1.269(5)   | C24   | C23   | 1.386(5)   | C11   | C10   | 1.387(6)   |
| N1    | C5    | 1.269(4)   | C24   | C25   | 1.506(5)   | C25   | H25A  | 0.980      |
| N1    | C7    | 1.431(4)   | C12   | C11   | 1.393(6)   | C25   | H25B  | 0.980      |
| C16   | C17   | 1.504(5)   | C12   | C13   | 1.504(6)   | C25   | H25C  | 0.980      |
| C16   | C4    | 1.391(5)   | C20   | C21   | 1.399(5)   | C8    | C9    | 1.401(6)   |
| C16   | C15   | 1.397(5)   | C20   | C26   | 1.505(5)   | C8    | C14   | 1.501(6)   |
| C19   | C24   | 1.403(5)   | C23   | H23   | 0.950      | C22   | H22   | 0.950      |
| C19   | C20   | 1.397(5)   | C23   | C22   | 1.391(6)   | C10   | H10   | 0.949      |
| C17   | C18   | 1.512(5)   | C21   | H21   | 0.950      | C10   | C9    | 1.389(6)   |
| C3    | C4    | 1.398(5)   | C21   | C22   | 1.380(6)   | C13   | H13A  | 0.980      |
| C3    | C5    | 1.504(5)   | C15   | H15   | 0.950      | C13   | H13B  | 0.980      |
| C3    | C2    | 1.393(5)   | C15   | C1    | 1.390(5)   | C13   | H13C  | 0.980      |
| C5    | C6    | 1.512(5)   | C1    | H1    | 0.950      | C9    | H9    | 0.950      |
| C7    | C12   | 1.403(5)   | C26   | H26A  | 0.980      | C14   | H14A  | 0.980      |
| C7    | C8    | 1.398(5)   | C26   | H26B  | 0.980      | C14   | H14B  | 0.980      |
| C6    | H6A   | 0.980      | C26   | H26C  | 0.980      | C14   | H14C  | 0.980      |
| C6    | H6B   | 0.980      | C18   | H18A  | 0.980      |       |       |            |
| C6    | H6C   | 0.980      | C18   | H18B  | 0.980      |       |       |            |

**Table S7.** Angles in the solid-state structure of LBr.

| Atom1 | Atom2 | Atom3 | Angle [°] | Atom1 | Atom2 | Atom3 | Angle [°] |
|-------|-------|-------|-----------|-------|-------|-------|-----------|
| C19   | N2    | C17   | 119.5(3)  | H15   | C15   | C1    | 119.7     |
| C5    | N1    | C7    | 119.7(3)  | C2    | C1    | C15   | 120.0(3)  |
| C17   | C16   | C4    | 124.1(3)  | C2    | C1    | H1    | 120.0     |
| C17   | C16   | C15   | 117.7(3)  | C15   | C1    | H1    | 120.0     |
| C4    | C16   | C15   | 118.2(3)  | C20   | C26   | H26A  | 109.4     |
| N2    | C19   | C24   | 120.0(3)  | C20   | C26   | H26B  | 109.5     |
| N2    | C19   | C20   | 118.4(3)  | C20   | C26   | H26C  | 109.4     |
| C24   | C19   | C20   | 121.4(3)  | H26A  | C26   | H26B  | 109.5     |
| N2    | C17   | C16   | 117.0(3)  | H26A  | C26   | H26C  | 109.5     |
| N2    | C17   | C18   | 126.7(3)  | H26B  | C26   | H26C  | 109.5     |
| C16   | C17   | C18   | 116.1(3)  | C17   | C18   | H18A  | 109.5     |
| C4    | C3    | C5    | 123.7(3)  | C17   | C18   | H18B  | 109.4     |
| C4    | C3    | C2    | 118.3(3)  | C17   | C18   | H18C  | 109.5     |
| C5    | C3    | C2    | 118.0(3)  | H18A  | C18   | H18B  | 109.5     |
| Br1   | C4    | C16   | 118.8(3)  | H18A  | C18   | H18C  | 109.5     |
| Br1   | C4    | C3    | 119.2(3)  | H18B  | C18   | H18C  | 109.5     |
| C16   | C4    | C3    | 122.0(3)  | C12   | C11   | H11   | 119.2     |
| N1    | C5    | C3    | 117.0(3)  | C12   | C11   | C10   | 121.5(4)  |
| N1    | C5    | C6    | 127.0(3)  | H11   | C11   | C10   | 119.2     |
| C3    | C5    | C6    | 115.7(3)  | C24   | C25   | H25A  | 109.5     |
| N1    | C7    | C12   | 118.7(3)  | C24   | C25   | H25B  | 109.5     |
| N1    | C7    | C8    | 119.2(3)  | C24   | C25   | H25C  | 109.5     |
| C12   | C7    | C8    | 121.9(3)  | H25A  | C25   | H25B  | 109.5     |
| C5    | C6    | H6A   | 109.5     | H25A  | C25   | H25C  | 109.5     |
| C5    | C6    | H6B   | 109.4     | H25B  | C25   | H25C  | 109.5     |
| C5    | C6    | H6C   | 109.5     | C7    | C8    | C9    | 118.0(3)  |
| H6A   | C6    | H6B   | 109.5     | C7    | C8    | C14   | 120.5(3)  |
| H6A   | C6    | H6C   | 109.5     | C9    | C8    | C14   | 121.4(3)  |
| H6B   | C6    | H6C   | 109.5     | C23   | C22   | C21   | 119.7(4)  |
| C3    | C2    | H2    | 119.6     | C23   | C22   | H22   | 120.2     |
| C3    | C2    | C1    | 120.8(3)  | C21   | C22   | H22   | 120.1     |
| H2    | C2    | C1    | 119.6     | C11   | C10   | H10   | 120.3     |
| C19   | C24   | C23   | 118.4(3)  | C11   | C10   | C9    | 119.4(4)  |
| C19   | C24   | C25   | 120.3(3)  | H10   | C10   | C9    | 120.3     |
| C23   | C24   | C25   | 121.3(3)  | C12   | C13   | H13A  | 109.5     |
| C7    | C12   | C11   | 117.9(3)  | C12   | C13   | H13B  | 109.5     |
| C7    | C12   | C13   | 120.4(3)  | C12   | C13   | H13C  | 109.5     |
| C11   | C12   | C13   | 121.6(3)  | H13A  | C13   | H13B  | 109.4     |
| C19   | C20   | C21   | 118.3(3)  | H13A  | C13   | H13C  | 109.5     |
| C19   | C20   | C26   | 120.5(3)  | H13B  | C13   | H13C  | 109.5     |
| C21   | C20   | C26   | 121.2(3)  | C8    | C9    | C10   | 121.1(4)  |
| C24   | C23   | H23   | 119.4     | C8    | C9    | H9    | 119.5     |
| C24   | C23   | C22   | 121.1(3)  | C10   | C9    | H9    | 119.4     |
| H23   | C23   | C22   | 119.4     | C8    | C14   | H14A  | 109.4     |
| C20   | C21   | H21   | 119.5     | C8    | C14   | H14B  | 109.5     |

|     |     |     |          |      |     |      |       |
|-----|-----|-----|----------|------|-----|------|-------|
| C20 | C21 | C22 | 121.1(4) | C8   | C14 | H14C | 109.5 |
| H21 | C21 | C22 | 119.4    | H14A | C14 | H14B | 109.5 |
| C16 | C15 | H15 | 119.7    | H14A | C14 | H14C | 109.4 |
| C16 | C15 | C1  | 120.6(3) | H14B | C14 | H14C | 109.5 |

Table S8. Contact lengths in the solid-state structure of **LBr**.

| Atom1 | Atom2 | Length [Å] |
|-------|-------|------------|
| H1    | C12   | 2.895      |
| H18B  | C11   | 2.842      |

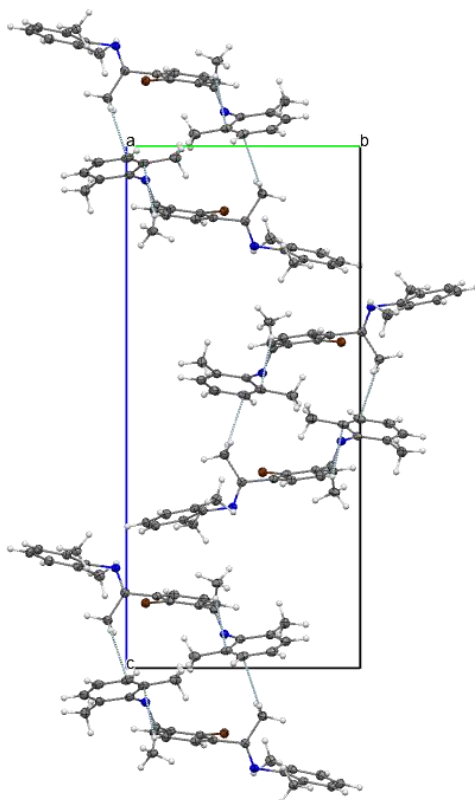

Figure S21. Solid state packing of **LBr** viewed along the *a*-axis.

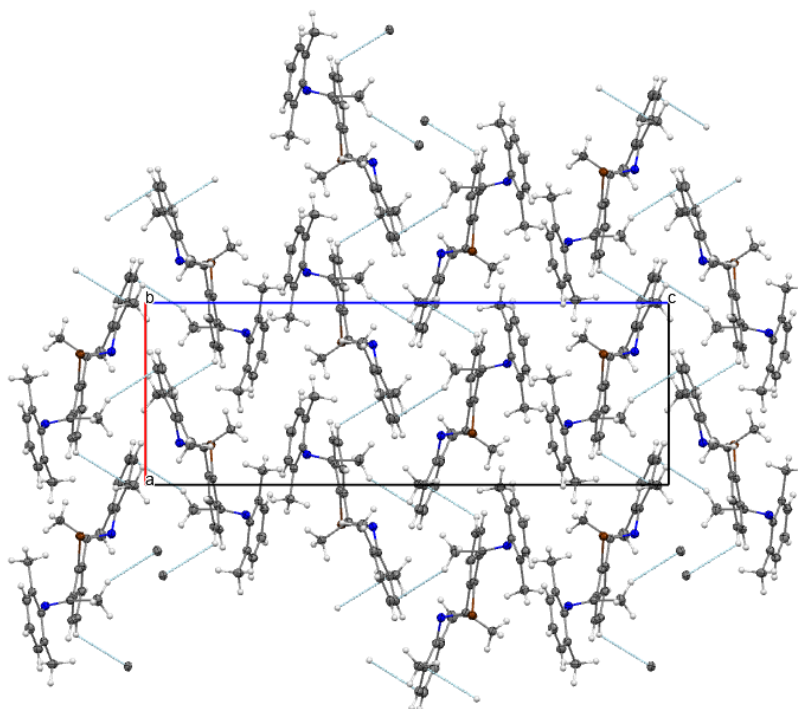

**Figure S22.** Solid state packing of **LBr** viewed along the *b*-axis.

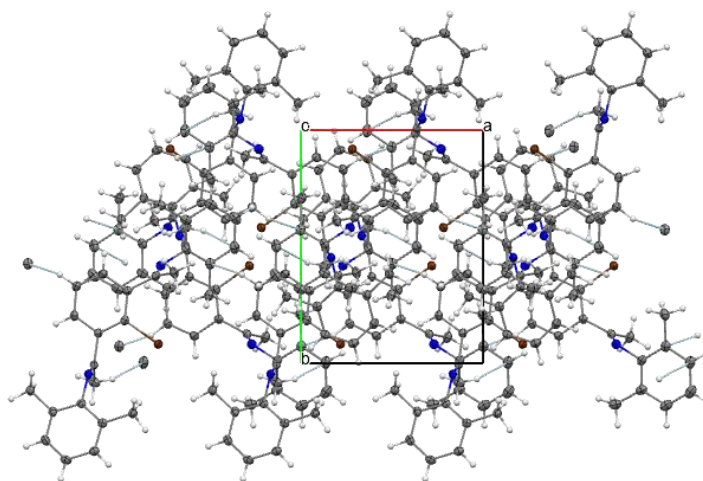

**Figure S23.** Solid state packing of **LBr** viewed along the *c*-axis.

## 6. UV-Vis Spectroscopy

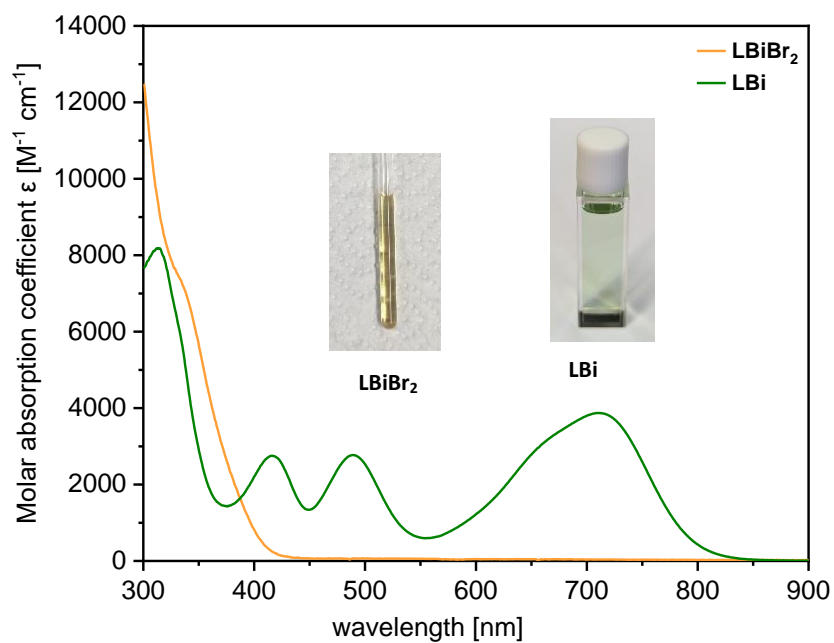

**Figure S24.** UV-Vis absorption spectra of LBi (green) in benzene and LBiBr<sub>2</sub> (orange) in CH<sub>2</sub>Cl<sub>2</sub>.

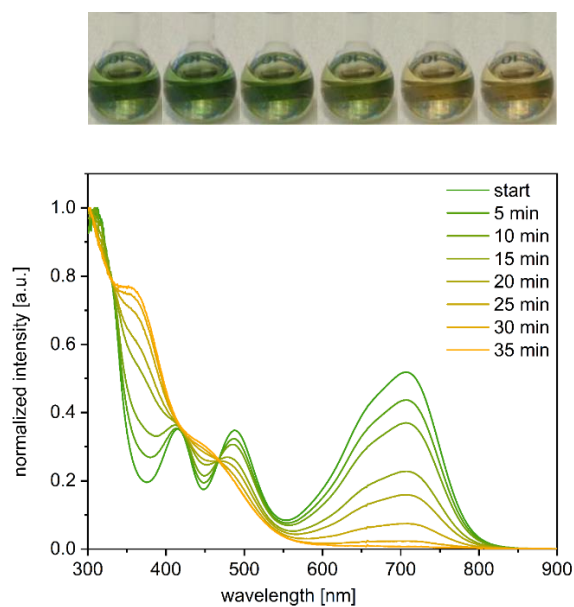

**Figure S25.** Degradation of LBi over the course of 35 minutes as monitored by UV-Vis absorption spectroscopy (bottom), as well as photographs of the corresponding stock solution taken every seven minutes.

## 7. Photoluminescence Measurements

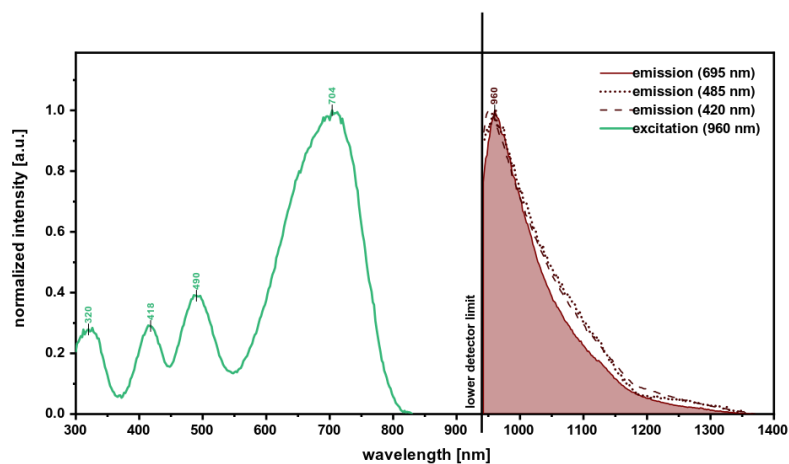

**Figure S26.** Photoluminescence and excitation spectrum of **LBi** in THF at r.t. under vacuum (left). Monoxponential decay and fitting of the time-resolved emission decay of the phosphorescent NIR emission of **LBi** in THF at r.t. Excitation occurred at differing wavelengths and detection at  $\lambda_{det} = 960$  nm (right).

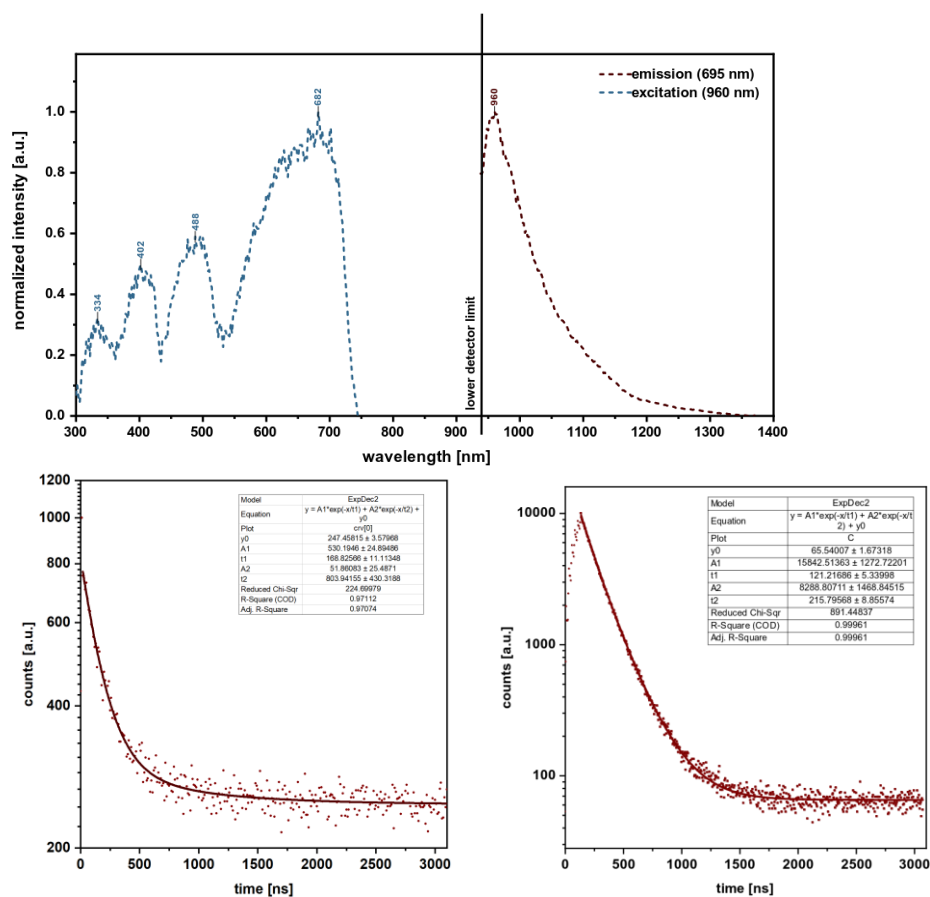

**Figure S27.** Photoluminescence and excitation spectrum of **LBi** in 2-MeTHF at  $T = 77$  K (left). Biexponential decay and fitting of the time-resolved emission decay of the NIR phosphorescent emission of **LBi** in 2-MeTHF at 77 K. Excitation occurred at  $\lambda_{exc} = 420$  nm and detection at  $\lambda_{det} = 960$  nm (right, top). Biexponential decay and fitting of the time-resolved emission decay of the NIR phosphorescent emission of **LBi** in 2-MeTHF at 77 K. Excitation occurred at  $\lambda_{exc} = 485$  nm and detection at  $\lambda_{det} = 960$  nm (left, bottom).



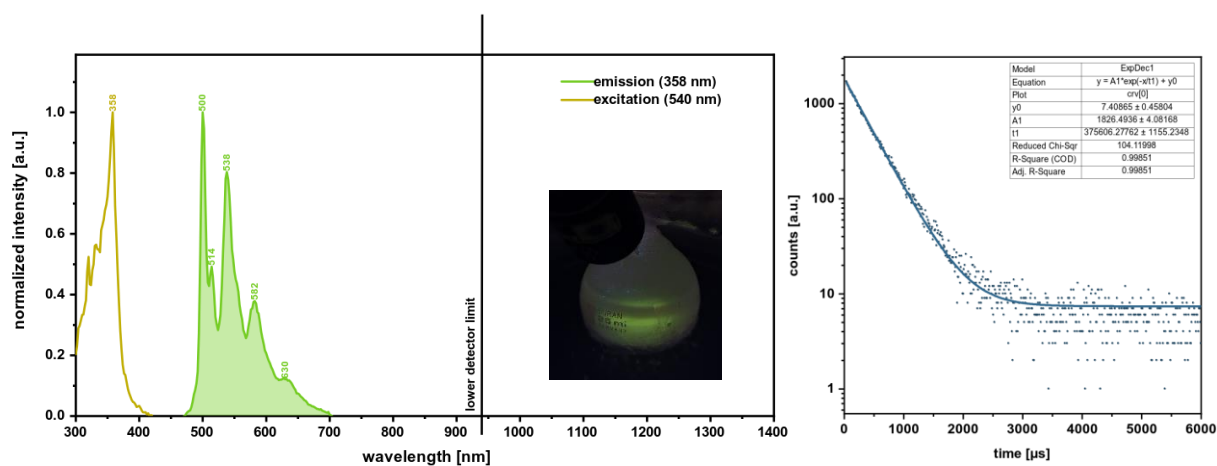

**Figure S28.** Photoluminescence and excitation spectrum of  $\text{LBiBr}_2$  in 2-MeTHF at  $T = 77$  K (left). Monoxponential decay and fitting of the time-resolved emission decay of the phosphorescent emission of  $\text{LBiBr}_2$  in 2-MeTHF at 77 K. Excitation occurred at  $\lambda_{\text{exc}} = 358$  nm and detection at  $\lambda_{\text{det}} = 500$  nm (right).

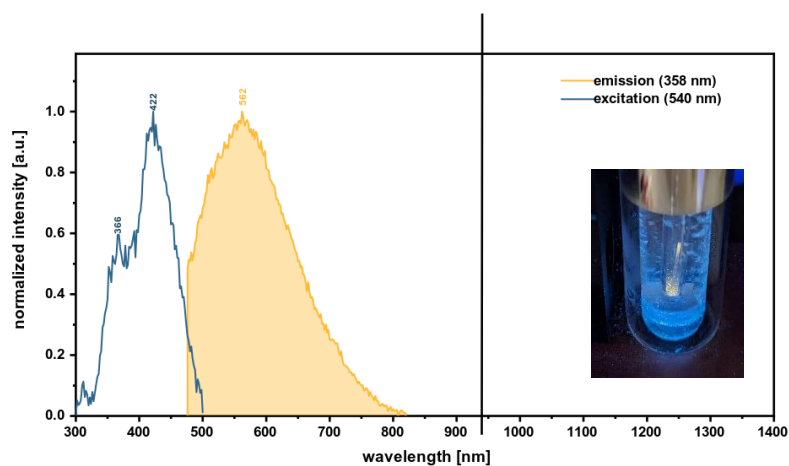

**Figure S29.** Photoluminescence and excitation spectrum of  $\text{LBiBr}_2$  as a powder at  $T = 77$  K. Note: the wide spectrum and resulting necessity for wide detection band gaps (11 nm) is a result of the weak intensity of this emission.

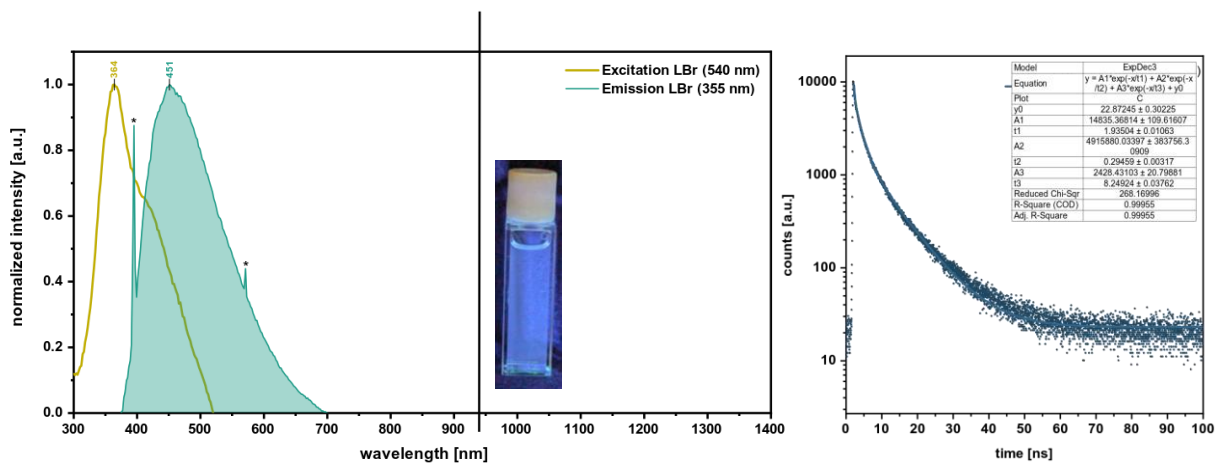

**Figure S30.** Photoluminescence and excitation spectrum of **LBr** THF at r.t. The QY of this emission is <1%. Note: asterisks mark artefacts that arise from the laser (left). Exponential decay and fitting of the time-resolved emission decay of the emission of **LBr** in THF at r.t. Excitation occurred at  $\lambda_{exc} = 355$  nm and detection at  $\lambda_{det} = 450$  nm (right). The QY of this emission is <1%.

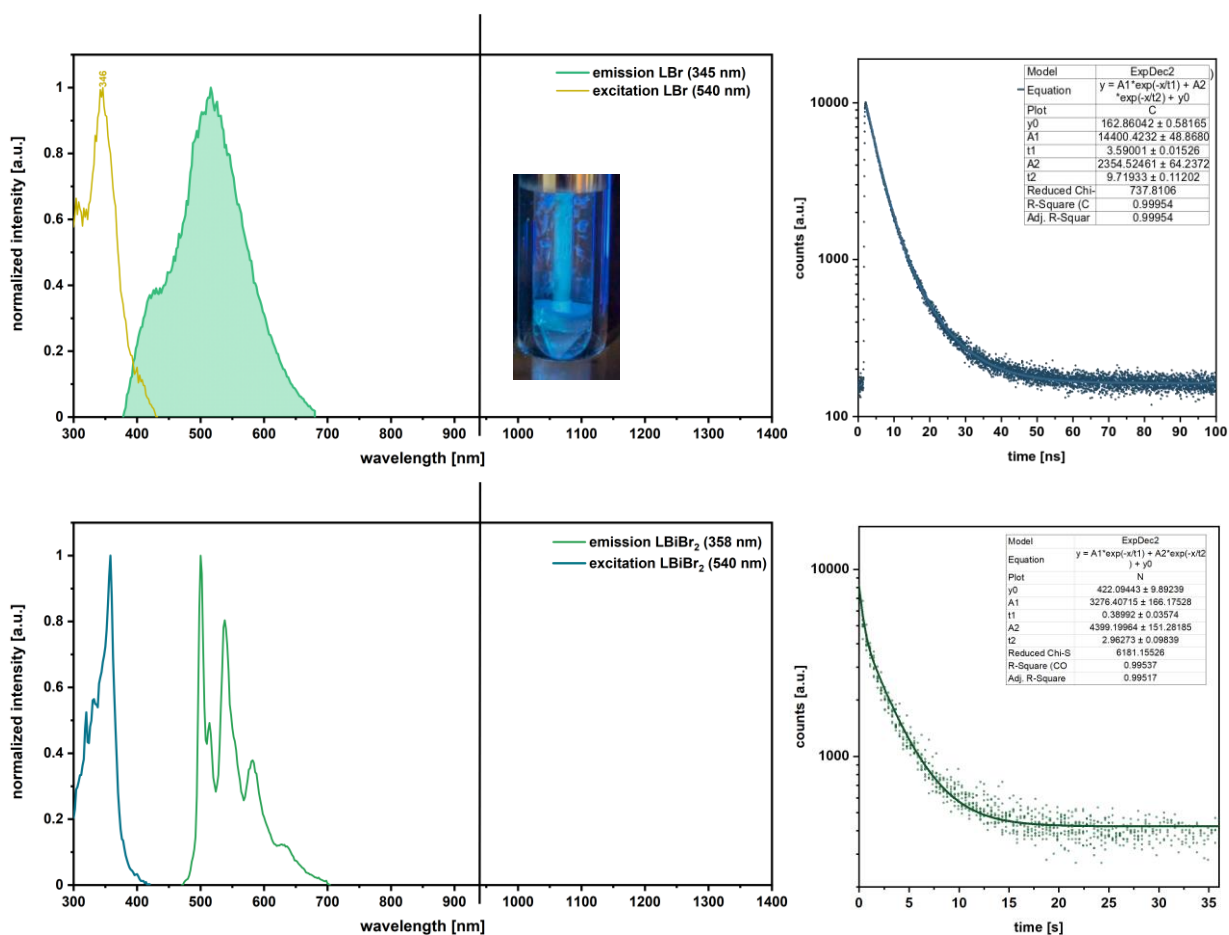

**Figure S31.** Photoluminescence and excitation spectrum of **LBr** 2-MeTHF at  $T = 77$  K (top left) in comparison with the photoluminescence spectra of **LBiBr<sub>2</sub>** in 2-MeTHF at  $T = 77$  K (bottom left). Exponential decay and fitting of the time-resolved emission decay of the fluorescence of **LBr** in 2-MeTHF at 77K (top right) and exponential decay and fitting of the time-resolved emission decay of the phosphorescence of **LBr** in 2-MeTHF at 77K (bottom right). Excitation for both emission decay curves occurred at  $\lambda_{exc} = 355$  nm. The detection of the phosphorescence occurred at  $\lambda_{det} = 570$  nm, while the detection of the phosphorescence occurred at  $\lambda_{det} = 516$  nm.

## 8. TD-DFT Calculations

**Table S9.** Atomic coordinates of **LBiBr<sub>2</sub>** for TD-DFT calculations using the Gaussian 16 program package.

|   |          |          |          |
|---|----------|----------|----------|
| C | -0.00005 | 1.74146  | 0.68353  |
| C | 3.49271  | -0.41126 | -0.02289 |
| C | -2.46976 | 1.63274  | 0.65809  |
| C | -3.49286 | -0.41125 | -0.02284 |
| N | 2.36896  | 0.44776  | 0.15225  |
| C | -1.21648 | 2.36628  | 0.95136  |
| N | -2.36911 | 0.44775  | 0.15233  |
| C | 3.77655  | 2.30210  | 0.94614  |
| H | 3.86139  | 2.54860  | 2.01006  |
| H | 3.83059  | 3.24480  | 0.38983  |
| H | 4.61988  | 1.67406  | 0.65740  |
| C | -3.93330 | -0.71311 | -1.32387 |
| C | -0.00004 | 4.28388  | 1.78497  |
| H | -0.00004 | 5.27888  | 2.21870  |
| C | 1.21639  | 2.36632  | 0.95127  |
| C | 3.67223  | -0.68958 | 2.50667  |
| H | 4.09269  | -1.42267 | 3.20121  |
| H | 2.58272  | -0.71072 | 2.60862  |
| H | 4.02130  | 0.29864  | 2.83161  |
| C | 1.20948  | 3.65169  | 1.51113  |
| H | 2.13809  | 4.16599  | 1.73866  |
| C | -4.99213 | -1.60747 | -1.47818 |
| H | -5.34147 | -1.82757 | -2.48527 |
| C | 2.46964  | 1.63279  | 0.65792  |
| C | 3.93303  | -0.71337 | -1.32391 |
| C | 5.15335  | -1.89725 | 0.88646  |
| H | 5.62513  | -2.35581 | 1.75353  |
| C | -1.20956 | 3.65165  | 1.51123  |
| H | -2.13817 | 4.16592  | 1.73883  |
| C | 4.10468  | -1.00050 | 1.10093  |
| C | 5.61209  | -2.22065 | -0.38946 |
| C | 3.31031  | -0.07147 | -2.52846 |
| H | 2.27273  | -0.39242 | -2.67724 |
| H | 3.86958  | -0.32836 | -3.43274 |
| H | 3.27740  | 1.01977  | -2.44178 |
| C | -5.15336 | -1.89746 | 0.88639  |
| H | -5.62504 | -2.35620 | 1.75342  |
| C | 4.99188  | -1.60771 | -1.47815 |
| H | 5.34113  | -1.82800 | -2.48523 |
| C | -4.10471 | -1.00070 | 1.10093  |
| C | -5.61219 | -2.22065 | -0.38955 |
| C | -3.77666 | 2.30201  | 0.94648  |
| H | -4.61999 | 1.67397  | 0.65776  |
| H | -3.83078 | 3.24476  | 0.39025  |
| H | -3.86141 | 2.54840  | 2.01043  |

|    |          |          |          |
|----|----------|----------|----------|
| C  | -3.31073 | -0.07092 | -2.52835 |
| H  | -3.87020 | -0.32748 | -3.43261 |
| H  | -2.27322 | -0.39198 | -2.67742 |
| H  | -3.27768 | 1.02028  | -2.44135 |
| C  | -3.67217 | -0.68997 | 2.50668  |
| H  | -2.58266 | -0.71121 | 2.60858  |
| H  | -4.09266 | -1.42311 | 3.20117  |
| H  | -4.02114 | 0.29825  | 2.83174  |
| Bi | 0.00006  | -0.18861 | -0.36768 |
| Br | 0.00015  | 1.54695  | -2.64195 |
| Br | 0.00011  | -1.56113 | 2.07421  |
| C  | -6.72256 | -3.21441 | -0.58777 |
| H  | -6.32364 | -4.22832 | -0.72035 |
| H  | -7.39569 | -3.23998 | 0.27507  |
| H  | -7.31477 | -2.98013 | -1.47832 |
| C  | 6.72247  | -3.21440 | -0.58761 |
| H  | 7.39543  | -3.24012 | 0.27536  |
| H  | 6.32354  | -4.22829 | -0.72041 |
| H  | 7.31486  | -2.98002 | -1.47802 |

**Table S10.** Atomic coordinates of the singlet ground state of **LBiBr<sub>2</sub>** for SOC-corrected calculations using ORCA.

|   |                  |                   |                   |
|---|------------------|-------------------|-------------------|
| C | 4.29735665243139 | 3.79606574074262  | 0.46224345907562  |
| C | 5.94079896008075 | 1.86355808087569  | 3.72599419775269  |
| C | 2.68814628894838 | 3.57237779576208  | -1.37859691309074 |
| C | 1.58299506123917 | 1.48261415233135  | -1.59513490386568 |
| N | 5.38716440416923 | 2.64756987910515  | 2.68396727974378  |
| C | 3.72028092077158 | 4.34993730748172  | -0.66823345996793 |
| N | 2.37250409504963 | 2.42455017135415  | -0.89468100025173 |
| C | 6.96258385186798 | 4.47034022903835  | 3.09405101999259  |
| H | 6.60811129971615 | 5.44718117105638  | 3.43349481262564  |
| H | 7.81711495670008 | 4.64843299399008  | 2.43682001840798  |
| H | 7.28469574763937 | 3.88859856231178  | 3.95424527297643  |
| C | 2.08645559748251 | 0.89364180942996  | -2.76468082061993 |
| C | 5.16994494109832 | 6.25583241538329  | -0.42441609803713 |
| H | 5.51414844492531 | 7.22166895272875  | -0.77370891810443 |
| C | 5.30083840223171 | 4.44760490996237  | 1.15878503362161  |
| C | 3.98215820380638 | 2.51483612776909  | 5.16863478997475  |
| H | 3.63428190895390 | 2.36964253171470  | 6.19152568333352  |
| H | 3.18069778962432 | 2.20238349987271  | 4.49357346677820  |
| H | 4.12368569717589 | 3.58507423101311  | 4.99894772470427  |
| C | 5.74381672245928 | 5.68972959590676  | 0.70347056134846  |
| H | 6.53327093775444 | 6.22079397445032  | 1.22131410988945  |
| C | 1.32885026538662 | -0.10229982004952 | -3.37379951292517 |
| H | 1.71593612319034 | -0.57216241569184 | -4.27177531880272 |
| C | 5.87242266477675 | 3.78723762075417  | 2.34833150790685  |
| C | 7.14090814914208 | 1.17642544722597  | 3.50362193588532  |
| C | 5.76701049875927 | 0.92528653959899  | 5.92174354526075  |
| H | 5.23742732883625 | 0.84000393931797  | 6.86468356491290  |

|    |                   |                   |                   |
|----|-------------------|-------------------|-------------------|
| C  | 4.16343404691645  | 5.59578238348753  | -1.11278648264870 |
| H  | 3.73452311390270  | 6.05543260390761  | -1.99482613271177 |
| C  | 5.24273095086835  | 1.74848284599995  | 4.93225734715632  |
| C  | 6.94386444706861  | 0.22427392263991  | 5.71788460154162  |
| H  | 7.33530659076504  | -0.42060672880293 | 6.49653700968099  |
| C  | 7.91187542469065  | 1.32370935484405  | 2.22962874982095  |
| H  | 7.26199648512190  | 1.26293771086345  | 1.35516318138638  |
| H  | 8.66757787029846  | 0.54128048267121  | 2.15446067273960  |
| H  | 8.43164229882724  | 2.28575029313277  | 2.18772267198940  |
| C  | -0.37365977449806 | 0.10177354546426  | -1.70510318719173 |
| H  | -1.33297725631612 | -0.19602701469832 | -1.29559136402326 |
| C  | 7.62121313165022  | 0.35437181201509  | 4.51774276173033  |
| H  | 8.54608389688743  | -0.18852917869583 | 4.35393028340166  |
| C  | 0.35391547173205  | 1.08776222418675  | -1.05189859493882 |
| C  | 0.10890795264067  | -0.49788293694267 | -2.85663862318855 |
| H  | -0.46560709137155 | -1.27444921805409 | -3.34860114806389 |
| C  | 2.06840511184523  | 4.15051562255025  | -2.59892216877322 |
| H  | 1.30046114783838  | 3.49746784661749  | -3.00591731876345 |
| H  | 2.82612478522992  | 4.34099741627863  | -3.36235440580745 |
| H  | 1.62249295207658  | 5.11522782435271  | -2.34245508740298 |
| C  | 3.39142953011553  | 1.29380711214685  | -3.37973397736992 |
| H  | 3.80298396576636  | 0.46221966921238  | -3.95283706992319 |
| H  | 4.12656906859694  | 1.58548437919426  | -2.63004611581510 |
| H  | 3.26226253102190  | 2.13176629296858  | -4.07136921437610 |
| C  | -0.18089754667806 | 1.71762265490151  | 0.19244536362924  |
| H  | 0.38072662562600  | 1.40383326198999  | 1.07814961880967  |
| H  | -1.22039288784695 | 1.42805548789557  | 0.34845374570981  |
| H  | -0.11936900556655 | 2.80639744912524  | 0.16058965650403  |
| Bi | 3.43337329429359  | 1.94867208354011  | 1.28261135039577  |
| Br | 5.15052066001351  | 0.35562672584584  | -0.22926715022860 |
| Br | 1.67087629426569  | 3.89821862792523  | 2.49064998820544  |

**Table S11.** Atomic coordinates of the triplet state of **LBiBr<sub>2</sub>** for SOC-corrected calculations using ORCA.

|   |                  |                  |                   |
|---|------------------|------------------|-------------------|
| C | 4.32128440684313 | 3.89612443008312 | 0.44207054763243  |
| C | 6.00355304969605 | 1.89323143058271 | 3.61935643195738  |
| C | 2.73619836499248 | 3.62429431807628 | -1.40941544349758 |
| C | 1.74057966915373 | 1.47688716550088 | -1.66108633329900 |
| N | 5.50371618140873 | 2.67794151240543 | 2.55547425666876  |
| C | 3.66346172186846 | 4.45681933781085 | -0.64981166313104 |
| N | 2.59831481325948 | 2.39912590073196 | -1.01830378311604 |
| C | 6.86215882208192 | 4.61236025903386 | 3.19519670662064  |
| H | 6.39671328644393 | 5.46279141404686 | 3.70062151462889  |
| H | 7.66645746901905 | 5.00593464703654 | 2.56946239547834  |
| H | 7.28662674098024 | 3.94707044293282 | 3.94411274845493  |
| C | 2.24924600436451 | 0.69190533090983 | -2.69985643887079 |
| C | 4.82950357591293 | 6.51543933798169 | -0.17419848716074 |
| H | 5.02922659589840 | 7.55192161151862 | -0.41665958650627 |

|    |                   |                   |                   |
|----|-------------------|-------------------|-------------------|
| C  | 5.22750102698890  | 4.59673307653854  | 1.23416437384967  |
| C  | 4.29261275708528  | 2.96293392401942  | 5.12628877929052  |
| H  | 3.84473473571138  | 2.79223688081032  | 6.10548679724912  |
| H  | 3.50731113898491  | 2.89240966773757  | 4.37068228591777  |
| H  | 4.67297035256441  | 3.98883835521487  | 5.10559660978356  |
| C  | 5.47668958477337  | 5.92879526402969  | 0.90637413284502  |
| H  | 6.17307316894053  | 6.51561848489030  | 1.49402166130378  |
| C  | 1.41631774596153  | -0.26991910758802 | -3.26005986727143 |
| H  | 1.79872262143184  | -0.89022477175612 | -4.06367603393866 |
| C  | 5.85824985085302  | 3.90491007283443  | 2.35435475028459  |
| C  | 7.06028128117024  | 1.01277426690184  | 3.36989211205967  |
| C  | 5.83417701106819  | 1.12496192283040  | 5.87597999373276  |
| H  | 5.36027371070703  | 1.17115042872323  | 6.85077748074999  |
| C  | 3.93169224589080  | 5.79218892114239  | -0.94927876852511 |
| H  | 3.44178022361501  | 6.27370372317117  | -1.78766442552185 |
| C  | 5.38573583237970  | 1.97447860184546  | 4.87104570844995  |
| C  | 6.86798376083569  | 0.23144484393748  | 5.64707787212208  |
| H  | 7.20130429751629  | -0.42762754085961 | 6.44075166149100  |
| C  | 7.73909325597674  | 0.98776095746172  | 2.03714392331963  |
| H  | 7.03705862118842  | 0.75815780768908  | 1.23124807978995  |
| H  | 8.52664339222686  | 0.23410748537795  | 2.02422731030395  |
| H  | 8.18933072086375  | 1.95689195690181  | 1.80364337990955  |
| C  | -0.37081129338505 | 0.36493465358727  | -1.79092756691108 |
| H  | -1.39171302698166 | 0.24441585534042  | -1.44439613707513 |
| C  | 7.47939656269212  | 0.18469446121802  | 4.40449909480260  |
| H  | 8.29852124614934  | -0.50366373490028 | 4.22560557369192  |
| C  | 0.42817898891950  | 1.33676137595299  | -1.20008064038668 |
| C  | 0.11783769809375  | -0.43958249785382 | -2.80767819136201 |
| H  | -0.51713093022806 | -1.19753591049883 | -3.25237445692385 |
| C  | 2.00129016156197  | 4.19888374537786  | -2.56949897165228 |
| H  | 1.34573465221502  | 3.46076538756212  | -3.02665988469050 |
| H  | 2.70854807421797  | 4.55951544906260  | -3.32050449811977 |
| H  | 1.40344033925676  | 5.05537497509579  | -2.24818387610856 |
| C  | 3.63858299902751  | 0.90300787697848  | -3.21213082776335 |
| H  | 3.90077428427775  | 0.12961914580501  | -3.93428777561136 |
| H  | 4.37102945997635  | 0.88035598744922  | -2.40218914646061 |
| H  | 3.73460784997782  | 1.87408681480456  | -3.70767377573327 |
| C  | -0.10765925734228 | 2.22628000753213  | -0.12354404255725 |
| H  | 0.47566760246417  | 2.13895627079244  | 0.79677839958524  |
| H  | -1.14183544408447 | 1.96762272192161  | 0.10477292929115  |
| H  | -0.07851489197303 | 3.27761436625612  | -0.42391565118934 |
| Bi | 3.89194287028155  | 1.83107254761991  | 0.95109749301373  |
| Br | 4.70880999100187  | -0.79471720050405 | 0.09991509891058  |
| Br | 2.03272402522373  | 0.76426534089475  | 2.87663617019439  |

**Table S12.** Atomic coordinates of **LBi** for TD-DFT calculations using Gaussian 16 program package.

|   |          |          |          |
|---|----------|----------|----------|
| C | 0.00007  | 1.83840  | -0.00006 |
| C | -3.41827 | -0.41673 | -0.00000 |

|   |          |          |          |
|---|----------|----------|----------|
| C | 2.45390  | 1.76856  | -0.00003 |
| C | 3.41876  | -0.41689 | 0.00002  |
| N | -2.31491 | 0.47272  | -0.00007 |
| C | 1.22436  | 2.54820  | -0.00005 |
| N | 2.31502  | 0.47216  | -0.00005 |
| C | -3.79112 | 2.45165  | -0.00001 |
| H | -3.89885 | 3.09308  | -0.88237 |
| H | -3.89883 | 3.09303  | 0.88240  |
| H | -4.60491 | 1.72375  | -0.00003 |
| C | 3.92876  | -0.88640 | 1.22258  |
| C | 0.00043  | 4.64244  | -0.00003 |
| H | 0.00059  | 5.72838  | -0.00002 |
| C | -1.22405 | 2.54854  | -0.00006 |
| C | -3.38995 | -0.36939 | -2.52652 |
| H | -3.81483 | -0.92227 | -3.36948 |
| H | -2.29769 | -0.45790 | -2.56675 |
| H | -3.62468 | 0.69307  | -2.67078 |
| C | -1.20797 | 3.94805  | -0.00004 |
| H | -2.13983 | 4.50834  | -0.00003 |
| C | 4.95878  | -1.82703 | 1.19580  |
| H | 5.35329  | -2.19428 | 2.14187  |
| C | -2.45368 | 1.76919  | -0.00005 |
| C | -3.93172 | -0.88238 | 1.22258  |
| C | -4.96629 | -1.81814 | -1.19561 |
| H | -5.36824 | -2.17749 | -2.14160 |
| C | 1.20866  | 3.94768  | -0.00003 |
| H | 2.14066  | 4.50773  | -0.00002 |
| C | -3.93165 | -0.88262 | -1.22253 |
| C | -5.49595 | -2.30400 | 0.00013  |
| C | -3.39007 | -0.36891 | 2.52650  |
| H | -2.29780 | -0.45731 | 2.56676  |
| H | -3.81491 | -0.92170 | 3.36954  |
| H | -3.62490 | 0.69356  | 2.67060  |
| C | 4.95880  | -1.82716 | -1.19557 |
| H | 5.35334  | -2.19452 | -2.14160 |
| C | -4.96635 | -1.81791 | 1.19579  |
| H | -5.36833 | -2.17708 | 2.14182  |
| C | 3.92880  | -0.88655 | -1.22249 |
| C | 5.49071  | -2.31065 | 0.00015  |
| C | 3.79138  | 2.45096  | 0.00004  |
| H | 4.60507  | 1.72296  | -0.00004 |
| H | 3.89914  | 3.09227  | 0.88249  |
| H | 3.89913  | 3.09247  | -0.88227 |
| C | 3.38234  | -0.37843 | 2.52663  |
| H | 3.80442  | -0.93448 | 3.36892  |
| H | 2.28991  | -0.46672 | 2.56294  |
| H | 3.61685  | 0.68341  | 2.67561  |
| C | 3.38240  | -0.37872 | -2.52661 |

|    |          |          |          |
|----|----------|----------|----------|
| H  | 2.28998  | -0.46704 | -2.56294 |
| H  | 3.80453  | -0.93483 | -3.36883 |
| H  | 3.61688  | 0.68312  | -2.67567 |
| Bi | -0.00056 | -0.30167 | -0.00007 |
| C  | -6.58523 | -3.34114 | 0.00020  |
| H  | -7.22215 | -3.25313 | 0.88658  |
| H  | -7.22226 | -3.25314 | -0.88611 |
| H  | -6.16651 | -4.35594 | 0.00017  |
| C  | 6.61910  | -3.30519 | 0.00018  |
| H  | 6.58555  | -3.94860 | -0.88516 |
| H  | 7.59411  | -2.80042 | -0.00142 |
| H  | 6.58732  | -3.94653 | 0.88708  |

**Table S13.** Atomic coordinates of the triplet state of **LBi** for SOC-corrected calculations using ORCA.

|    |                   |                   |                   |
|----|-------------------|-------------------|-------------------|
| Bi | 18.27567475681291 | 2.36946785281932  | 0.98367618879633  |
| C  | 16.05919722147381 | 2.65947489081853  | -1.58793201792648 |
| N  | 19.91795314554489 | 1.48796979080513  | 2.54690819655962  |
| N  | 16.96828030117461 | 1.76742026164213  | -0.98513031518235 |
| C  | 19.65333115546782 | -0.39795023459216 | 1.19893253508516  |
| C  | 18.72864263280894 | 0.34420841302872  | 0.44099671009409  |
| C  | 15.62633943547339 | 4.48357597026000  | -3.07776830141595 |
| H  | 15.97590489022268 | 5.18803390045968  | -3.82546899047816 |
| C  | 20.27748162710051 | 0.26268120962184  | 2.33096015631330  |
| C  | 20.44519604125951 | 2.26097997705809  | 3.60062474818253  |
| C  | 19.93475178137557 | -1.71542800141948 | 0.84237550299562  |
| H  | 20.64371741122311 | -2.29883640940142 | 1.41934891122860  |
| C  | 19.78066108724817 | 2.28504214191579  | 4.83131951316456  |
| C  | 14.72826986160651 | 2.67020821136302  | -1.15686526271123 |
| C  | 18.10003376248480 | -0.24842583245122 | -0.66973640948658 |
| C  | 16.52396445154799 | 3.56205175642160  | -2.55036972273798 |
| C  | 18.40014197295179 | -1.56682023833677 | -1.00687794370788 |
| H  | 17.92361657339657 | -2.03532423895694 | -1.86095540163787 |
| C  | 21.58137267524110 | 3.04316466069175  | 3.36700312966711  |
| C  | 14.30469694096164 | 4.51145605387249  | -2.66250255527590 |
| H  | 13.61829589241145 | 5.23869280906671  | -3.08148195957560 |
| C  | 19.31031395801277 | -2.29655729327286 | -0.25329887237376 |
| H  | 19.53551769756896 | -3.32150924497454 | -0.52251977722003 |
| C  | 13.86298751622203 | 3.60747744302495  | -1.70975039067428 |
| H  | 12.82846492827240 | 3.62350515813977  | -1.38260821496909 |
| C  | 17.15244041124256 | 0.56034388326098  | -1.41574295245306 |
| C  | 16.44770378985418 | 0.00075357160935  | -2.60652454583875 |
| H  | 15.78781404560067 | 0.73924356376467  | -3.05819076057863 |
| H  | 15.85468654146853 | -0.87303762014256 | -2.32470278540488 |
| H  | 17.17155942832931 | -0.32761171338606 | -3.35641217841675 |
| C  | 20.27758317897255 | 3.11181761293506  | 5.83277759181441  |
| H  | 19.76989877181780 | 3.13707425567063  | 6.79150794299289  |
| C  | 21.40104307905744 | 3.89482473644240  | 5.62050759329489  |
| H  | 21.77322739053255 | 4.53714300747195  | 6.41072473169176  |



|   |                   |                   |                   |
|---|-------------------|-------------------|-------------------|
| C | 21.27280649450454 | -0.45824107572408 | 3.17749027780788  |
| H | 21.66828273233834 | 0.18808814929788  | 3.95892849145425  |
| H | 22.10361109816570 | -0.82040020369813 | 2.56716321923936  |
| H | 20.81127812761627 | -1.33108428354793 | 3.64693073069009  |
| C | 14.25016984150377 | 1.68446401203279  | -0.13823197503781 |
| H | 14.24973619205525 | 0.66602400301371  | -0.53901912548382 |
| H | 13.23440194636775 | 1.92122061264845  | 0.17959734241269  |
| H | 14.90177326588439 | 1.67630407639407  | 0.74006159573285  |
| C | 22.04565852029687 | 3.85647053214165  | 4.39443455703383  |
| H | 22.92618693797941 | 4.46702966478960  | 4.22319589641149  |
| C | 22.28327431384090 | 2.98881963220544  | 2.04699683754706  |
| H | 22.73582717434304 | 2.00704199555063  | 1.87726914629436  |
| H | 23.07394366795300 | 3.73815733694491  | 1.99987126564920  |
| H | 21.58626803906200 | 3.15958809566985  | 1.22164253495588  |
| C | 17.94618987311018 | 3.51614273055102  | -3.01185767850279 |
| H | 18.63827477621048 | 3.54535276011607  | -2.16568442669993 |
| H | 18.16397096594401 | 4.35468504819694  | -3.67388036665525 |
| H | 18.15598739584699 | 2.58999021043951  | -3.55589046243500 |
| C | 18.57597792335613 | 1.42902702742589  | 5.06384303434013  |
| H | 18.83582654336041 | 0.36595216550588  | 5.05582049653395  |
| H | 17.82936876507674 | 1.57481347756005  | 4.27815810976590  |
| H | 18.12128305044292 | 1.65812472725507  | 6.02796140512998  |

**Table S14.** Atomic coordinates of the triplet state of **LBI** for SOC-corrected calculations using ORCA.

|    |                   |                   |                   |
|----|-------------------|-------------------|-------------------|
| Bi | 18.29346596547557 | 2.32586893948558  | 0.95717138499609  |
| C  | 16.08406560091066 | 2.67255356865839  | -1.57854400136832 |
| N  | 19.91055478899443 | 1.51098589258910  | 2.52567739473235  |
| N  | 17.00387511114963 | 1.79242342924900  | -0.98737231035334 |
| C  | 19.64062857860193 | -0.44180410485838 | 1.21814201363315  |
| C  | 18.72854234622992 | 0.26114228648468  | 0.43469183137780  |
| C  | 15.63445118891509 | 4.54435752031017  | -3.01400391464216 |
| H  | 15.98554784718499 | 5.29159707339331  | -3.71838656682865 |
| C  | 20.24837169717733 | 0.25368367091939  | 2.31778965421045  |
| C  | 20.44755227001444 | 2.28324961777869  | 3.56857547723508  |
| C  | 19.91246780710833 | -1.80089576142460 | 0.87508477151889  |
| H  | 20.60956415022934 | -2.39234296277797 | 1.45516725303049  |
| C  | 19.79832625365125 | 2.31815918129668  | 4.80896406455286  |
| C  | 14.73382506906511 | 2.62038491126882  | -1.20720903561044 |
| C  | 18.07724276928843 | -0.29231584523125 | -0.66684627023285 |
| C  | 16.54502993521894 | 3.63802422773167  | -2.48262477785727 |
| C  | 18.36293235574836 | -1.65170176602956 | -0.99822649850410 |
| H  | 17.88337642655664 | -2.13021249322492 | -1.84290545338611 |
| C  | 21.58796838407795 | 3.06024147936752  | 3.32927213619754  |
| C  | 14.29541863534678 | 4.50056784250684  | -2.65960883648610 |
| H  | 13.59694570423674 | 5.21444626248089  | -3.08173235798306 |
| C  | 19.26573384406067 | -2.36072314411730 | -0.21800436819169 |
| H  | 19.47577600802884 | -3.39480954646556 | -0.47426264171541 |
| C  | 13.85313736947344 | 3.54290283411174  | -1.76076860941953 |

|   |                   |                   |                   |
|---|-------------------|-------------------|-------------------|
| H | 12.80630307504148 | 3.50646346531623  | -1.47670477979252 |
| C | 17.16506291622002 | 0.54491075870817  | -1.39095137302705 |
| C | 16.44677133657942 | -0.00797106465040 | -2.57417580272710 |
| H | 15.81756241933457 | 0.74107975684277  | -3.05190690787967 |
| H | 15.82174894961200 | -0.85769485553672 | -2.28161835138899 |
| H | 17.16498164494184 | -0.38584375194084 | -3.30817817867545 |
| C | 20.31304603146572 | 3.13687845387361  | 5.80808732712539  |
| H | 19.81606512600630 | 3.16539455168509  | 6.77247287273056  |
| C | 21.44279114164098 | 3.90856341213538  | 5.58609890905307  |
| H | 21.83105111855039 | 4.54384348253976  | 6.37434731643993  |
| C | 21.23165427183058 | -0.46065408129524 | 3.18004504133320  |
| H | 21.64484565094275 | 0.19058874379383  | 3.94830533858538  |
| H | 22.05130209262300 | -0.85688297935579 | 2.57329181618142  |
| H | 20.75681519383951 | -1.31941167680888 | 3.66541506654980  |
| C | 14.25533423328446 | 1.59088913589504  | -0.23294310969897 |
| H | 14.34472946048262 | 0.57915599929469  | -0.63907666175486 |
| H | 13.20913532043416 | 1.76029662588818  | 0.02368996058655  |
| H | 14.84732388509501 | 1.61092400977891  | 0.68663017665118  |
| C | 22.07255662853280 | 3.86751052063626  | 4.35221327845208  |
| H | 22.95709262044125 | 4.47020168196026  | 4.17301405375200  |
| C | 22.27241857769433 | 3.00570245357738  | 1.99999228587948  |
| H | 22.66925682529440 | 2.00684550115437  | 1.79628438584450  |
| H | 23.09968203030668 | 3.71517160584431  | 1.96142035265034  |
| H | 21.57948782775675 | 3.23637787031540  | 1.18557317647112  |
| C | 17.98808712683053 | 3.67609700899401  | -2.87612062435349 |
| H | 18.63512427249027 | 3.84094641641019  | -2.00910834217672 |
| H | 18.17097476251133 | 4.47543074753075  | -3.59510332769660 |
| H | 18.30373624059185 | 2.72970013056355  | -3.32363551716938 |
| C | 18.58065986854126 | 1.48246814336043  | 5.04893575429210  |
| H | 18.80225578365595 | 0.41554633934431  | 4.95483939629426  |
| H | 17.79662174326548 | 1.70351446328204  | 4.31853073299402  |
| H | 18.18158371741578 | 1.66085501735990  | 6.04792039556864  |

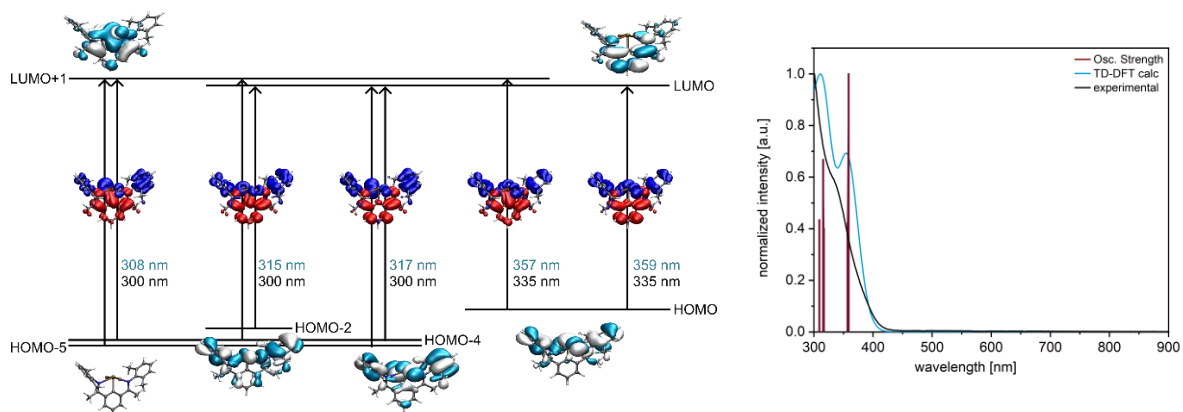

**Figure S32. Left:** Relevant pbe1pbe/6-31G(d)PCM ( $\text{CH}_2\text{Cl}_2$ )-calculated electronic transitions of  $\text{LBiBr}_2$  with the calculated wavelengths in light blue. Contour plots of respective acceptor and donor molecular orbitals are shown in light blue and white colours and the corresponding electron density difference maps (EDDMs) in red and blue with electron density gain in red and electron density loss in blue. The values in black represent the wavelengths of the experimentally detected electronic transitions; **Right:** Comparison of the experimental and TD-DFT computed absorption spectra of  $\text{LBiBr}_2$ .

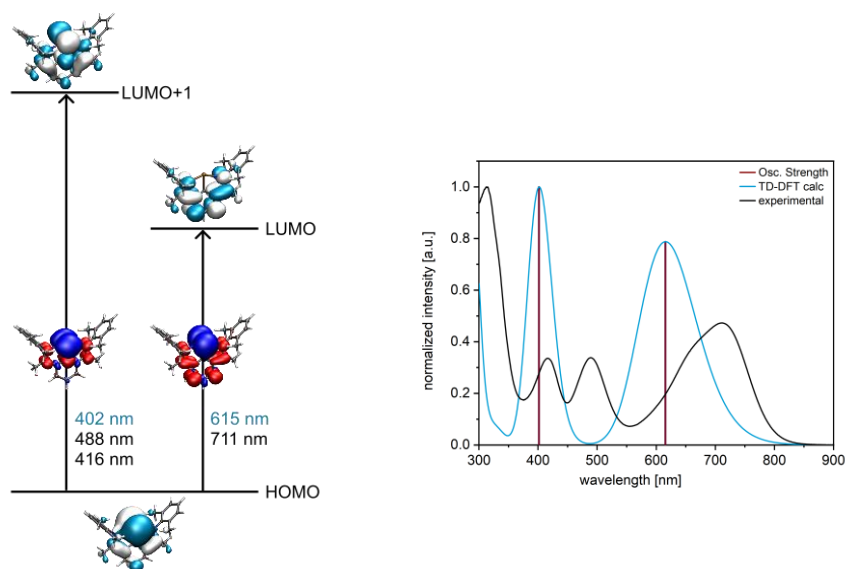

**Figure S33. Left:** Relevant pbe1pbe/6-31G(d)PCM (benzene)-calculated electronic transitions of  $\text{LBi}$  with the respective wavelengths in light blue. The respective acceptor and donor molecular orbitals are shown in light blue and white colours and the corresponding electron density difference maps (EDDMs) in red and blue with electron density gain in red and electron density loss in blue. The values in black represent the wavelengths of the experimentally detected electronic transitions; **Right:** Comparison of the experimental and TD-DFT computed absorption spectra of  $\text{LBi}$ .

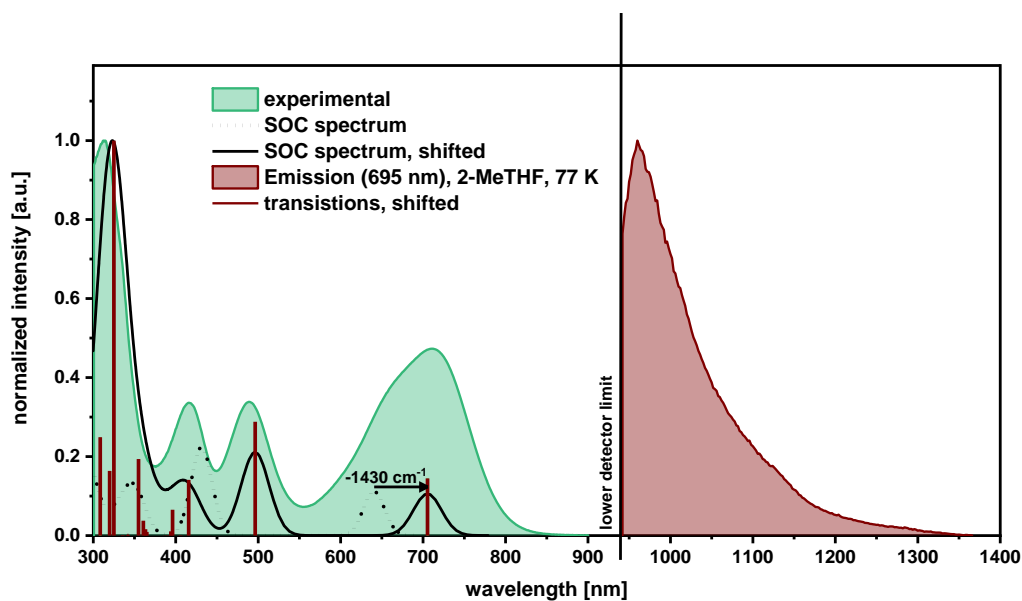

**Figure S34.** Comparison of experimental and calculated spectra. Calculations were done using the PBE0-function (PBE0) with the SARC-ZORA-TZVP basis set for Bi and the ZORA-def2-TZVP basis and the SARC/J decontracted def2/J auxiliary basis for all other elements.

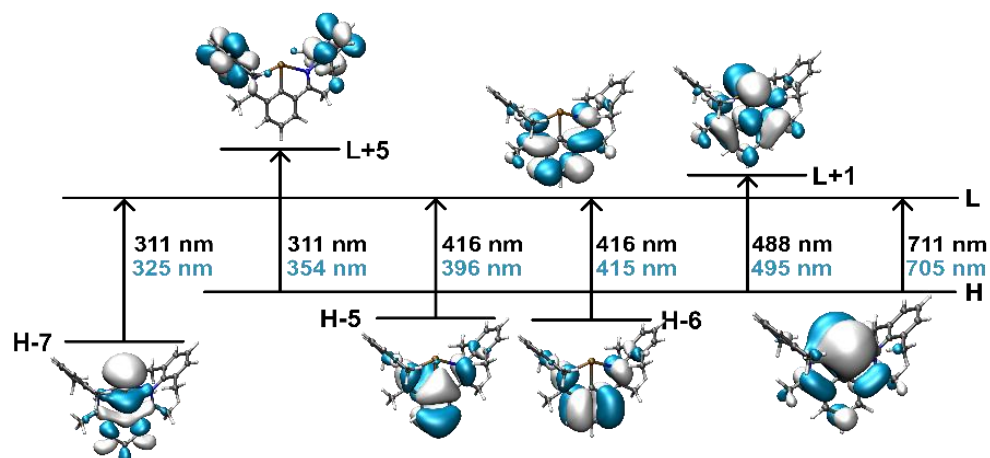

**Figure S35.** MO Scheme of all relevant calculated electronic transitions with osc. strength greater 5% (normalized) of LBi using ORCA with the respective wavelengths in light blue. The values in black represent the wavelengths of the experimentally detected electronic transitions. Contour diagrams of the respective acceptor and donor molecular orbitals are shown in light blue and white colours. Calculations were done using the PBE0-function (PBE0) with the SARC-ZORA-TZVP basis set for Bi and the ZORA-def2-TZVP basis and the SARC/J decontracted def2/J auxiliary basis for all other elements.

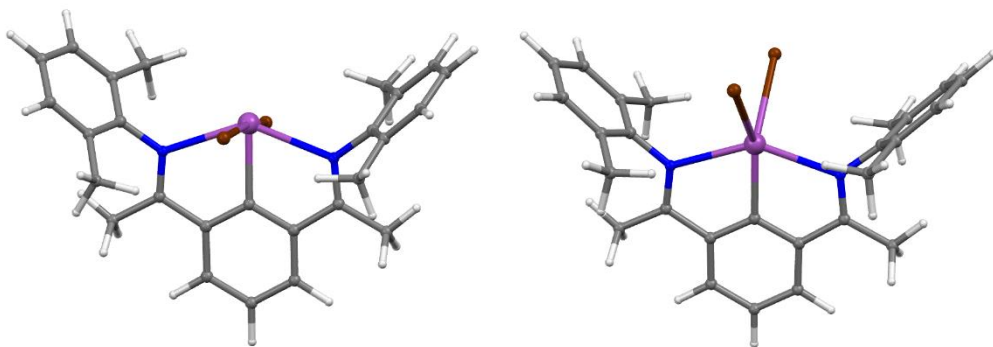

**Figure S36.** Depictions of the optimized calculated structure of **LBiBr<sub>2</sub>** for the singlet (left) and triplet excited states  $S_1$  and  $T_1$  (right). Calculations were done using the PBE0-function (PBE0) with the SARC-ZORA-TZVP basis set for Bi and the ZORA-def2-TZVP basis and the SARC/J decontracted def2/J auxiliary basis for all other elements using ORCA.

**Table S15.** Calculated eigenvectors of the SOC matrix. Note that the correction factor of 1430 cm<sup>-1</sup> has not been subtracted from these values.

|           | E(cm-1)  | Weight | Real     | Imag     | :Root | Spin | M <sub>s</sub> |
|-----------|----------|--------|----------|----------|-------|------|----------------|
| STATE 0:  | 0.00     |        |          |          |       |      |                |
|           | 0.93871  |        | 0.96887  | -0.00000 | : 0   | 0    | 0              |
|           | 0.02518  |        | 0.15474  | 0.03514  | : 3   | 1    | -1             |
|           | 0.02518  |        | 0.15474  | -0.03514 | : 3   | 1    | 1              |
| STATE 1:  | 13913.17 |        |          |          |       |      |                |
|           | 0.01857  |        | -0.00000 | -0.13627 | : 16  | 0    | 0              |
|           | 0.56996  |        | 0.75496  | -0.00000 | : 1   | 1    | 0              |
|           | 0.20415  |        | 0.44879  | -0.05236 | : 1   | 1    | -1             |
|           | 0.20415  |        | -0.44879 | -0.05236 | : 1   | 1    | 1              |
| STATE 2:  | 13920.97 |        |          |          |       |      |                |
|           | 0.32801  |        | 0.57272  | 0.00000  | : 1   | 1    | 0              |
|           | 0.32499  |        | -0.51117 | -0.25239 | : 1   | 1    | -1             |
|           | 0.32499  |        | 0.51117  | -0.25239 | : 1   | 1    | 1              |
| STATE 3:  | 13921.51 |        |          |          |       |      |                |
|           | 0.08020  |        | 0.06861  | -0.27476 | : 1   | 1    | 0              |
|           | 0.44900  |        | 0.59141  | 0.31501  | : 1   | 1    | -1             |
|           | 0.44900  |        | 0.67008  | -0.00000 | : 1   | 1    | 1              |
| STATE 4:  | 16568.42 |        |          |          |       |      |                |
|           | 0.96969  |        | 0.98473  | 0.00000  | : 1   | 0    | 0              |
|           | 0.01532  |        | 0.00000  | -0.12378 | : 18  | 1    | 0              |
| STATE 5:  | 17387.43 |        |          |          |       |      |                |
|           | 0.53170  |        | 0.72918  | 0.00000  | : 2   | 1    | 0              |
|           | 0.02874  |        | 0.16952  | 0.00000  | : 3   | 1    | 0              |
|           | 0.18998  |        | 0.43411  | -0.03906 | : 2   | 1    | -1             |
|           | 0.02621  |        | -0.14811 | -0.06535 | : 3   | 1    | -1             |
|           | 0.18998  |        | -0.43411 | -0.03906 | : 2   | 1    | 1              |
|           | 0.02621  |        | 0.14811  | -0.06535 | : 3   | 1    | 1              |
| STATE 6:  | 17402.12 |        |          |          |       |      |                |
|           | 0.32160  |        | 0.56710  | -0.00000 | : 2   | 1    | 0              |
|           | 0.04918  |        | -0.22177 | -0.00000 | : 3   | 1    | 0              |
|           | 0.29331  |        | -0.49582 | -0.21789 | : 2   | 1    | -1             |
|           | 0.01760  |        | -0.13211 | 0.01207  | : 3   | 1    | -1             |
|           | 0.29331  |        | 0.49582  | -0.21789 | : 2   | 1    | 1              |
|           | 0.01760  |        | 0.13211  | 0.01207  | : 3   | 1    | 1              |
| STATE 7:  | 17675.40 |        |          |          |       |      |                |
|           | 0.03449  |        | 0.18119  | -0.04077 | : 3   | 0    | 0              |
|           | 0.06013  |        | -0.05383 | -0.23924 | : 2   | 1    | 0              |
|           | 0.44916  |        | 0.67020  | -0.00000 | : 2   | 1    | -1             |
|           | 0.44916  |        | 0.60561  | -0.28705 | : 2   | 1    | 1              |
| STATE 8:  | 23264.19 |        |          |          |       |      |                |
|           | 0.02517  |        | 0.15867  | -0.00000 | : 0   | 0    | 0              |
|           | 0.65290  |        | 0.80802  | -0.00000 | : 2   | 0    | 0              |
|           | 0.01721  |        | 0.00000  | 0.13118  | : 3   | 1    | 0              |
|           | 0.12973  |        | -0.35149 | -0.07866 | : 3   | 1    | -1             |
|           | 0.12973  |        | -0.35149 | 0.07866  | : 3   | 1    | 1              |
| STATE 9:  | 25104.53 |        |          |          |       |      |                |
|           | 0.03039  |        | 0.17432  | -0.00000 | : 2   | 1    | 0              |
|           | 0.51014  |        | 0.71424  | -0.00000 | : 3   | 1    | 0              |
|           | 0.02897  |        | -0.15609 | -0.06789 | : 2   | 1    | -1             |
|           | 0.17532  |        | 0.41676  | -0.04032 | : 3   | 1    | -1             |
|           | 0.02897  |        | 0.15609  | -0.06789 | : 2   | 1    | 1              |
|           | 0.17532  |        | -0.41676 | -0.04032 | : 3   | 1    | 1              |
| STATE 10: | 25315.54 |        |          |          |       |      |                |
|           | 0.04949  |        | -0.22247 | 0.00000  | : 2   | 1    | 0              |
|           | 0.30908  |        | 0.55595  | 0.00000  | : 3   | 1    | 0              |
|           | 0.01698  |        | -0.12969 | 0.01267  | : 2   | 1    | -1             |
|           | 0.29458  |        | -0.49748 | -0.21700 | : 3   | 1    | -1             |
|           | 0.01698  |        | 0.12969  | 0.01267  | : 2   | 1    | 1              |
|           | 0.29458  |        | 0.49748  | -0.21700 | : 3   | 1    | 1              |
| STATE 11: | 26347.46 |        |          |          |       |      |                |
|           | 0.06990  |        | 0.06241  | -0.25691 | : 4   | 1    | 0              |
|           | 0.46261  |        | 0.60435  | 0.31205  | : 4   | 1    | -1             |
|           | 0.46261  |        | 0.68015  | 0.00000  | : 4   | 1    | 1              |
| STATE 12: | 26354.38 |        |          |          |       |      |                |
|           | 0.49878  |        | -0.63409 | -0.31099 | : 4   | 1    | -1             |
|           | 0.49878  |        | 0.70624  | -0.00000 | : 4   | 1    | 1              |
| STATE 13: | 26354.61 |        |          |          |       |      |                |
|           | 0.92752  |        | 0.96308  | 0.00000  | : 4   | 1    | 0              |

|           |          |          |               |   |    |
|-----------|----------|----------|---------------|---|----|
|           | 0.03577  | 0.01775  | -0.18830 : 4  | 1 | -1 |
|           | 0.03577  | -0.01775 | -0.18830 : 4  | 1 | 1  |
| STATE 14: | 27220.87 |          |               |   |    |
|           | 0.03217  | -0.17937 | 0.00000 : 0   | 0 | 0  |
|           | 0.31466  | 0.56094  | 0.00000 : 2   | 0 | 0  |
|           | 0.04060  | 0.00000  | -0.20150 : 3  | 1 | 0  |
|           | 0.29848  | 0.53283  | 0.12072 : 3   | 1 | -1 |
|           | 0.29848  | 0.53283  | -0.12072 : 3  | 1 | 1  |
| STATE 15: | 27982.88 |          |               |   |    |
|           | 0.78717  | 0.88722  | -0.00000 : 3  | 0 | 0  |
|           | 0.03183  | 0.00000  | 0.17840 : 7   | 1 | 0  |
|           | 0.01073  | -0.00000 | -0.10357 : 11 | 1 | 0  |
|           | 0.01694  | -0.12698 | -0.02855 : 2  | 1 | -1 |
|           | 0.03079  | 0.07897  | -0.15669 : 7  | 1 | -1 |
|           | 0.01101  | -0.04228 | 0.09603 : 11  | 1 | -1 |
|           | 0.01694  | -0.12698 | 0.02855 : 2   | 1 | 1  |
|           | 0.03079  | 0.07897  | 0.15669 : 7   | 1 | 1  |
|           | 0.01101  | -0.04228 | -0.09603 : 11 | 1 | 1  |
| STATE 16: | 29408.27 |          |               |   |    |
|           | 0.01007  | -0.07562 | 0.06598 : 5   | 1 | 0  |
|           | 0.02799  | 0.12607  | -0.11000 : 7  | 1 | 0  |
|           | 0.46108  | 0.67903  | -0.00000 : 5  | 1 | -1 |
|           | 0.46108  | -0.09200 | 0.67277 : 5   | 1 | 1  |
| STATE 17: | 29414.03 |          |               |   |    |
|           | 0.78621  | 0.88668  | -0.00000 : 5  | 1 | 0  |
|           | 0.08291  | 0.23573  | -0.16535 : 5  | 1 | -1 |
|           | 0.08291  | -0.23573 | -0.16535 : 5  | 1 | 1  |
| STATE 18: | 29432.60 |          |               |   |    |
|           | 0.16082  | 0.25379  | -0.31051 : 5  | 1 | 0  |
|           | 0.40509  | 0.12668  | 0.62373 : 5   | 1 | -1 |
|           | 0.40509  | 0.63646  | 0.00000 : 5   | 1 | 1  |
| STATE 19: | 29667.66 |          |               |   |    |
|           | 0.50319  | 0.70936  | -0.00000 : 6  | 1 | 0  |
|           | 0.04930  | -0.22203 | -0.00000 : 7  | 1 | 0  |
|           | 0.15372  | -0.37015 | 0.12927 : 6   | 1 | -1 |
|           | 0.03142  | -0.17620 | 0.01921 : 7   | 1 | -1 |
|           | 0.02388  | -0.15375 | -0.01547 : 8  | 1 | -1 |
|           | 0.15372  | 0.37015  | 0.12927 : 6   | 1 | 1  |
|           | 0.03142  | 0.17620  | 0.01921 : 7   | 1 | 1  |
|           | 0.02388  | 0.15375  | -0.01547 : 8  | 1 | 1  |
| STATE 20: | 29679.13 |          |               |   |    |
|           | 0.33606  | 0.57970  | 0.00000 : 6   | 1 | 0  |
|           | 0.03528  | 0.18784  | 0.00000 : 7   | 1 | 0  |
|           | 0.02212  | 0.14873  | 0.00000 : 8   | 1 | 0  |
|           | 0.27651  | 0.51903  | -0.08443 : 6  | 1 | -1 |
|           | 0.27651  | -0.51903 | -0.08443 : 6  | 1 | 1  |
| STATE 21: | 29687.15 |          |               |   |    |
|           | 0.47517  | 0.62336  | -0.29425 : 6  | 1 | -1 |
|           | 0.47517  | 0.68932  | -0.00000 : 6  | 1 | 1  |
| STATE 22: | 29777.81 |          |               |   |    |
|           | 0.13576  | -0.36845 | 0.00000 : 6   | 1 | 0  |
|           | 0.06764  | -0.26007 | -0.00000 : 7  | 1 | 0  |
|           | 0.21523  | 0.46393  | -0.00000 : 8  | 1 | 0  |
|           | 0.04098  | -0.20244 | 0.00000 : 9   | 1 | 0  |
|           | 0.18749  | -0.43073 | -0.04420 : 7  | 1 | -1 |
|           | 0.04987  | -0.13612 | -0.17705 : 8  | 1 | -1 |
|           | 0.18749  | 0.43073  | -0.04420 : 7  | 1 | 1  |
|           | 0.04987  | 0.13612  | -0.17705 : 8  | 1 | 1  |
| STATE 23: | 29787.25 |          |               |   |    |
|           | 0.03224  | 0.00000  | 0.17957 : 3   | 0 | 0  |
|           | 0.35641  | 0.59700  | 0.00000 : 7   | 1 | 0  |
|           | 0.04380  | 0.20928  | -0.00000 : 8  | 1 | 0  |
|           | 0.05667  | -0.23348 | 0.04637 : 6   | 1 | -1 |
|           | 0.03904  | -0.17850 | -0.08473 : 7  | 1 | -1 |
|           | 0.13676  | 0.36823  | -0.03414 : 8  | 1 | -1 |
|           | 0.02758  | -0.09033 | -0.13937 : 9  | 1 | -1 |
|           | 0.05667  | 0.23348  | 0.04637 : 6   | 1 | 1  |
|           | 0.03904  | 0.17850  | -0.08473 : 7  | 1 | 1  |
|           | 0.13676  | -0.36823 | -0.03414 : 8  | 1 | 1  |
|           | 0.02758  | 0.09033  | -0.13937 : 9  | 1 | 1  |
| STATE 24: | 29837.08 |          |               |   |    |
|           | 0.29153  | 0.53993  | 0.00000 : 4   | 0 | 0  |
|           | 0.02773  | 0.00000  | 0.16651 : 8   | 1 | 0  |

|           |          |               |   |    |
|-----------|----------|---------------|---|----|
| 0.01436   | 0.11982  | 0.00244 : 6   | 1 | -1 |
| 0.10733   | -0.31103 | -0.10290 : 7  | 1 | -1 |
| 0.17475   | -0.41278 | -0.06599 : 8  | 1 | -1 |
| 0.02300   | 0.10575  | 0.10871 : 9   | 1 | -1 |
| 0.01436   | 0.11982  | -0.00244 : 6  | 1 | 1  |
| 0.10733   | -0.31103 | 0.10290 : 7   | 1 | 1  |
| 0.17475   | -0.41278 | 0.06599 : 8   | 1 | 1  |
| 0.02300   | 0.10575  | -0.10871 : 9  | 1 | 1  |
| STATE 25: | 29908.82 |               |   |    |
| 0.07806   | 0.27266  | 0.06096 : 4   | 0 | 0  |
| 0.02870   | 0.03696  | -0.16533 : 7  | 1 | 0  |
| 0.06842   | -0.05707 | 0.25527 : 8   | 1 | 0  |
| 0.01822   | -0.02945 | 0.13174 : 9   | 1 | 0  |
| 0.30176   | 0.49703  | 0.23393 : 7   | 1 | -1 |
| 0.05281   | -0.20767 | -0.09838 : 8  | 1 | -1 |
| 0.03192   | 0.15816  | -0.08311 : 9  | 1 | -1 |
| 0.30176   | 0.54933  | -0.00000 : 7  | 1 | 1  |
| 0.05281   | -0.22980 | 0.00057 : 8   | 1 | 1  |
| 0.03192   | 0.10771  | 0.14255 : 9   | 1 | 1  |
| STATE 26: | 30077.36 |               |   |    |
| 0.02740   | -0.16554 | 0.00000 : 7   | 1 | 0  |
| 0.03609   | 0.18998  | 0.00000 : 8   | 1 | 0  |
| 0.47126   | 0.68649  | 0.00000 : 9   | 1 | 0  |
| 0.07027   | 0.25993  | -0.05200 : 8  | 1 | -1 |
| 0.13469   | 0.36618  | 0.02451 : 9   | 1 | -1 |
| 0.07027   | -0.25993 | -0.05200 : 8  | 1 | 1  |
| 0.13469   | -0.36618 | 0.02451 : 9   | 1 | 1  |
| STATE 27: | 30089.32 |               |   |    |
| 0.01309   | 0.11443  | -0.00000 : 5  | 1 | 0  |
| 0.09077   | 0.30129  | -0.00000 : 8  | 1 | 0  |
| 0.23437   | 0.48412  | 0.00000 : 9   | 1 | 0  |
| 0.01120   | -0.10582 | 0.00000 : 12  | 1 | 0  |
| 0.05920   | 0.07013  | 0.23298 : 7   | 1 | -1 |
| 0.02921   | -0.12076 | -0.12092 : 8  | 1 | -1 |
| 0.22230   | -0.45107 | -0.13724 : 9  | 1 | -1 |
| 0.05920   | -0.07013 | 0.23298 : 7   | 1 | 1  |
| 0.02921   | 0.12076  | -0.12092 : 8  | 1 | 1  |
| 0.22230   | 0.45107  | -0.13724 : 9  | 1 | 1  |
| STATE 28: | 30119.60 |               |   |    |
| 0.01432   | -0.11682 | -0.02591 : 9  | 0 | 0  |
| 0.13989   | 0.08100  | -0.36514 : 8  | 1 | 0  |
| 0.03727   | 0.18359  | -0.05968 : 8  | 1 | -1 |
| 0.37063   | 0.55169  | 0.25742 : 9   | 1 | -1 |
| 0.03727   | 0.14113  | 0.13171 : 8   | 1 | 1  |
| 0.37063   | 0.60879  | -0.00000 : 9  | 1 | 1  |
| STATE 29: | 30238.10 |               |   |    |
| 0.27033   | 0.51993  | 0.00000 : 7   | 1 | 0  |
| 0.07159   | 0.26757  | -0.00000 : 8  | 1 | 0  |
| 0.02462   | 0.15690  | 0.00000 : 11  | 1 | 0  |
| 0.03667   | 0.18128  | -0.06168 : 7  | 1 | -1 |
| 0.18536   | -0.39792 | -0.16440 : 8  | 1 | -1 |
| 0.07717   | 0.27101  | 0.06103 : 9   | 1 | -1 |
| 0.03667   | -0.18128 | -0.06168 : 7  | 1 | 1  |
| 0.18536   | 0.39792  | -0.16440 : 8  | 1 | 1  |
| 0.07717   | -0.27101 | 0.06103 : 9   | 1 | 1  |
| STATE 30: | 30261.92 |               |   |    |
| 0.03136   | 0.00000  | -0.17708 : 3  | 0 | 0  |
| 0.06029   | -0.24555 | -0.00000 : 7  | 1 | 0  |
| 0.20939   | 0.45759  | -0.00000 : 8  | 1 | 0  |
| 0.17005   | -0.41238 | -0.00000 : 9  | 1 | 0  |
| 0.01191   | -0.10911 | -0.00000 : 11 | 1 | 0  |
| 0.14267   | 0.35812  | 0.12008 : 7   | 1 | -1 |
| 0.06098   | 0.19831  | -0.14713 : 8  | 1 | -1 |
| 0.03105   | 0.08757  | -0.15290 : 9  | 1 | -1 |
| 0.01753   | 0.12491  | 0.04393 : 11  | 1 | -1 |
| 0.14267   | -0.35812 | 0.12008 : 7   | 1 | 1  |
| 0.06098   | -0.19831 | -0.14713 : 8  | 1 | 1  |
| 0.03105   | -0.08757 | -0.15290 : 9  | 1 | 1  |
| 0.01753   | -0.12491 | 0.04393 : 11  | 1 | 1  |
| STATE 31: | 30317.69 |               |   |    |
| 0.58990   | 0.76805  | 0.00000 : 4   | 0 | 0  |
| 0.01688   | 0.12993  | 0.00000 : 6   | 0 | 0  |
| 0.03378   | -0.00000 | -0.18378 : 8  | 1 | 0  |



|           |          |          |               |   |    |
|-----------|----------|----------|---------------|---|----|
|           | 0.13890  | 0.36351  | 0.08224 : 8   | 1 | -1 |
|           | 0.03575  | -0.17291 | -0.07650 : 9  | 1 | -1 |
|           | 0.13890  | 0.36351  | -0.08224 : 8  | 1 | 1  |
|           | 0.03575  | -0.17291 | 0.07650 : 9   | 1 | 1  |
| STATE 32: | 30920.66 |          |               |   |    |
|           | 0.96607  | 0.98289  | 0.00000 : 5   | 0 | 0  |
|           | 0.01285  | -0.11091 | -0.02341 : 10 | 1 | -1 |
|           | 0.01285  | -0.11091 | 0.02341 : 10  | 1 | 1  |
| STATE 33: | 31356.60 |          |               |   |    |
|           | 0.02739  | 0.15916  | 0.04533 : 5   | 0 | 0  |
|           | 0.01362  | 0.11224  | 0.03197 : 9   | 0 | 0  |
|           | 0.06651  | 0.07065  | -0.24803 : 10 | 1 | 0  |
|           | 0.43435  | 0.56014  | 0.34726 : 10  | 1 | -1 |
|           | 0.43435  | 0.65905  | -0.00000 : 10 | 1 | 1  |
| STATE 34: | 31363.61 |          |               |   |    |
|           | 0.76020  | 0.87190  | 0.00000 : 10  | 1 | 0  |
|           | 0.09059  | -0.19295 | -0.23100 : 10 | 1 | -1 |
|           | 0.01969  | 0.02935  | -0.13722 : 11 | 1 | -1 |
|           | 0.09059  | 0.19295  | -0.23100 : 10 | 1 | 1  |
|           | 0.01969  | -0.02935 | -0.13722 : 11 | 1 | 1  |
| STATE 35: | 31371.99 |          |               |   |    |
|           | 0.11801  | 0.33836  | -0.05938 : 10 | 1 | 0  |
|           | 0.43602  | 0.66032  | -0.00000 : 10 | 1 | -1 |
|           | 0.43602  | -0.62086 | 0.22485 : 10  | 1 | 1  |
| STATE 36: | 31486.86 |          |               |   |    |
|           | 0.04042  | 0.04708  | -0.19546 : 10 | 1 | 0  |
|           | 0.07308  | 0.06330  | -0.26281 : 11 | 1 | 0  |
|           | 0.03706  | -0.04508 | 0.18716 : 12  | 1 | 0  |
|           | 0.39637  | 0.56054  | 0.28664 : 11  | 1 | -1 |
|           | 0.01210  | -0.01249 | 0.10930 : 12  | 1 | -1 |
|           | 0.39637  | 0.62958  | -0.00000 : 11 | 1 | 1  |
|           | 0.01210  | 0.03864  | -0.10300 : 12 | 1 | 1  |
| STATE 37: | 31529.21 |          |               |   |    |
|           | 0.02357  | -0.00000 | -0.15352 : 3  | 0 | 0  |
|           | 0.02682  | 0.00000  | -0.16378 : 7  | 0 | 0  |
|           | 0.03557  | -0.00000 | -0.18861 : 9  | 0 | 0  |
|           | 0.74207  | 0.86143  | -0.00000 : 11 | 1 | 0  |
|           | 0.04816  | -0.06926 | -0.20824 : 11 | 1 | -1 |
|           | 0.01229  | -0.02339 | 0.10835 : 12  | 1 | -1 |
|           | 0.04816  | 0.06926  | -0.20824 : 11 | 1 | 1  |
|           | 0.01229  | 0.02339  | 0.10835 : 12  | 1 | 1  |
| STATE 38: | 31542.32 |          |               |   |    |
|           | 0.01903  | 0.02516  | 0.13562 : 3   | 0 | 0  |
|           | 0.02806  | -0.03056 | -0.16469 : 7  | 0 | 0  |
|           | 0.02312  | 0.02774  | 0.14949 : 9   | 0 | 0  |
|           | 0.01601  | -0.12442 | 0.02309 : 8   | 1 | 0  |
|           | 0.02438  | 0.15352  | -0.02848 : 11 | 1 | 0  |
|           | 0.40447  | 0.63598  | 0.00000 : 11  | 1 | -1 |
|           | 0.01407  | -0.00770 | 0.11836 : 12  | 1 | -1 |
|           | 0.40447  | -0.59365 | 0.22814 : 11  | 1 | 1  |
|           | 0.01407  | 0.04965  | 0.10772 : 12  | 1 | 1  |
| STATE 39: | 31829.64 |          |               |   |    |
|           | 0.86947  | 0.93245  | 0.00000 : 6   | 0 | 0  |
|           | 0.02970  | -0.00000 | -0.17234 : 12 | 1 | 0  |
|           | 0.02634  | -0.06799 | 0.14736 : 12  | 1 | -1 |
|           | 0.02634  | -0.06799 | -0.14736 : 12 | 1 | 1  |
| STATE 40: | 31984.55 |          |               |   |    |
|           | 0.86362  | 0.92931  | 0.00000 : 7   | 0 | 0  |
|           | 0.04157  | 0.00000  | -0.20388 : 11 | 1 | 0  |
|           | 0.01449  | -0.02048 | -0.11862 : 11 | 1 | -1 |
|           | 0.01632  | -0.12673 | -0.01621 : 12 | 1 | -1 |
|           | 0.01449  | -0.02048 | 0.11862 : 11  | 1 | 1  |
|           | 0.01632  | -0.12673 | 0.01621 : 12  | 1 | 1  |
| STATE 41: | 32183.87 |          |               |   |    |
|           | 0.03520  | -0.00000 | -0.18762 : 6  | 0 | 0  |
|           | 0.28545  | 0.53427  | 0.00000 : 12  | 1 | 0  |
|           | 0.08117  | 0.28491  | 0.00000 : 13  | 1 | 0  |
|           | 0.18465  | -0.40586 | -0.14117 : 12 | 1 | -1 |
|           | 0.09798  | -0.16475 | 0.26615 : 13  | 1 | -1 |
|           | 0.18465  | 0.40586  | -0.14117 : 12 | 1 | 1  |
|           | 0.09798  | 0.16475  | 0.26615 : 13  | 1 | 1  |
| STATE 42: | 32186.11 |          |               |   |    |
|           | 0.01731  | 0.00000  | 0.13158 : 8   | 0 | 0  |

|           |          |          |      |   |    |
|-----------|----------|----------|------|---|----|
| 0.39534   | 0.62876  | 0.00000  | : 12 | 1 | 0  |
| 0.02917   | 0.17078  | 0.00000  | : 13 | 1 | 0  |
| 0.02557   | -0.02544 | 0.15788  | : 11 | 1 | -1 |
| 0.19644   | 0.43564  | -0.08163 | : 12 | 1 | -1 |
| 0.02301   | 0.15169  | -0.00141 | : 13 | 1 | -1 |
| 0.01276   | -0.02517 | 0.11013  | : 15 | 1 | -1 |
| 0.02557   | 0.02544  | 0.15788  | : 11 | 1 | 1  |
| 0.19644   | -0.43564 | -0.08163 | : 12 | 1 | 1  |
| 0.02301   | -0.15169 | -0.00141 | : 13 | 1 | 1  |
| 0.01276   | 0.02517  | 0.11013  | : 15 | 1 | 1  |
| STATE 43: | 32212.88 |          |      |   |    |
| 0.04620   | 0.21492  | 0.00354  | : 7  | 0 | 0  |
| 0.01229   | -0.00182 | 0.11084  | : 11 | 1 | 0  |
| 0.04959   | 0.00366  | -0.22266 | : 12 | 1 | 0  |
| 0.03915   | -0.00326 | 0.19785  | : 13 | 1 | 0  |
| 0.35426   | 0.59519  | -0.00000 | : 12 | 1 | -1 |
| 0.04270   | 0.19950  | 0.05387  | : 13 | 1 | -1 |
| 0.35426   | 0.59487  | 0.01959  | : 12 | 1 | 1  |
| 0.04270   | 0.20117  | -0.04727 | : 13 | 1 | 1  |
| STATE 44: | 32222.56 |          |      |   |    |
| 0.01584   | -0.00000 | -0.12585 | : 8  | 0 | 0  |
| 0.01474   | -0.12140 | 0.00000  | : 12 | 1 | 0  |
| 0.68109   | 0.82528  | -0.00000 | : 13 | 1 | 0  |
| 0.04650   | -0.06663 | 0.20507  | : 12 | 1 | -1 |
| 0.08335   | 0.24206  | -0.15734 | : 13 | 1 | -1 |
| 0.04650   | 0.06663  | 0.20507  | : 12 | 1 | 1  |
| 0.08335   | -0.24206 | -0.15734 | : 13 | 1 | 1  |
| STATE 45: | 32223.36 |          |      |   |    |
| 0.01105   | -0.05856 | -0.08732 | : 7  | 0 | 0  |
| 0.04140   | -0.11333 | -0.16900 | : 8  | 0 | 0  |
| 0.03584   | -0.15723 | 0.10544  | : 13 | 1 | 0  |
| 0.01148   | -0.09925 | -0.04035 | : 12 | 1 | -1 |
| 0.43643   | 0.66063  | 0.00000  | : 13 | 1 | -1 |
| 0.01148   | 0.00034  | -0.10714 | : 12 | 1 | 1  |
| 0.43643   | -0.25078 | 0.61118  | : 13 | 1 | 1  |
| STATE 46: | 32231.90 |          |      |   |    |
| 0.90331   | 0.95043  | 0.00000  | : 8  | 0 | 0  |
| 0.01989   | 0.06970  | 0.12258  | : 12 | 1 | -1 |
| 0.02103   | 0.06290  | -0.13066 | : 13 | 1 | -1 |
| 0.01989   | 0.06970  | -0.12258 | : 12 | 1 | 1  |
| 0.02103   | 0.06290  | 0.13066  | : 13 | 1 | 1  |
| STATE 47: | 32248.21 |          |      |   |    |
| 0.05188   | 0.20040  | 0.10825  | : 6  | 0 | 0  |
| 0.11299   | -0.15975 | 0.29575  | : 12 | 1 | 0  |
| 0.11940   | 0.16422  | -0.30402 | : 13 | 1 | 0  |
| 0.06220   | 0.07523  | -0.23777 | : 12 | 1 | -1 |
| 0.28158   | 0.29094  | 0.44378  | : 13 | 1 | -1 |
| 0.06220   | -0.15760 | 0.19328  | : 12 | 1 | 1  |
| 0.28158   | 0.53064  | 0.00000  | : 13 | 1 | 1  |
| STATE 48: | 32629.64 |          |      |   |    |
| 0.69952   | 0.83638  | 0.00000  | : 9  | 0 | 0  |
| 0.01985   | -0.00000 | -0.14088 | : 11 | 1 | 0  |
| 0.05173   | -0.00000 | -0.22744 | : 15 | 1 | 0  |
| 0.01782   | -0.05254 | 0.12270  | : 11 | 1 | -1 |
| 0.03213   | 0.17874  | -0.01350 | : 14 | 1 | -1 |
| 0.04346   | -0.07113 | 0.19597  | : 15 | 1 | -1 |
| 0.01782   | -0.05254 | -0.12270 | : 11 | 1 | 1  |
| 0.03213   | 0.17874  | 0.01350  | : 14 | 1 | 1  |
| 0.04346   | -0.07113 | -0.19597 | : 15 | 1 | 1  |
| STATE 49: | 33014.93 |          |      |   |    |
| 0.32281   | 0.56817  | 0.00000  | : 14 | 1 | 0  |
| 0.30546   | -0.55236 | -0.01886 | : 14 | 1 | -1 |
| 0.02242   | 0.00972  | -0.14943 | : 16 | 1 | -1 |
| 0.30546   | 0.55236  | -0.01886 | : 14 | 1 | 1  |
| 0.02242   | -0.00972 | -0.14943 | : 16 | 1 | 1  |
| STATE 50: | 33039.05 |          |      |   |    |
| 0.64284   | 0.80178  | 0.00000  | : 14 | 1 | 0  |
| 0.17453   | 0.41589  | -0.03951 | : 14 | 1 | -1 |
| 0.17453   | -0.41589 | -0.03951 | : 14 | 1 | 1  |
| STATE 51: | 33051.53 |          |      |   |    |
| 0.05755   | -0.23990 | -0.00006 | : 9  | 0 | 0  |
| 0.02083   | 0.00004  | -0.14432 | : 16 | 1 | 0  |
| 0.43956   | 0.66300  | 0.00000  | : 14 | 1 | -1 |

|           |          |          |               |   |    |
|-----------|----------|----------|---------------|---|----|
|           | 0.01142  | -0.01684 | 0.10555 : 16  | 1 | -1 |
|           | 0.43956  | 0.66300  | 0.00035 : 14  | 1 | 1  |
|           | 0.01142  | -0.01679 | -0.10555 : 16 | 1 | 1  |
| STATE 52: | 33412.50 |          |               |   |    |
|           | 0.50556  | 0.71103  | 0.00000 : 16  | 1 | 0  |
|           | 0.19870  | 0.44286  | -0.05078 : 16 | 1 | -1 |
|           | 0.02931  | 0.03490  | -0.16762 : 18 | 1 | -1 |
|           | 0.19870  | -0.44286 | -0.05078 : 16 | 1 | 1  |
|           | 0.02931  | -0.03490 | -0.16762 : 18 | 1 | 1  |
| STATE 53: | 33417.46 |          |               |   |    |
|           | 0.02236  | 0.03054  | -0.14639 : 14 | 1 | 0  |
|           | 0.06244  | 0.05104  | -0.24461 : 16 | 1 | 0  |
|           | 0.03474  | 0.03807  | -0.18246 : 18 | 1 | 0  |
|           | 0.01619  | -0.06942 | 0.10663 : 14  | 1 | -1 |
|           | 0.39886  | 0.57885  | 0.25256 : 16  | 1 | -1 |
|           | 0.01410  | 0.01135  | -0.11820 : 18 | 1 | -1 |
|           | 0.01619  | -0.02099 | -0.12549 : 14 | 1 | 1  |
|           | 0.39886  | 0.63155  | 0.00000 : 16  | 1 | 1  |
|           | 0.01410  | -0.03687 | 0.11287 : 18  | 1 | 1  |
| STATE 54: | 33481.97 |          |               |   |    |
|           | 0.04512  | 0.00000  | -0.21241 : 16 | 0 | 0  |
|           | 0.32349  | 0.56876  | 0.00000 : 16  | 1 | 0  |
|           | 0.02013  | 0.02460  | -0.13974 : 14 | 1 | -1 |
|           | 0.28202  | -0.48480 | -0.21677 : 16 | 1 | -1 |
|           | 0.02013  | -0.02460 | -0.13974 : 14 | 1 | 1  |
|           | 0.28202  | 0.48480  | -0.21677 : 16 | 1 | 1  |
| STATE 55: | 33844.40 |          |               |   |    |
|           | 0.01112  | 0.02190  | -0.10316 : 3  | 1 | 0  |
|           | 0.01827  | -0.02807 | 0.13222 : 12  | 1 | 0  |
|           | 0.05310  | 0.04785  | -0.22542 : 15 | 1 | 0  |
|           | 0.43470  | 0.60246  | 0.26785 : 15  | 1 | -1 |
|           | 0.43470  | 0.65932  | 0.00000 : 15  | 1 | 1  |
| STATE 56: | 33927.07 |          |               |   |    |
|           | 0.48687  | 0.69776  | 0.00000 : 15  | 1 | 0  |
|           | 0.01279  | -0.11311 | -0.00000 : 16 | 1 | 0  |
|           | 0.21376  | 0.46153  | -0.02739 : 15 | 1 | -1 |
|           | 0.21376  | -0.46153 | -0.02739 : 15 | 1 | 1  |
| STATE 57: | 34018.37 |          |               |   |    |
|           | 0.03438  | 0.00000  | 0.18542 : 3   | 0 | 0  |
|           | 0.13414  | -0.00000 | -0.36626 : 9  | 0 | 0  |
|           | 0.33295  | 0.57702  | 0.00000 : 15  | 1 | 0  |
|           | 0.23466  | -0.44327 | -0.19538 : 15 | 1 | -1 |
|           | 0.23466  | 0.44327  | -0.19538 : 15 | 1 | 1  |
| STATE 58: | 34629.91 |          |               |   |    |
|           | 0.80505  | 0.89725  | -0.00000 : 10 | 0 | 0  |
|           | 0.07593  | 0.27555  | 0.00000 : 11  | 0 | 0  |
|           | 0.03636  | 0.00000  | -0.19068 : 18 | 1 | 0  |
|           | 0.03892  | -0.07638 | 0.18190 : 18  | 1 | -1 |
|           | 0.03892  | -0.07638 | -0.18190 : 18 | 1 | 1  |
| STATE 59: | 35215.30 |          |               |   |    |
|           | 0.09537  | -0.30882 | 0.00000 : 10  | 0 | 0  |
|           | 0.88084  | 0.93853  | 0.00000 : 11  | 0 | 0  |
| STATE 60: | 35446.65 |          |               |   |    |
|           | 0.98095  | 0.99043  | -0.00000 : 12 | 0 | 0  |
| STATE 61: | 35976.50 |          |               |   |    |
|           | 0.93708  | 0.96803  | 0.00000 : 13  | 0 | 0  |
|           | 0.03647  | -0.00000 | -0.19097 : 18 | 1 | 0  |
| STATE 62: | 36854.74 |          |               |   |    |
|           | 0.19774  | 0.31486  | -0.31401 : 17 | 1 | 0  |
|           | 0.39599  | -0.00171 | 0.62927 : 17  | 1 | -1 |
|           | 0.39599  | 0.62927  | 0.00000 : 17  | 1 | 1  |
| STATE 63: | 36855.85 |          |               |   |    |
|           | 0.24602  | -0.43651 | -0.23553 : 17 | 1 | 0  |
|           | 0.37143  | -0.33460 | -0.50939 : 17 | 1 | -1 |
|           | 0.37143  | 0.60945  | 0.00000 : 17  | 1 | 1  |
| STATE 64: | 36856.16 |          |               |   |    |
|           | 0.54312  | 0.73697  | -0.00000 : 17 | 1 | 0  |
|           | 0.22249  | -0.09304 | -0.46242 : 17 | 1 | -1 |
|           | 0.22249  | 0.09304  | -0.46242 : 17 | 1 | 1  |
| STATE 65: | 37383.00 |          |               |   |    |
|           | 0.01093  | -0.10441 | 0.00517 : 17  | 0 | 0  |
|           | 0.01349  | 0.11303  | -0.02674 : 18 | 1 | -1 |
|           | 0.46706  | 0.68342  | 0.00000 : 19  | 1 | -1 |

|           |          |               |   |    |
|-----------|----------|---------------|---|----|
| 0.01349   | 0.11512  | 0.01545 : 18  | 1 | 1  |
| 0.46706   | 0.68008  | -0.06751 : 19 | 1 | 1  |
| STATE 66: | 37391.80 |               |   |    |
| 0.16437   | -0.40424 | -0.03109 : 19 | 1 | 0  |
| 0.40608   | -0.62975 | -0.09746 : 19 | 1 | -1 |
| 0.40608   | 0.63724  | 0.00000 : 19  | 1 | 1  |
| STATE 67: | 37394.31 |               |   |    |
| 0.81207   | 0.90115  | -0.00000 : 19 | 1 | 0  |
| 0.08719   | -0.29293 | 0.03722 : 19  | 1 | -1 |
| 0.08719   | 0.29293  | 0.03722 : 19  | 1 | 1  |
| STATE 68: | 37478.13 |               |   |    |
| 0.01383   | -0.11564 | -0.02147 : 17 | 0 | 0  |
| 0.24594   | 0.09052  | -0.48759 : 20 | 1 | 0  |
| 0.35187   | 0.55365  | 0.21292 : 20  | 1 | -1 |
| 0.35187   | 0.59318  | 0.00000 : 20  | 1 | 1  |
| STATE 69: | 37487.81 |               |   |    |
| 0.10836   | 0.30391  | 0.12648 : 20  | 1 | 0  |
| 0.43989   | -0.46741 | -0.47055 : 20 | 1 | -1 |
| 0.43989   | 0.66324  | 0.00000 : 20  | 1 | 1  |
| STATE 70: | 37489.70 |               |   |    |
| 0.62554   | 0.79091  | 0.00000 : 20  | 1 | 0  |
| 0.18565   | 0.32802  | -0.27937 : 20 | 1 | -1 |
| 0.18565   | -0.32802 | -0.27937 : 20 | 1 | 1  |
| STATE 71: | 37667.09 |               |   |    |
| 0.70750   | 0.84113  | -0.00000 : 14 | 0 | 0  |
| 0.20293   | 0.45048  | -0.00000 : 15 | 0 | 0  |
| 0.02206   | -0.14853 | 0.00000 : 16  | 0 | 0  |
| 0.01915   | 0.00000  | 0.13838 : 18  | 1 | 0  |
| 0.01775   | 0.00855  | 0.13296 : 18  | 1 | -1 |
| 0.01775   | 0.00855  | -0.13296 : 18 | 1 | 1  |
| STATE 72: | 37691.25 |               |   |    |
| 0.26381   | -0.51362 | -0.00000 : 14 | 0 | 0  |
| 0.67745   | 0.82307  | 0.00000 : 15  | 0 | 0  |
| 0.01923   | 0.00000  | 0.13868 : 18  | 1 | 0  |
| 0.01399   | -0.00392 | 0.11823 : 18  | 1 | -1 |
| 0.01399   | -0.00392 | -0.11823 : 18 | 1 | 1  |
| STATE 73: | 37722.48 |               |   |    |
| 0.08016   | 0.00000  | -0.28313 : 10 | 0 | 0  |
| 0.02135   | 0.00000  | -0.14611 : 11 | 0 | 0  |
| 0.13926   | -0.00000 | 0.37318 : 17  | 0 | 0  |
| 0.25641   | 0.50637  | 0.00000 : 18  | 1 | 0  |
| 0.01290   | 0.11357  | 0.00000 : 20  | 1 | 0  |
| 0.20512   | -0.42399 | -0.15922 : 18 | 1 | -1 |
| 0.01018   | -0.01725 | 0.09939 : 20  | 1 | -1 |
| 0.20512   | 0.42399  | -0.15922 : 18 | 1 | 1  |
| 0.01018   | 0.01725  | 0.09939 : 20  | 1 | 1  |
| STATE 74: | 37786.90 |               |   |    |
| 0.03479   | -0.03588 | -0.18304 : 16 | 1 | 0  |
| 0.04786   | -0.04209 | -0.21468 : 18 | 1 | 0  |
| 0.01329   | -0.03231 | -0.11066 : 16 | 1 | -1 |
| 0.41090   | 0.64101  | 0.00000 : 18  | 1 | -1 |
| 0.01174   | -0.08771 | 0.06361 : 19  | 1 | -1 |
| 0.01329   | 0.01187  | 0.11467 : 16  | 1 | 1  |
| 0.41090   | 0.59357  | -0.24202 : 18 | 1 | 1  |
| 0.01174   | -0.10523 | -0.02579 : 19 | 1 | 1  |
| STATE 75: | 38011.79 |               |   |    |
| 0.02397   | 0.00000  | -0.15484 : 1  | 0 | 0  |
| 0.04696   | 0.00000  | -0.21670 : 13 | 0 | 0  |
| 0.10810   | -0.00000 | 0.32878 : 15  | 0 | 0  |
| 0.42452   | 0.65156  | 0.00000 : 18  | 1 | 0  |
| 0.02323   | 0.03157  | -0.14910 : 16 | 1 | -1 |
| 0.15784   | 0.39576  | -0.03484 : 18 | 1 | -1 |
| 0.02323   | -0.03157 | -0.14910 : 16 | 1 | 1  |
| 0.15784   | -0.39576 | -0.03484 : 18 | 1 | 1  |
| STATE 76: | 38515.37 |               |   |    |
| 0.01556   | 0.12473  | 0.00000 : 14  | 0 | 0  |
| 0.90464   | 0.95113  | -0.00000 : 16 | 0 | 0  |
| 0.01233   | -0.00000 | -0.11103 : 1  | 1 | 0  |
| 0.01740   | 0.00000  | -0.13192 : 16 | 1 | 0  |
| 0.01474   | -0.04961 | 0.11083 : 16  | 1 | -1 |
| 0.01474   | -0.04961 | -0.11083 : 16 | 1 | 1  |
| STATE 77: | 38734.78 |               |   |    |
| 0.83156   | 0.91190  | 0.00000 : 17  | 0 | 0  |

|           |          |         |               |   |    |
|-----------|----------|---------|---------------|---|----|
|           | 0.05279  | 0.00000 | 0.22975 : 18  | 1 | 0  |
|           | 0.04406  | 0.08670 | -0.19116 : 18 | 1 | -1 |
|           | 0.04406  | 0.08670 | 0.19116 : 18  | 1 | 1  |
| STATE 78: | 40069.20 |         |               |   |    |
|           | 0.99809  | 0.99905 | 0.00000 : 18  | 0 | 0  |
| STATE 79: | 40834.70 |         |               |   |    |
|           | 0.99967  | 0.99984 | 0.00000 : 19  | 0 | 0  |
| STATE 80: | 42709.88 |         |               |   |    |
|           | 0.99604  | 0.99802 | -0.00000 : 20 | 0 | 0  |

**Table S16.** TD-DFT excited states (triplets) of **LBI**. Note that the correction factor of 1430 cm<sup>-1</sup> has not been subtracted from these values.

STATE 1: E= 0.058568 au 1.594 eV 12854.3 cm<sup>-1</sup> <S<sup>2</sup>> = 2.000000  
 139a -> 140a : 0.994482

STATE 2: E= 0.075348 au 2.050 eV 16536.9 cm<sup>-1</sup> <S<sup>2</sup>> = 2.000000  
 139a -> 141a : 0.979703

STATE 3: E= 0.105853 au 2.880 eV 23232.2 cm<sup>-1</sup> <S<sup>2</sup>> = 2.000000  
 139a -> 142a : 0.607670  
 139a -> 147a : 0.343252  
 139a -> 151a : 0.023850

STATE 4: E= 0.112851 au 3.071 eV 24767.8 cm<sup>-1</sup> <S<sup>2</sup>> = 2.000000  
 130a -> 148a : 0.016915  
 133a -> 140a : 0.789563  
 133a -> 152a : 0.010244  
 134a -> 141a : 0.108363  
 139a -> 148a : 0.013040

STATE 5: E= 0.126881 au 3.453 eV 27847.2 cm<sup>-1</sup> <S<sup>2</sup>> = 2.000000  
 131a -> 140a : 0.027160  
 134a -> 140a : 0.056754  
 137a -> 141a : 0.022053  
 138a -> 140a : 0.795634

STATE 6: E= 0.128159 au 3.487 eV 28127.7 cm<sup>-1</sup> <S<sup>2</sup>> = 2.000000  
 133a -> 141a : 0.047510  
 134a -> 140a : 0.756336  
 138a -> 140a : 0.064908  
 139a -> 143a : 0.018597  
 139a -> 152a : 0.014694

STATE 7: E= 0.128649 au 3.501 eV 28235.1 cm<sup>-1</sup> <S<sup>2</sup>> = 2.000000  
 139a -> 143a : 0.858966  
 139a -> 149a : 0.039603  
 139a -> 150a : 0.026113

STATE 8: E= 0.129833 au 3.533 eV 28495.1 cm<sup>-1</sup> <S<sup>2</sup>> = 2.000000  
 131a -> 142a : 0.015993  
 134a -> 140a : 0.032970  
 135a -> 144a : 0.061591  
 135a -> 145a : 0.148998  
 135a -> 146a : 0.022829  
 136a -> 144a : 0.105859  
 137a -> 142a : 0.032881  
 137a -> 143a : 0.126891  
 137a -> 145a : 0.010384  
 137a -> 146a : 0.054866  
 138a -> 142a : 0.211385  
 138a -> 143a : 0.022167  
 138a -> 147a : 0.038989  
 139a -> 145a : 0.010220

STATE 9: E= 0.130079 au 3.540 eV 28549.1 cm<sup>-1</sup> <S<sup>2</sup>> = 2.000000  
 131a -> 143a : 0.011675  
 135a -> 144a : 0.110194  
 136a -> 144a : 0.057236  
 136a -> 145a : 0.143242  
 136a -> 146a : 0.027550  
 137a -> 142a : 0.176335  
 137a -> 143a : 0.017524  
 137a -> 147a : 0.036811  
 138a -> 140a : 0.035016  
 138a -> 142a : 0.027580  
 138a -> 143a : 0.149267  
 138a -> 145a : 0.011772  
 138a -> 146a : 0.062135  
 139a -> 143a : 0.013938  
 139a -> 144a : 0.018725

STATE 10: E= 0.135658 au 3.691 eV 29773.4 cm<sup>-1</sup> <S<sup>\*\*2</sup>> = 2.000000  
133a -> 140a : 0.018603  
139a -> 144a : 0.660668  
139a -> 147a : 0.013087  
139a -> 148a : 0.260566

STATE 11: E= 0.135942 au 3.699 eV 29835.7 cm<sup>-1</sup> <S<sup>\*\*2</sup>> = 2.000000  
139a -> 145a : 0.135110  
139a -> 146a : 0.686982  
139a -> 149a : 0.107177  
139a -> 150a : 0.035619

STATE 12: E= 0.139034 au 3.783 eV 30514.5 cm<sup>-1</sup> <S<sup>\*\*2</sup>> = 2.000000  
139a -> 142a : 0.357763  
139a -> 144a : 0.022434  
139a -> 147a : 0.593320

STATE 13: E= 0.139587 au 3.798 eV 30635.7 cm<sup>-1</sup> <S<sup>\*\*2</sup>> = 2.000000  
139a -> 145a : 0.816607  
139a -> 146a : 0.156263

STATE 14: E= 0.143261 au 3.898 eV 31442.1 cm<sup>-1</sup> <S<sup>\*\*2</sup>> = 2.000000  
133a -> 140a : 0.018949  
134a -> 141a : 0.011990  
139a -> 144a : 0.279035  
139a -> 148a : 0.653932

STATE 15: E= 0.145923 au 3.971 eV 32026.5 cm<sup>-1</sup> <S<sup>\*\*2</sup>> = 2.000000  
139a -> 143a : 0.057657  
139a -> 145a : 0.017725  
139a -> 146a : 0.102935  
139a -> 149a : 0.737854  
139a -> 154a : 0.017116

STATE 16: E= 0.146040 au 3.974 eV 32052.0 cm<sup>-1</sup> <S<sup>\*\*2</sup>> = 2.000000  
129a -> 140a : 0.012342  
131a -> 141a : 0.014245  
137a -> 140a : 0.562302  
138a -> 141a : 0.334822  
138a -> 148a : 0.018512  
139a -> 149a : 0.012785

STATE 17: E= 0.160656 au 4.372 eV 35259.8 cm<sup>-1</sup> <S<sup>\*\*2</sup>> = 2.000000  
128a -> 140a : 0.012827  
133a -> 140a : 0.100076  
134a -> 141a : 0.737031  
134a -> 148a : 0.026194  
139a -> 148a : 0.040995

STATE 18: E= 0.161321 au 4.390 eV 35405.9 cm<sup>-1</sup> <S<sup>\*\*2</sup>> = 2.000000  
132a -> 140a : 0.955460

STATE 19: E= 0.163114 au 4.439 eV 35799.4 cm<sup>-1</sup> <S<sup>\*\*2</sup>> = 2.000000  
135a -> 140a : 0.195577  
136a -> 140a : 0.494458  
136a -> 141a : 0.020546  
136a -> 142a : 0.017693  
136a -> 143a : 0.013904  
136a -> 144a : 0.023104  
136a -> 146a : 0.016620  
137a -> 144a : 0.019790  
137a -> 145a : 0.023183  
138a -> 142a : 0.018524  
138a -> 144a : 0.031782  
138a -> 145a : 0.030744

STATE 20: E= 0.163558 au 4.451 eV 35896.8 cm<sup>-1</sup> <S<sup>\*\*2</sup>> = 2.000000  
135a -> 140a : 0.559091  
135a -> 141a : 0.019758  
135a -> 144a : 0.032867  
135a -> 145a : 0.027715  
136a -> 140a : 0.229059  
136a -> 144a : 0.012130

137a -> 142a : 0.015230  
 138a -> 142a : 0.023709  
 138a -> 143a : 0.013543

**Table S17.** Calculated SOC values between singlet and triplet states.

| T | S  | SOCC [cm <sup>-1</sup> ] | T | S  | SOCC [cm <sup>-1</sup> ] | T  | S  | SOCC [cm <sup>-1</sup> ] | T  | S  | SOCC [cm <sup>-1</sup> ] | T  | S  | SOCC [cm <sup>-1</sup> ] | T | S | SOCC [cm <sup>-1</sup> ] |
|---|----|--------------------------|---|----|--------------------------|----|----|--------------------------|----|----|--------------------------|----|----|--------------------------|---|---|--------------------------|
| 1 | 0  | 26.83311                 | 5 | 0  | 397.6778                 | 9  | 0  | 97.80565                 | 13 | 0  | 96.35074                 | 17 | 0  | 41.3826                  |   |   |                          |
| 1 | 1  | 2.19399                  | 5 | 1  | 177.64771                | 9  | 1  | 55.46283                 | 13 | 1  | 13.70316                 | 17 | 1  | 324.41473                |   |   |                          |
| 1 | 2  | 10.41983                 | 5 | 2  | 292.03547                | 9  | 2  | 100.56979                | 13 | 2  | 34.0816                  | 17 | 2  | 51.5662                  |   |   |                          |
| 1 | 3  | 21.8098                  | 5 | 3  | 43.53696                 | 9  | 3  | 261.59614                | 13 | 3  | 16.72996                 | 17 | 3  | 15.64712                 |   |   |                          |
| 1 | 4  | 7.15322                  | 5 | 4  | 48.70459                 | 9  | 4  | 77.03597                 | 13 | 4  | 48.50421                 | 17 | 4  | 117.86572                |   |   |                          |
| 1 | 5  | 371.79368                | 5 | 5  | 12.92731                 | 9  | 5  | 14.66328                 | 13 | 5  | 14.82044                 | 17 | 5  | 16.48043                 |   |   |                          |
| 1 | 6  | 33.41163                 | 5 | 6  | 53.38891                 | 9  | 6  | 88.70327                 | 13 | 6  | 49.68993                 | 17 | 6  | 47.60928                 |   |   |                          |
| 1 | 7  | 4.86608                  | 5 | 7  | 59.48738                 | 9  | 7  | 15.05226                 | 13 | 7  | 7.75728                  | 17 | 7  | 5.23506                  |   |   |                          |
| 1 | 8  | 0.15906                  | 5 | 8  | 11.16436                 | 9  | 8  | 2.26641                  | 13 | 8  | 3.88497                  | 17 | 8  | 2.29691                  |   |   |                          |
| 1 | 9  | 8.69295                  | 5 | 9  | 70.32624                 | 9  | 9  | 281.32981                | 13 | 9  | 6.37957                  | 17 | 9  | 21.25126                 |   |   |                          |
| 1 | 10 | 911.36856                | 5 | 10 | 72.30723                 | 9  | 10 | 21.9953                  | 13 | 10 | 11.83115                 | 17 | 10 | 85.23678                 |   |   |                          |
| 1 | 11 | 404.36085                | 5 | 11 | 73.10031                 | 9  | 11 | 40.48139                 | 13 | 11 | 26.88064                 | 17 | 11 | 90.95756                 |   |   |                          |
| 1 | 12 | 7.17468                  | 5 | 12 | 162.34168                | 9  | 12 | 53.76313                 | 13 | 12 | 3.73229                  | 17 | 12 | 10.57685                 |   |   |                          |
| 1 | 13 | 125.87966                | 5 | 13 | 34.7857                  | 9  | 13 | 16.9662                  | 13 | 13 | 3.20729                  | 17 | 13 | 49.37412                 |   |   |                          |
| 1 | 14 | 492.56199                | 5 | 14 | 22.47869                 | 9  | 14 | 6.42767                  | 13 | 14 | 9.33639                  | 17 | 14 | 5.36703                  |   |   |                          |
| 1 | 15 | 290.46776                | 5 | 15 | 17.75834                 | 9  | 15 | 4.85012                  | 13 | 15 | 6.16838                  | 17 | 15 | 10.39066                 |   |   |                          |
| 1 | 16 | 3327.38822               | 5 | 16 | 139.56278                | 9  | 16 | 42.72356                 | 13 | 16 | 49.55118                 | 17 | 16 | 28.31362                 |   |   |                          |
| 1 | 17 | 424.52991                | 5 | 17 | 82.44264                 | 9  | 17 | 84.01717                 | 13 | 17 | 44.44679                 | 17 | 17 | 28.93222                 |   |   |                          |
| 1 | 18 | 36.93732                 | 5 | 18 | 49.2605                  | 9  | 18 | 22.86508                 | 13 | 18 | 13.47784                 | 17 | 18 | 4.70894                  |   |   |                          |
| 1 | 19 | 23.48185                 | 5 | 19 | 14.6851                  | 9  | 19 | 15.87441                 | 13 | 19 | 6.56415                  | 17 | 19 | 33.80238                 |   |   |                          |
| 1 | 20 | 20.27605                 | 5 | 20 | 62.03222                 | 9  | 20 | 54.86588                 | 13 | 20 | 6.77242                  | 17 | 20 | 46.13395                 |   |   |                          |
| 2 | 0  | 15.95271                 | 6 | 0  | 154.90373                | 10 | 0  | 126.71493                | 14 | 0  | 189.00125                | 18 | 0  | 203.88134                |   |   |                          |
| 2 | 1  | 11.95276                 | 6 | 1  | 80.23935                 | 10 | 1  | 18.96171                 | 14 | 1  | 24.29609                 | 18 | 1  | 3391.14153               |   |   |                          |
| 2 | 2  | 30.32504                 | 6 | 2  | 120.17273                | 10 | 2  | 44.07545                 | 14 | 2  | 116.19608                | 18 | 2  | 166.02289                |   |   |                          |
| 2 | 3  | 1907.02482               | 6 | 3  | 92.02018                 | 10 | 3  | 76.90144                 | 14 | 3  | 186.9744                 | 18 | 3  | 7.22835                  |   |   |                          |
| 2 | 4  | 184.15462                | 6 | 4  | 33.00677                 | 10 | 4  | 11.48394                 | 14 | 4  | 23.42354                 | 18 | 4  | 8.84472                  |   |   |                          |
| 2 | 5  | 156.90476                | 6 | 5  | 44.68251                 | 10 | 5  | 77.22131                 | 14 | 5  | 66.58275                 | 18 | 5  | 18.88284                 |   |   |                          |
| 2 | 6  | 287.52447                | 6 | 6  | 43.87365                 | 10 | 6  | 43.14532                 | 14 | 6  | 14.52553                 | 18 | 6  | 26.96372                 |   |   |                          |
| 2 | 7  | 12.27026                 | 6 | 7  | 22.22157                 | 10 | 7  | 7.51745                  | 14 | 7  | 20.48778                 | 18 | 7  | 66.58902                 |   |   |                          |
| 2 | 8  | 8.35756                  | 6 | 8  | 3.71046                  | 10 | 8  | 3.54105                  | 14 | 8  | 4.26597                  | 18 | 8  | 18.57816                 |   |   |                          |
| 2 | 9  | 820.43826                | 6 | 9  | 51.77319                 | 10 | 9  | 128.0144                 | 14 | 9  | 112.35861                | 18 | 9  | 6.59143                  |   |   |                          |
| 2 | 10 | 201.19065                | 6 | 10 | 186.66035                | 10 | 10 | 20.82729                 | 14 | 10 | 13.33264                 | 18 | 10 | 799.59221                |   |   |                          |
| 2 | 11 | 668.15469                | 6 | 11 | 70.95001                 | 10 | 11 | 115.50359                | 14 | 11 | 36.10969                 | 18 | 11 | 364.42196                |   |   |                          |
| 2 | 12 | 86.55348                 | 6 | 12 | 49.53984                 | 10 | 12 | 16.18695                 | 14 | 12 | 19.78203                 | 18 | 12 | 67.99519                 |   |   |                          |
| 2 | 13 | 32.65644                 | 6 | 13 | 21.01646                 | 10 | 13 | 5.53069                  | 14 | 13 | 7.60076                  | 18 | 13 | 483.96278                |   |   |                          |
| 2 | 14 | 16.53231                 | 6 | 14 | 64.97819                 | 10 | 14 | 0.70915                  | 14 | 14 | 8.84707                  | 18 | 14 | 32.11692                 |   |   |                          |
| 2 | 15 | 9.37148                  | 6 | 15 | 35.96149                 | 10 | 15 | 0.99217                  | 14 | 15 | 5.05512                  | 18 | 15 | 100.96981                |   |   |                          |
| 2 | 16 | 110.10416                | 6 | 16 | 438.01647                | 10 | 16 | 33.16623                 | 14 | 16 | 32.18198                 | 18 | 16 | 18.63376                 |   |   |                          |
| 2 | 17 | 560.13031                | 6 | 17 | 53.9982                  | 10 | 17 | 50.23569                 | 14 | 17 | 31.88468                 | 18 | 17 | 346.33043                |   |   |                          |
| 2 | 18 | 5.27061                  | 6 | 18 | 22.51801                 | 10 | 18 | 14.20347                 | 14 | 18 | 24.58591                 | 18 | 18 | 28.33688                 |   |   |                          |
| 2 | 19 | 49.50693                 | 6 | 19 | 13.24714                 | 10 | 19 | 32.50799                 | 14 | 19 | 28.25059                 | 18 | 19 | 4.84897                  |   |   |                          |
| 2 | 20 | 359.30363                | 6 | 20 | 30.46173                 | 10 | 20 | 14.57756                 | 14 | 20 | 33.40717                 | 18 | 20 | 45.78987                 |   |   |                          |
| 3 | 0  | 5777.57286               | 7 | 0  | 877.63189                | 11 | 0  | 1051.11011               | 15 | 0  | 1353.08836               | 19 | 0  | 13.13959                 |   |   |                          |
| 3 | 1  | 115.76494                | 7 | 1  | 29.45266                 | 11 | 1  | 57.52831                 | 15 | 1  | 18.13825                 | 19 | 1  | 236.3925                 |   |   |                          |
| 3 | 2  | 1721.13956               | 7 | 2  | 665.28881                | 11 | 2  | 650.64183                | 15 | 2  | 1077.15088               | 19 | 2  | 1.27177                  |   |   |                          |
| 3 | 3  | 26.66755                 | 7 | 3  | 657.98441                | 11 | 3  | 760.62217                | 15 | 3  | 1035.25864               | 19 | 3  | 63.19293                 |   |   |                          |
| 3 | 4  | 430.71268                | 7 | 4  | 41.43113                 | 11 | 4  | 7.03246                  | 15 | 4  | 14.64489                 | 19 | 4  | 59.38279                 |   |   |                          |
| 3 | 5  | 4.39958                  | 7 | 5  | 11.65951                 | 11 | 5  | 14.93244                 | 15 | 5  | 11.353                   | 19 | 5  | 4.79402                  |   |   |                          |
| 3 | 6  | 472.45722                | 7 | 6  | 48.74294                 | 11 | 6  | 9.0621                   | 15 | 6  | 15.34602                 | 19 | 6  | 82.41373                 |   |   |                          |
| 3 | 7  | 250.26885                | 7 | 7  | 113.45051                | 11 | 7  | 122.75815                | 15 | 7  | 174.45929                | 19 | 7  | 122.04842                |   |   |                          |
| 3 | 8  | 23.89626                 | 7 | 8  | 4.23491                  | 11 | 8  | 3.63264                  | 15 | 8  | 4.32864                  | 19 | 8  | 136.81434                |   |   |                          |
| 3 | 9  | 11.3281                  | 7 | 9  | 313.95846                | 11 | 9  | 348.10779                | 15 | 9  | 471.25024                | 19 | 9  | 73.52391                 |   |   |                          |
| 3 | 10 | 392.58974                | 7 | 10 | 28.72867                 | 11 | 10 | 4.81083                  | 15 | 10 | 5.90523                  | 19 | 10 | 56.82089                 |   |   |                          |
| 3 | 11 | 869.54461                | 7 | 11 | 35.98258                 | 11 | 11 | 18.13636                 | 15 | 11 | 25.75797                 | 19 | 11 | 51.07657                 |   |   |                          |
| 3 | 12 | 157.62232                | 7 | 12 | 125.81572                | 11 | 12 | 101.42708                | 15 | 12 | 146.08496                | 19 | 12 | 25.57452                 |   |   |                          |
| 3 | 13 | 18.04241                 | 7 | 13 | 31.32318                 | 11 | 13 | 33.676                   | 15 | 13 | 31.98176                 | 19 | 13 | 37.90094                 |   |   |                          |
| 3 | 14 | 3.37837                  | 7 | 14 | 2.32284                  | 11 | 14 | 8.89264                  | 15 | 14 | 13.02396                 | 19 | 14 | 13.47265                 |   |   |                          |
| 3 | 15 | 1.29634                  | 7 | 15 | 5.88147                  | 11 | 15 | 4.77638                  | 15 | 15 | 6.99429                  | 19 | 15 | 10.64664                 |   |   |                          |
| 3 | 16 | 1.68932                  | 7 | 16 | 54.45303                 | 11 | 16 | 48.07489                 | 15 | 16 | 65.73325                 | 19 | 16 | 26.1605                  |   |   |                          |
| 3 | 17 | 30.77876                 | 7 | 17 | 39.34291                 | 11 | 17 | 6.33199                  | 15 | 17 | 10.0018                  | 19 | 17 | 80.80391                 |   |   |                          |
| 3 | 18 | 273.12562                | 7 | 18 | 107.46141                | 11 | 18 | 88.66528                 | 15 | 18 | 64.60244                 | 19 | 18 | 2.3951                   |   |   |                          |
| 3 | 19 | 180.60865                | 7 | 19 | 8.11338                  | 11 | 19 | 5.61699                  | 15 | 19 | 4.20625                  | 19 | 19 | 10.8517                  |   |   |                          |
| 3 | 20 | 172.05948                | 7 | 20 | 120.92238                | 11 | 20 | 116.76808                | 15 | 20 | 160.49878                | 19 | 20 | 10.60217                 |   |   |                          |
| 4 | 0  | 21.96191                 | 8 | 0  | 68.1547                  | 12 | 0  | 1244.96378               | 16 | 0  | 274.51593                | 20 | 0  | 13.01172                 |   |   |                          |



|   |    |          |   |    |           |    |    |           |    |    |            |    |    |          |
|---|----|----------|---|----|-----------|----|----|-----------|----|----|------------|----|----|----------|
| 4 | 1  | 15.0447  | 8 | 1  | 21.89023  | 12 | 1  | 162.05842 | 16 | 1  | 1133.57488 | 20 | 1  | 49.6832  |
| 4 | 2  | 15.07499 | 8 | 2  | 51.32505  | 12 | 2  | 422.43808 | 16 | 2  | 21.38328   | 20 | 2  | 12.45687 |
| 4 | 3  | 91.60129 | 8 | 3  | 112.44791 | 12 | 3  | 33.07049  | 16 | 3  | 144.0737   | 20 | 3  | 84.34729 |
| 4 | 4  | 26.26889 | 8 | 4  | 220.74793 | 12 | 4  | 115.77395 | 16 | 4  | 12.95481   | 20 | 4  | 71.19747 |
| 4 | 5  | 27.35872 | 8 | 5  | 13.58239  | 12 | 5  | 1.0741    | 16 | 5  | 117.3274   | 20 | 5  | 3.91102  |
| 4 | 6  | 10.85921 | 8 | 6  | 257.7854  | 12 | 6  | 115.66964 | 16 | 6  | 16.50722   | 20 | 6  | 85.74628 |
| 4 | 7  | 1.79279  | 8 | 7  | 9.5143    | 12 | 7  | 57.05422  | 16 | 7  | 25.64437   | 20 | 7  | 36.88208 |
| 4 | 8  | 0.86597  | 8 | 8  | 6.06623   | 12 | 8  | 10.88109  | 16 | 8  | 72.97134   | 20 | 8  | 13.22583 |
| 4 | 9  | 44.2144  | 8 | 9  | 109.00067 | 12 | 9  | 14.60036  | 16 | 9  | 67.20633   | 20 | 9  | 90.92689 |
| 4 | 10 | 1.47041  | 8 | 10 | 18.61066  | 12 | 10 | 70.86397  | 16 | 10 | 15.70271   | 20 | 10 | 23.53338 |
| 4 | 11 | 19.91127 | 8 | 11 | 114.49093 | 12 | 11 | 223.48397 | 16 | 11 | 15.24855   | 20 | 11 | 47.09154 |
| 4 | 12 | 8.67657  | 8 | 12 | 21.98593  | 12 | 12 | 35.26729  | 16 | 12 | 104.67036  | 20 | 12 | 11.17464 |
| 4 | 13 | 2.77188  | 8 | 13 | 13.34829  | 12 | 13 | 32.87002  | 16 | 13 | 21.14478   | 20 | 13 | 13.83872 |
| 4 | 14 | 2.88739  | 8 | 14 | 12.087    | 12 | 14 | 7.26702   | 16 | 14 | 135.1859   | 20 | 14 | 2.01303  |
| 4 | 15 | 1.55425  | 8 | 15 | 7.52513   | 12 | 15 | 3.73296   | 16 | 15 | 84.39028   | 20 | 15 | 2.6353   |
| 4 | 16 | 21.78224 | 8 | 16 | 83.18027  | 12 | 16 | 5.59387   | 16 | 16 | 912.59757  | 20 | 16 | 12.57625 |
| 4 | 17 | 4.24727  | 8 | 17 | 197.79934 | 12 | 17 | 6.6235    | 16 | 17 | 10.78593   | 20 | 17 | 90.31819 |
| 4 | 18 | 0.80703  | 8 | 18 | 9.1597    | 12 | 18 | 179.05802 | 16 | 18 | 59.07472   | 20 | 18 | 2.39167  |
| 4 | 19 | 7.49961  | 8 | 19 | 39.99299  | 12 | 19 | 40.46077  | 16 | 19 | 0.40853    | 20 | 19 | 12.72116 |
| 4 | 20 | 29.6821  | 8 | 20 | 6.2454    | 12 | 20 | 94.76074  | 16 | 20 | 481.94567  | 20 | 20 | 11.1208  |

## References

1. D. Kratzert, J. J. Holstein and I. Krossing, *J. Appl. Crystallogr.*, 2015, **48**, 933-938.
2. G. Sheldrick, *Acta Cryst. A*, 2015, **71**, 3-8.
3. O. V. Dolomanov, L. J. Bourhis, R. J. Gildea, J. A. K. Howard and H. Puschmann, *J. Appl. Crystallogr.*, 2009, **42**, 339-341.
4. M. J. Frisch, G. W. Trucks, H. B. Schlegel, G. E. Scuseria, M. A. Robb, J. R. Cheeseman, G. Scalmani, V. Barone, G. A. Petersson, H. Nakatsuji, X. Li, M. Caricato, A. V. Marenich, J. Bloino, B. G. Janesko, R. Gomperts, B. Mennucci, H. P. Hratchian, J. V. Ortiz, A. F. Izmaylov, J. L. Sonnenberg, Williams, F. Ding, F. Lipparini, F. Egidi, J. Goings, B. Peng, A. Petrone, T. Henderson, D. Ranasinghe, V. G. Zakrzewski, J. Gao, N. Rega, G. Zheng, W. Liang, M. Hada, M. Ehara, K. Toyota, R. Fukuda, J. Hasegawa, M. Ishida, T. Nakajima, Y. Honda, O. Kitao, H. Nakai, T. Vreven, K. Throssell, J. A. Montgomery Jr., J. E. Peralta, F. Ogliaro, M. J. Bearpark, J. J. Heyd, E. N. Brothers, K. N. Kudin, V. N. Staroverov, T. A. Keith, R. Kobayashi, J. Normand, K. Raghavachari, A. P. Rendell, J. C. Burant, S. S. Iyengar, J. Tomasi, M. Cossi, J. M. Millam, M. Klene, C. Adamo, R. Cammi, J. W. Ochterski, R. L. Martin, K. Morokuma, O. Farkas, J. B. Foresman and D. J. Fox, 2016.
5. A. V. Marenich, C. J. Cramer and D. G. Truhlar, *J. Phys. Chem. B*, 2009, **113**, 6378-6396.
6. J. P. Perdew, K. Burke and M. Ernzerhof, *Phys. Rev. Lett.*, 1996, **77**, 3865-3868.
7. C. Adamo and V. Barone, *J. Chem. Phys.*, 1999, **110**, 6158-6170.
8. B. Metz, H. Stoll and M. Dolg, *J. Chem. Phys.*, 2000, **113**, 2563-2569.
9. P. C. Hariharan and J. A. Pople, *Theor. Chim. Acta*, 1973, **28**, 213-222.
10. F. Neese, *WIREs Comput. Mol. Sci.*, 2018, **8**, e1327.
11. F. Neese, *J. Chem. Phys.*, 2005, **122**.
12. D. A. Pantazis and F. Neese, *J. Chem. Theory Comput.*, 2009, **5**, 2229-2238.
13. D. A. Pantazis, X.-Y. Chen, C. R. Landis and F. Neese, *J. Chem. Theory Comput.*, 2008, **4**, 908-919.
14. D. A. Pantazis and F. Neese, *Theor. Chem. Acc.*, 2012, **131**, 1292.
15. F. Weigend and R. Ahlrichs, *Phys. Chem. Chem. Phys.*, 2005, **7**, 3297-3305.
16. F. Weigend, *Phys. Chem. Chem. Phys.*, 2006, **8**, 1057-1065.
17. N. M. O'Boyle, A. L. Tenderholt and K. M. Langner, *J. Comput. Chem.*, 2008, **29**, 839-845.
18. M. D. Hanwell, D. E. Curtis, D. C. Lonie, T. Vandermeersch, E. Zurek and G. R. Hutchison, *J. Cheminf.*, 2012, **4**, 17.
19. O. Tange, *The USENIX Magazine*, 2011, **36**, 42-47.
20. W. Humphrey, A. Dalke and K. Schulten, *J. Mol. Graph.*, 1996, **14**, 33-38, 27-38.
21. Povray.org, <http://www.povray.org/download/>, (accessed October 2024).
22. J. Hyvl, W. Y. Yoshida, A. L. Rheingold, R. P. Hughes and M. F. Cain, *Chem. Eur. J.*, 2016, **22**, 17562-17565.
23. P. Šimon, F. de Proft, R. Jambor, A. Růžička and L. Dostál, *Angew. Chem. Int. Ed.*, 2010, **49**, 5468-5471.
